# Supplementary material for: Development and Validation of an Arterial Pressure-Based Cardiac Output Algorithm Using a Convolutional Neural Network: Retrospective Study Based on Prospective Registry Data
Source: PubMed Central journal article supplement (PMC8406105; doi:10.2196/24762), 2021-08-16

CaseID : Patient0 (anonymized)

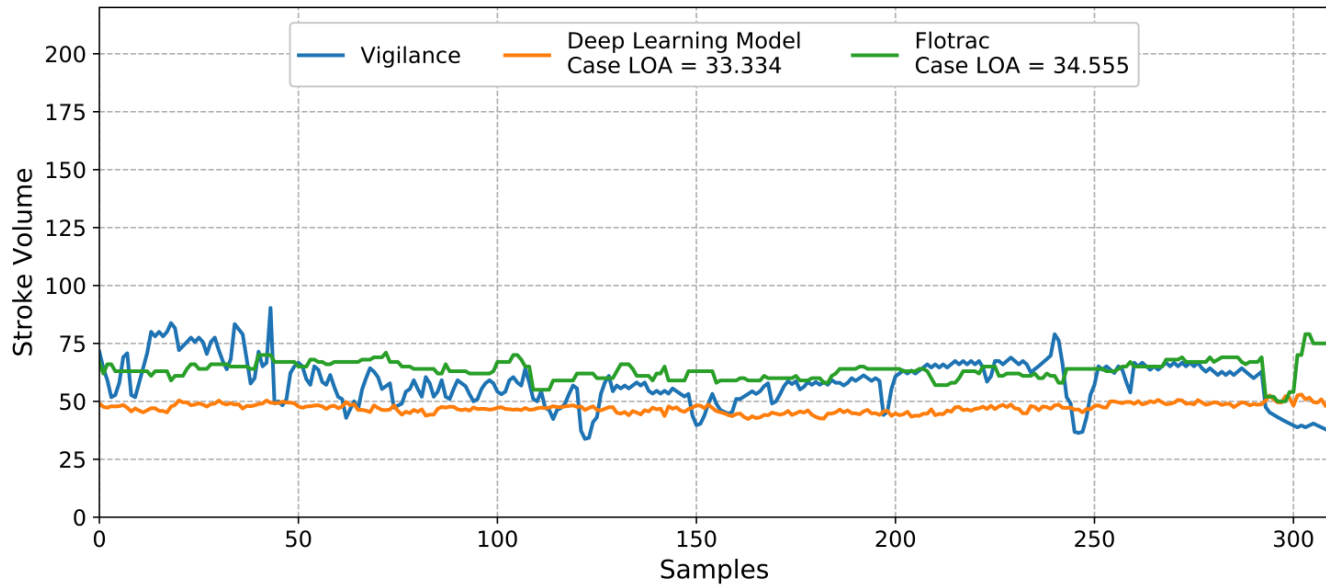

CaseID : Patient1 (anonymized)

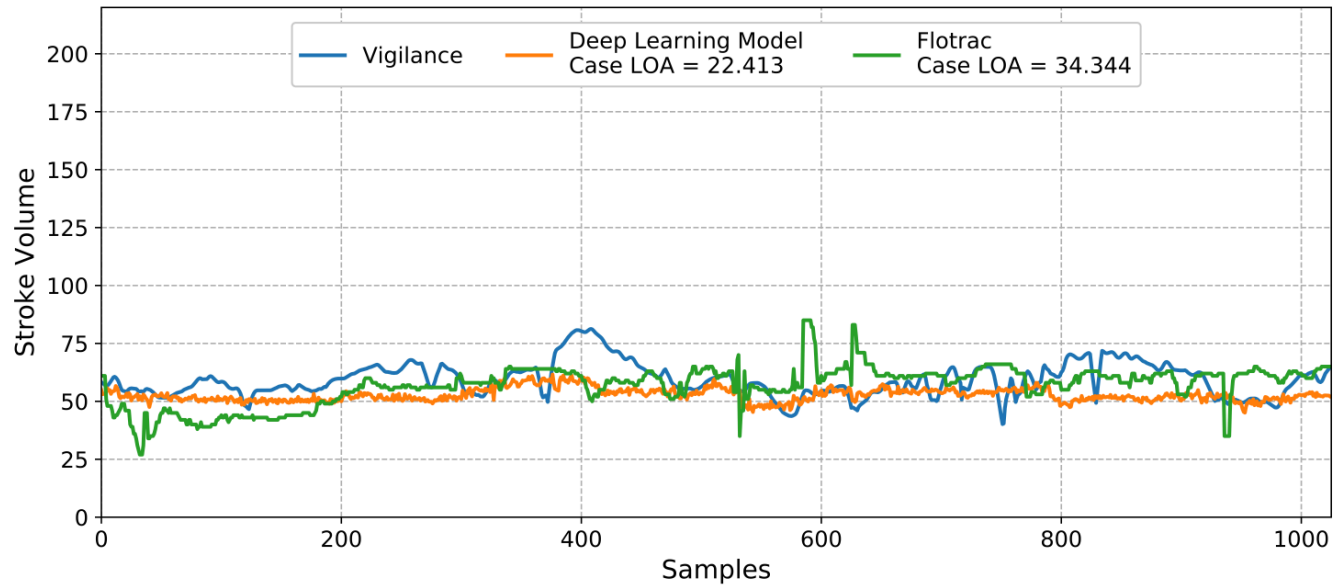

CaseID : Patient2 (anonymized)

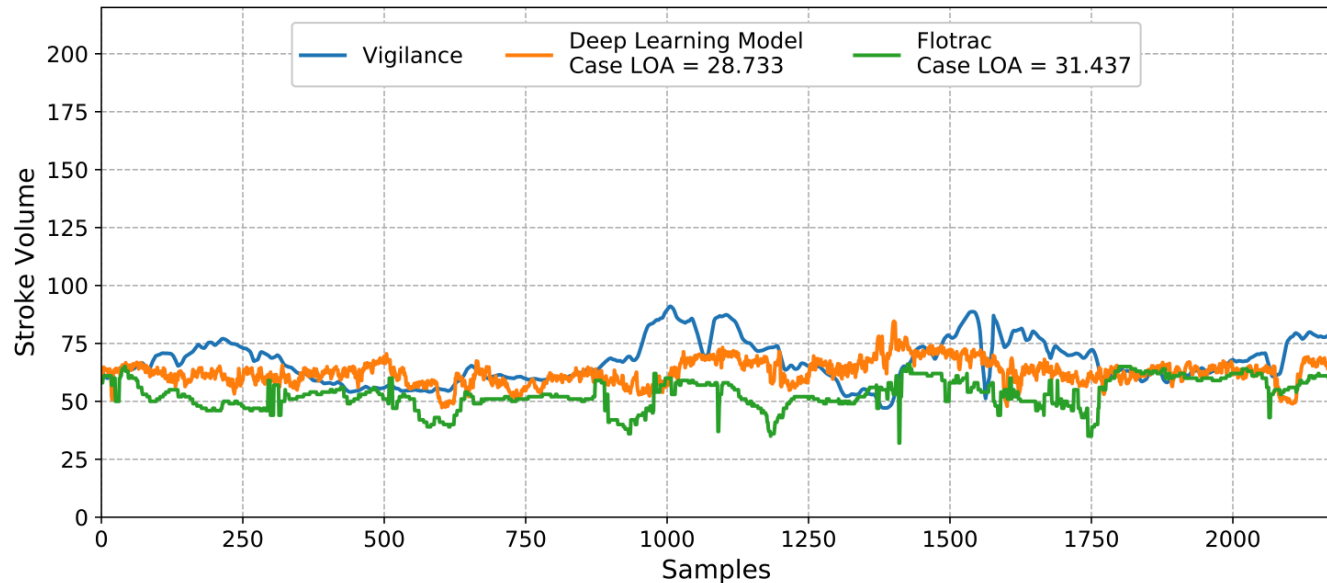

CaseID : Patient3 (anonymized)

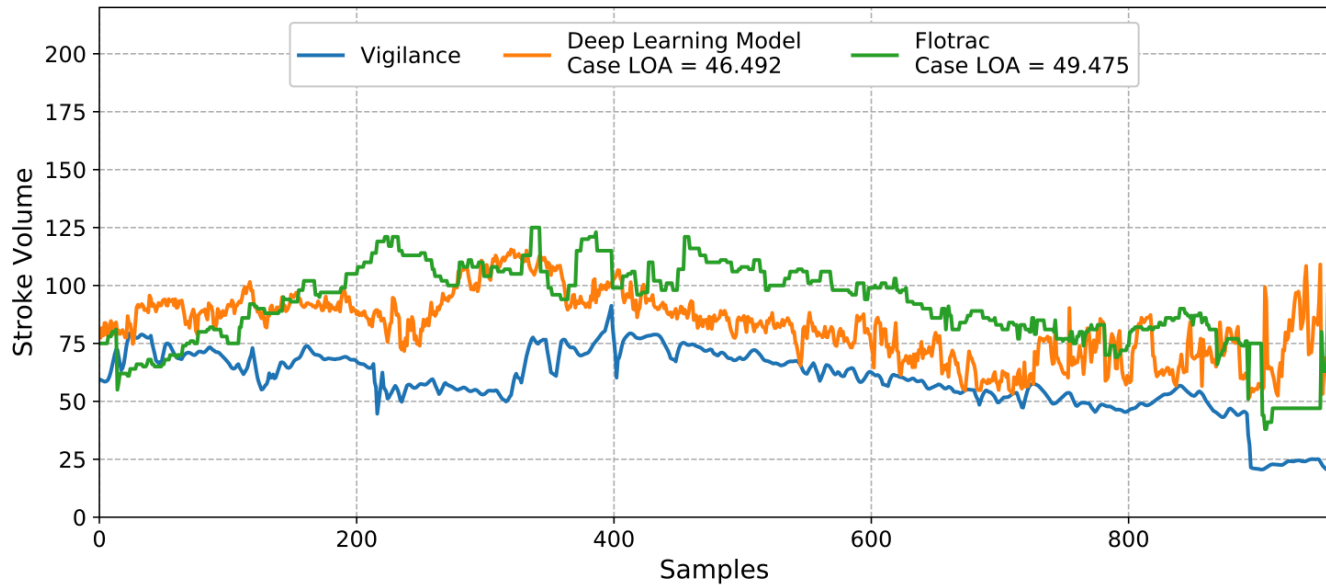



CaseID : Patient4 (anonymized)

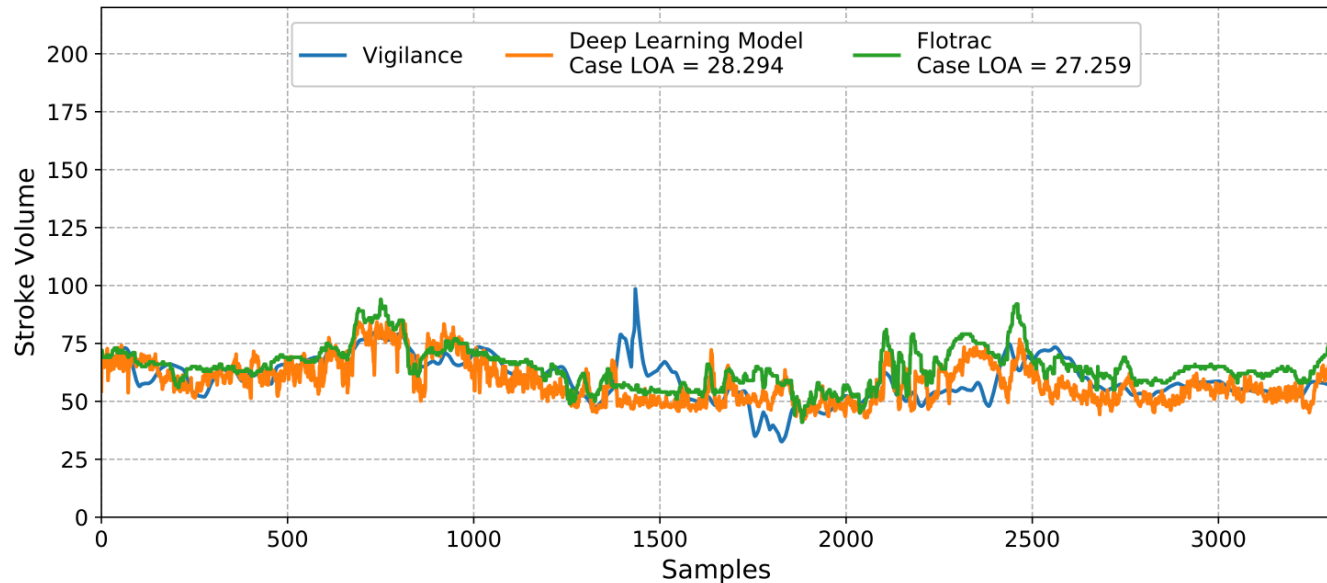

CaseID : Patient5 (anonymized)

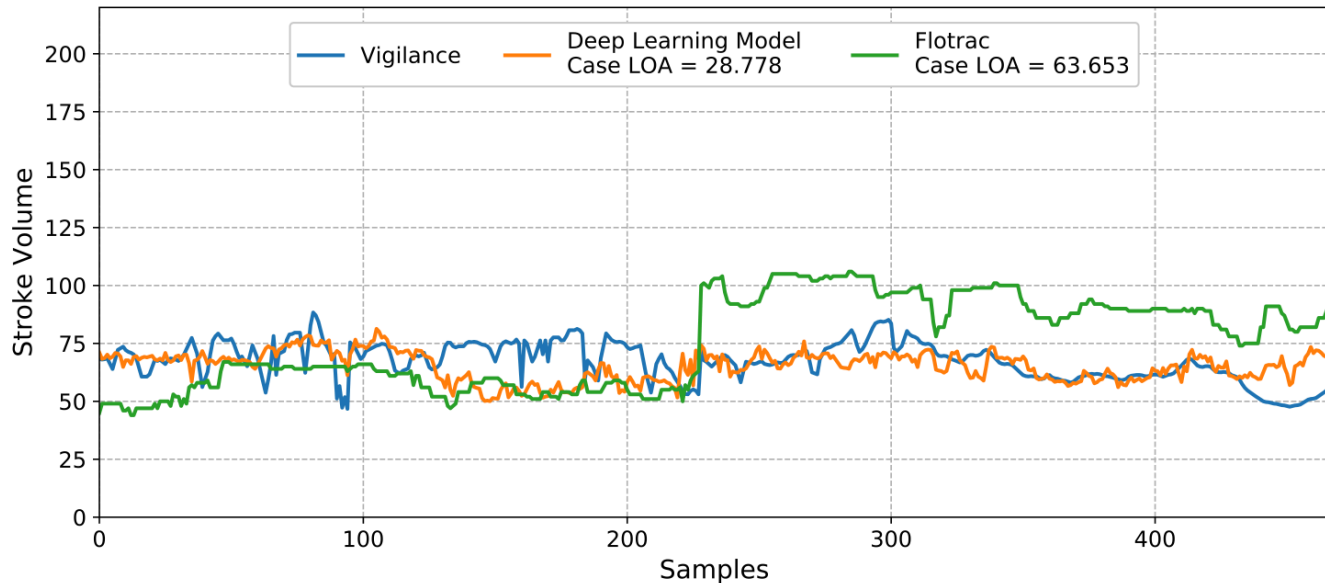

CaseID : Patient6 (anonymized)

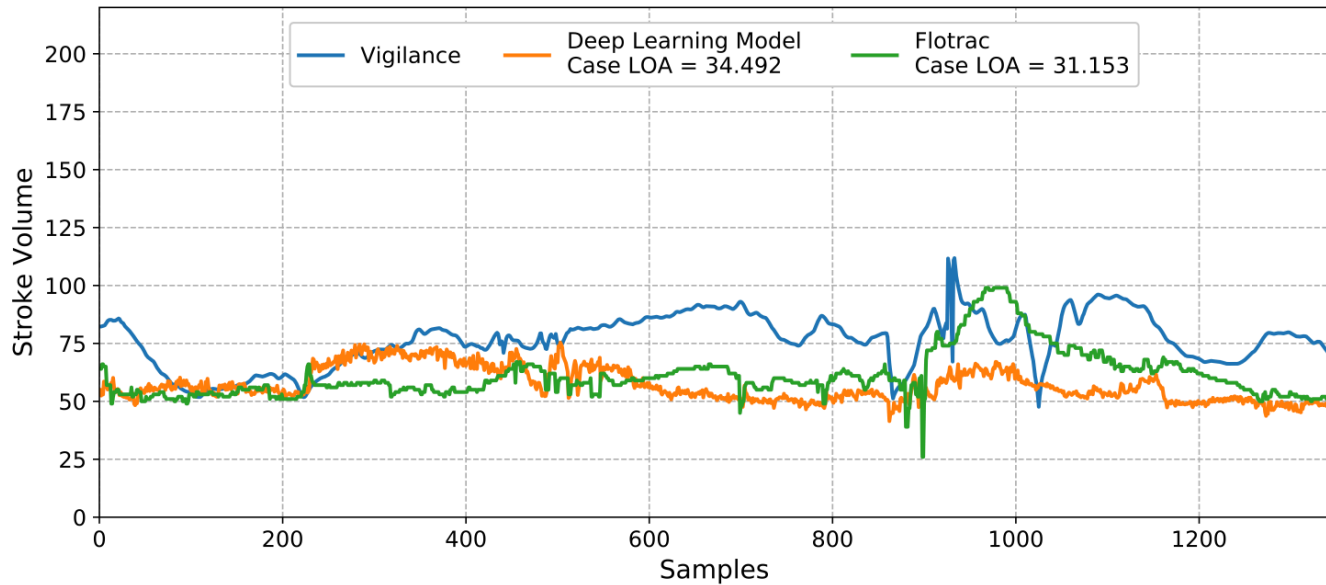

CaseID : Patient7 (anonymized)

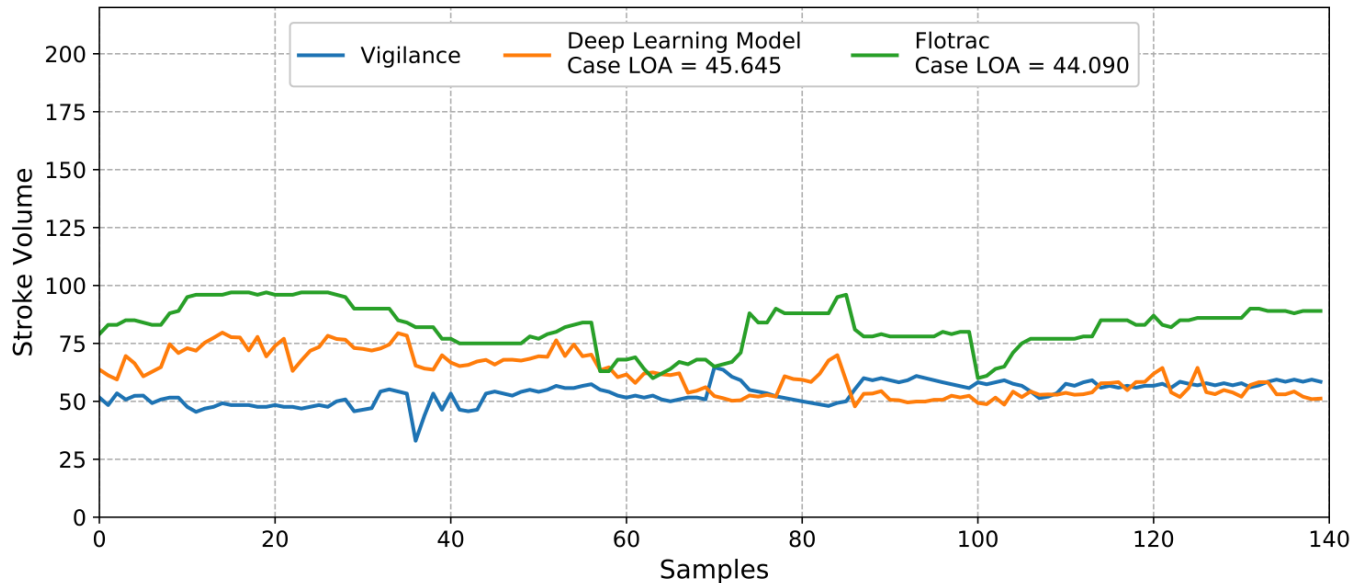

CaseID : Patient8 (anonymized)

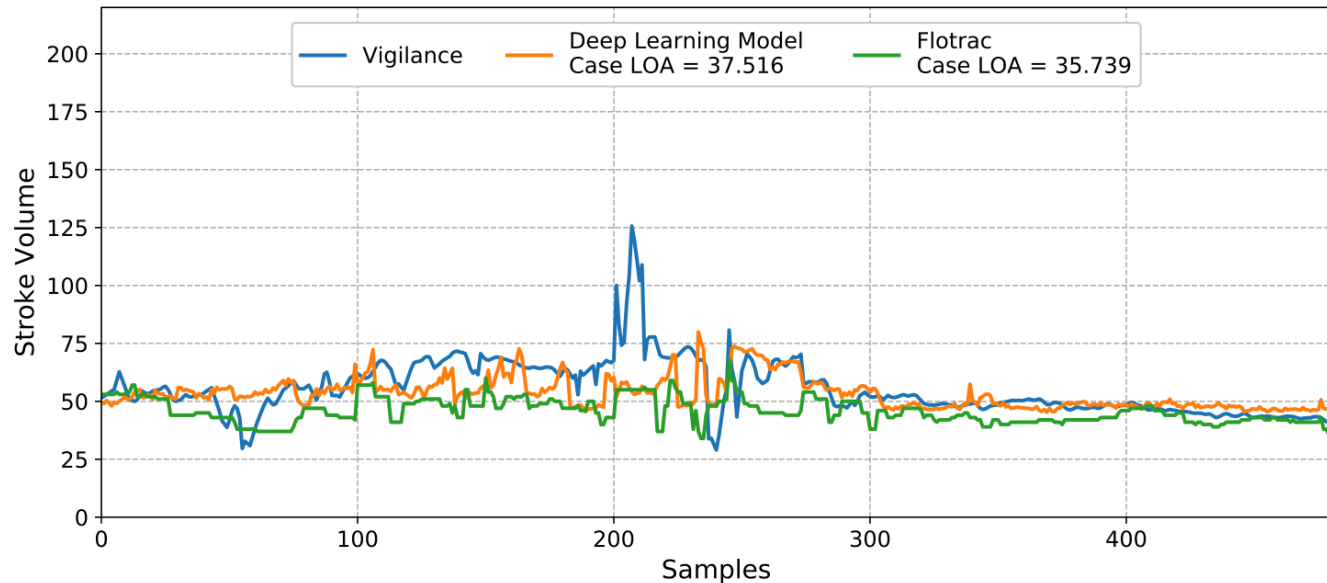

CaseID : Patient9 (anonymized)

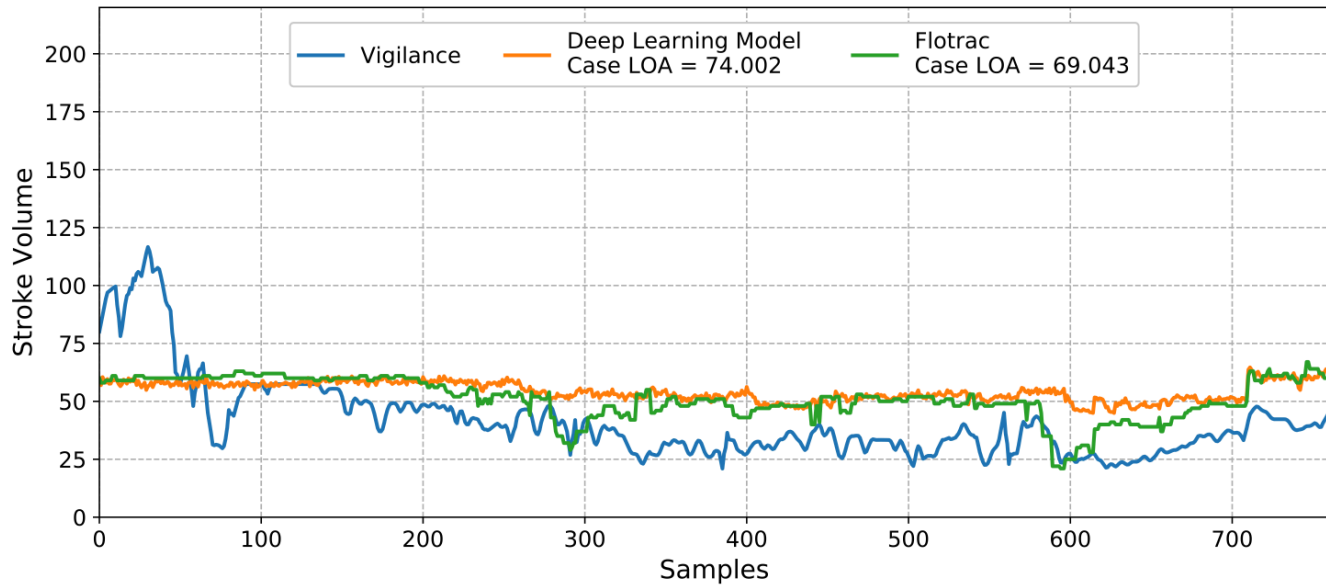

CaseID : Patient10 (anonymized)

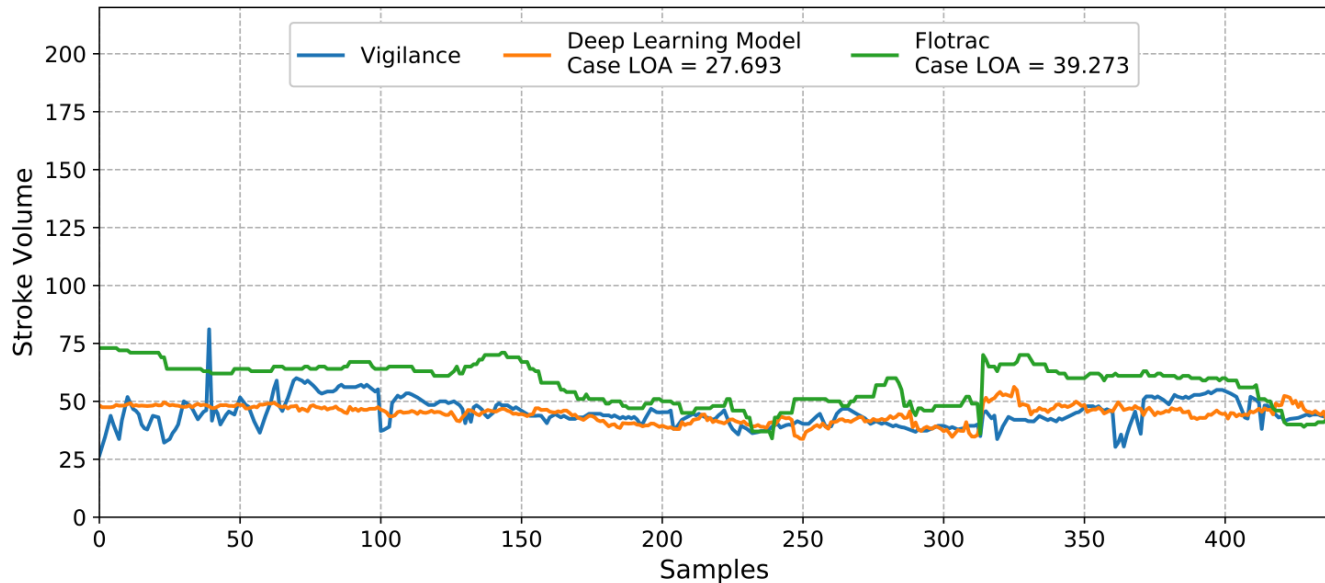

CaseID : Patient11 (anonymized)

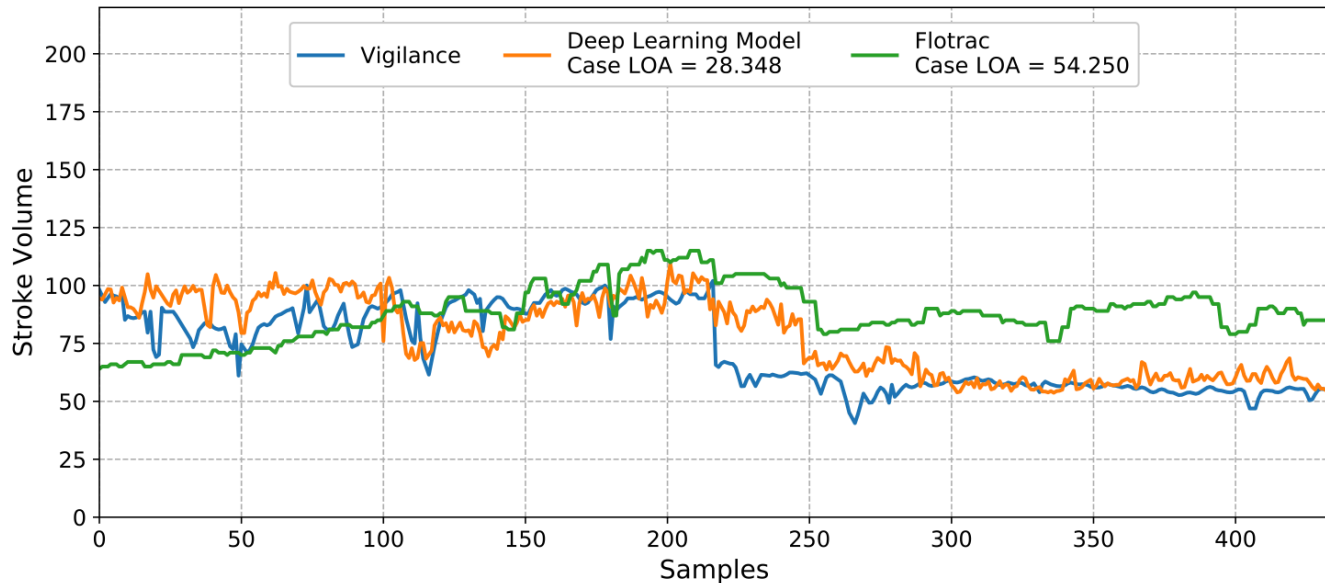



CaseID : Patient12 (anonymized)

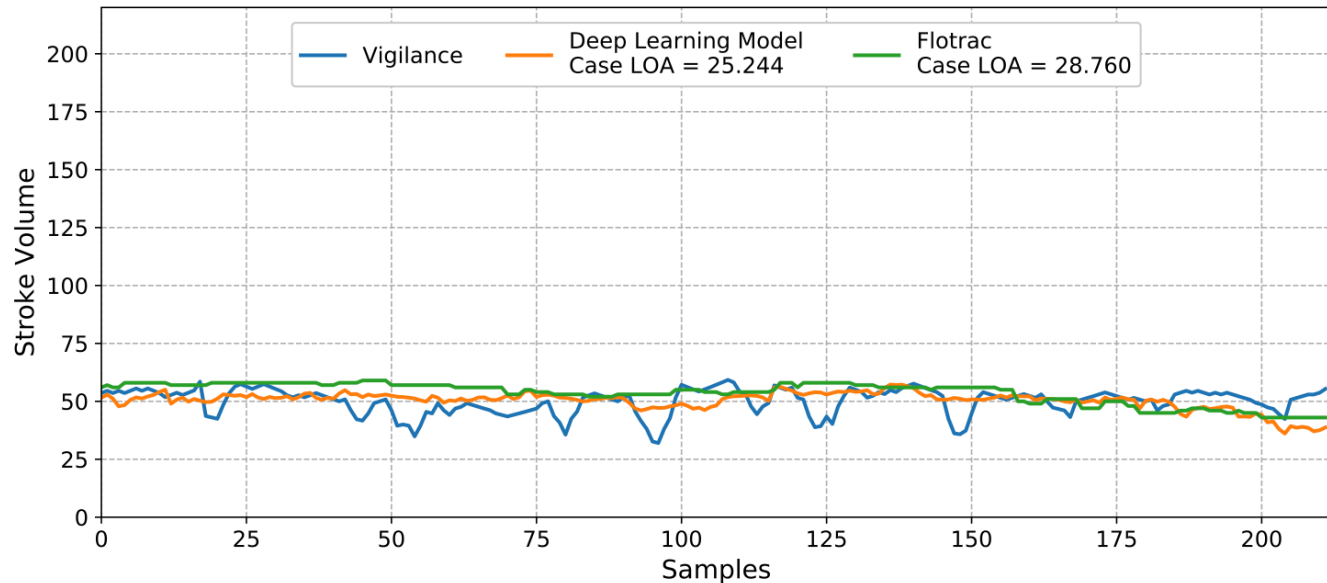

CaseID : Patient13 (anonymized)

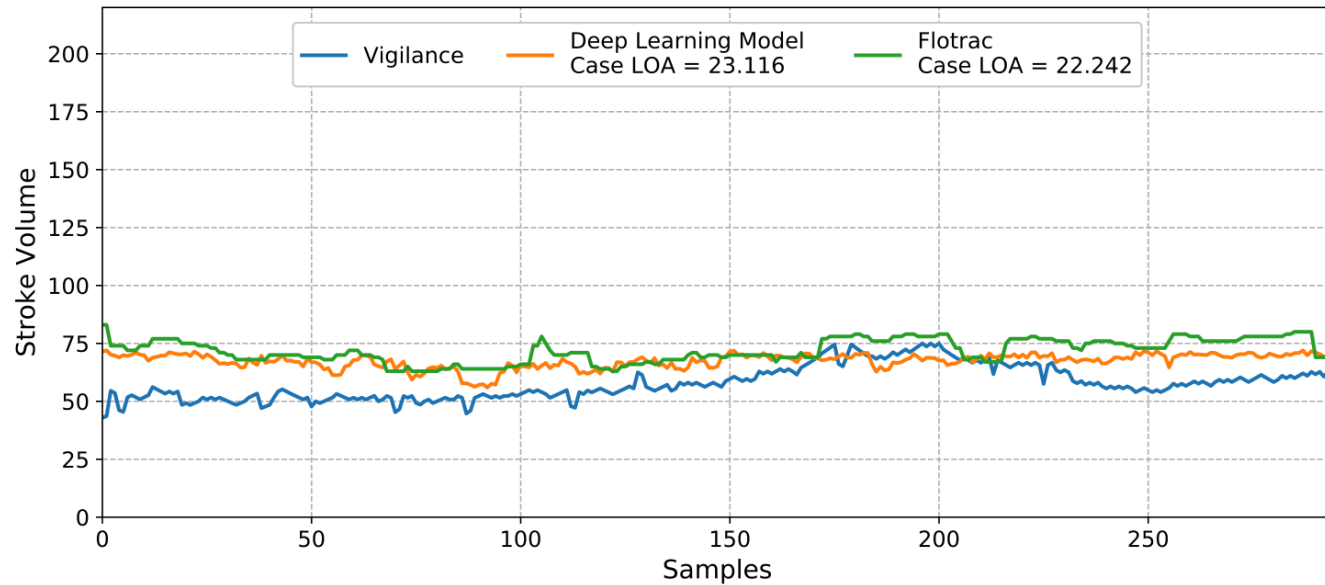

CaseID : Patient14 (anonymized)

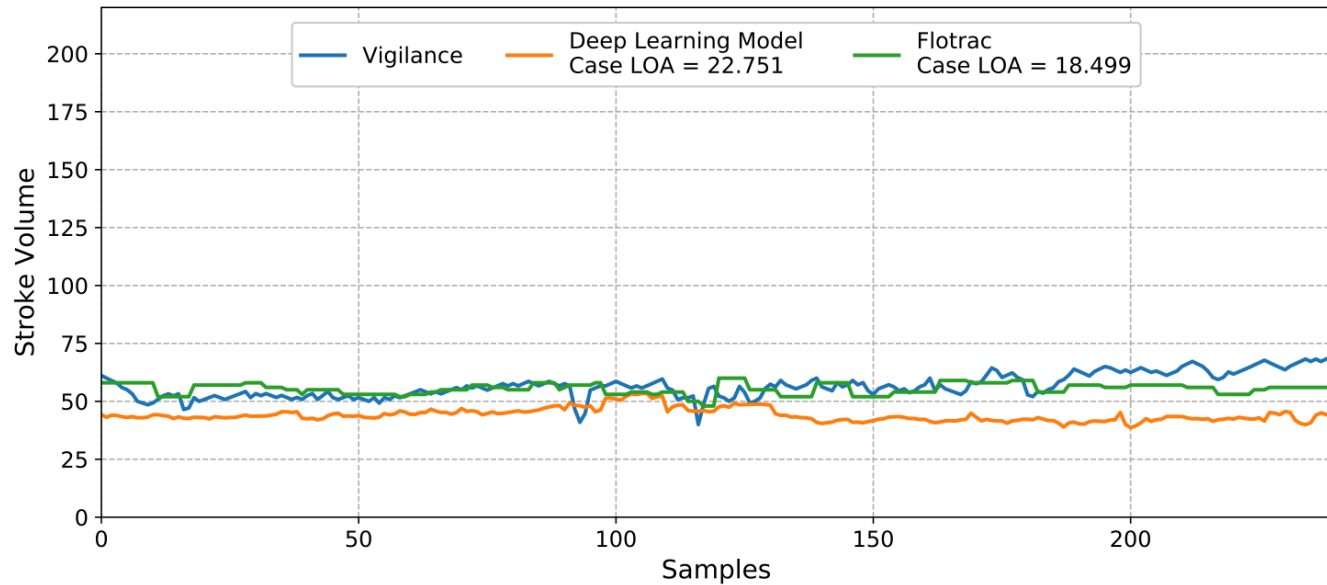

CaseID : Patient15 (anonymized)

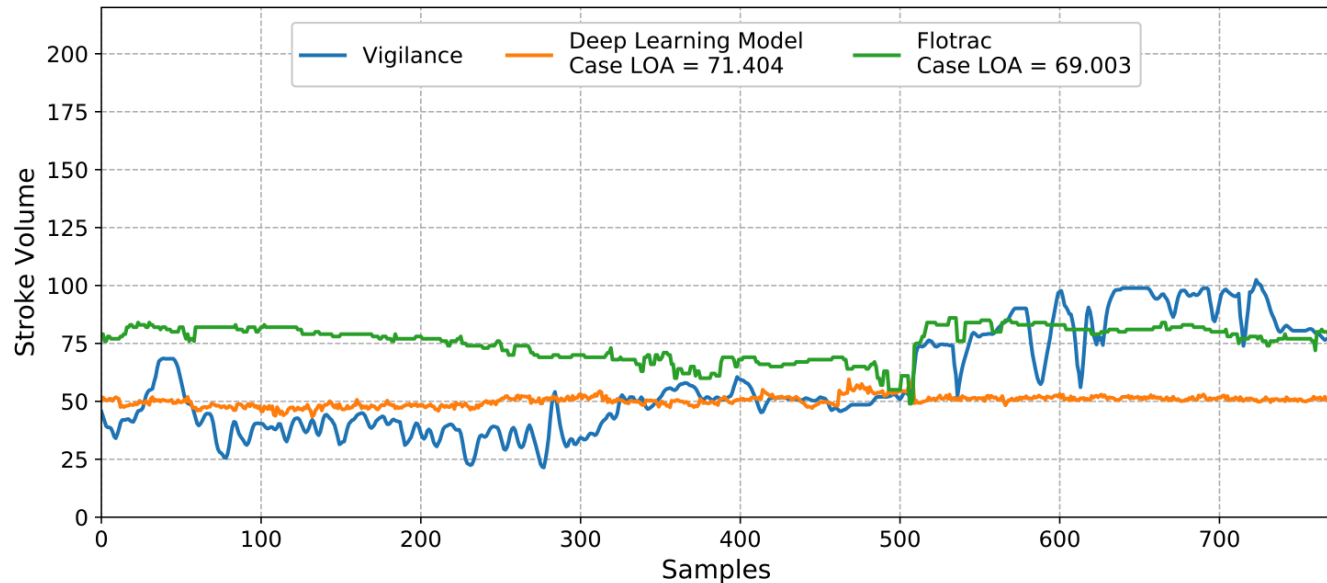

CaseID : Patient16 (anonymized)

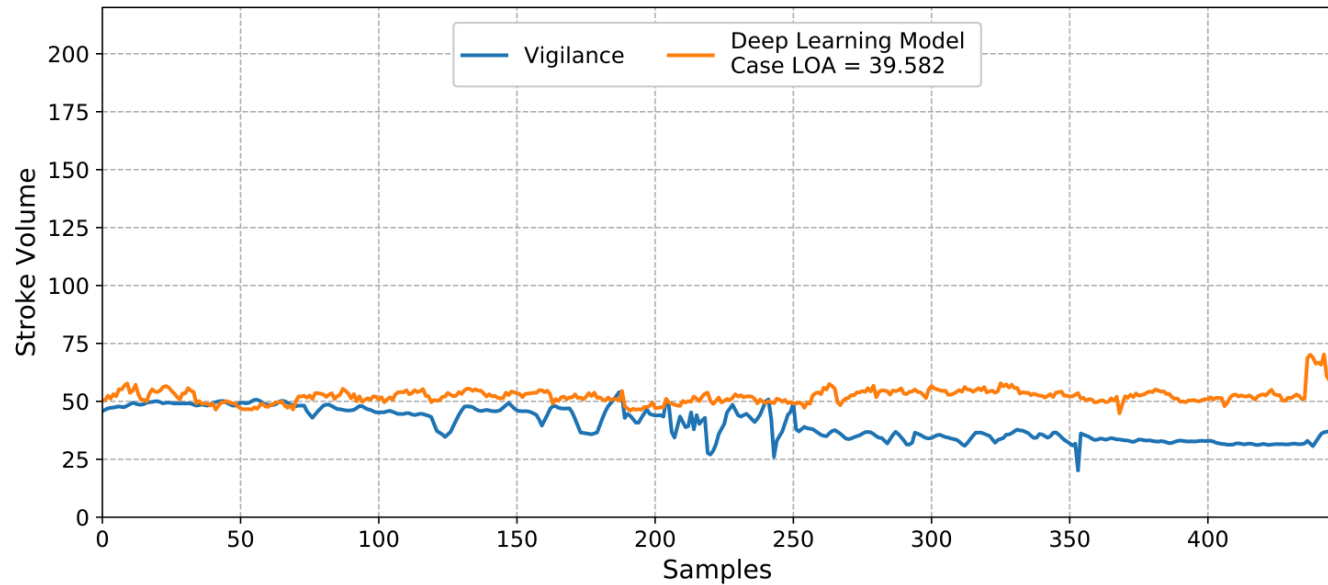

CaseID : Patient17 (anonymized)

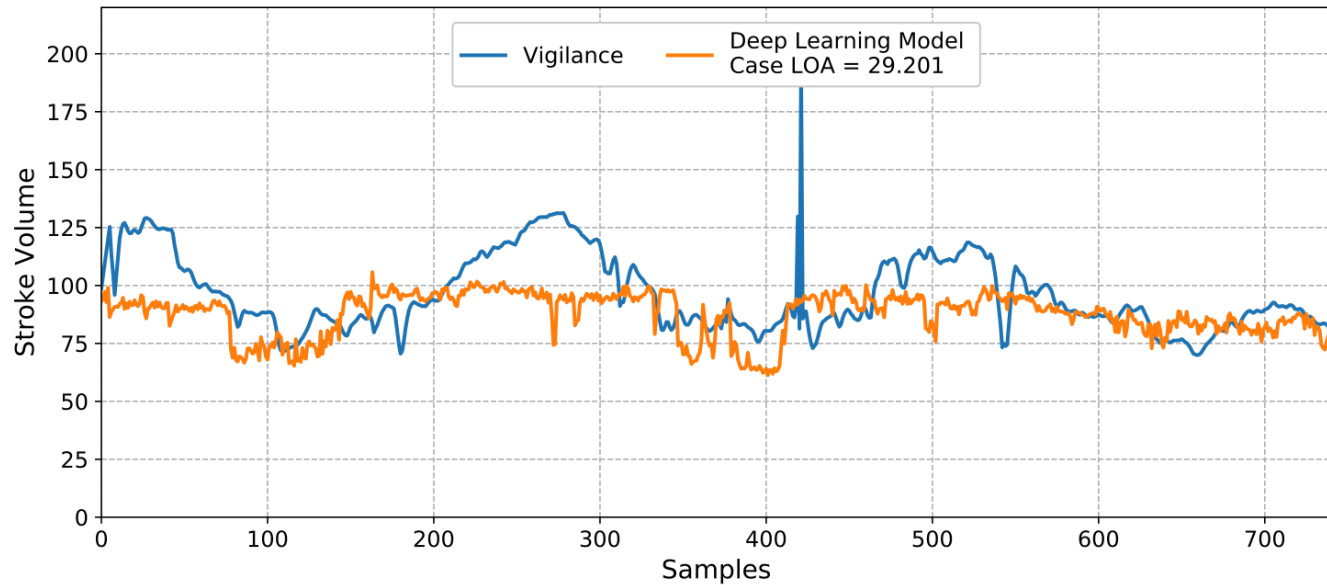

CaseID : Patient18 (anonymized)

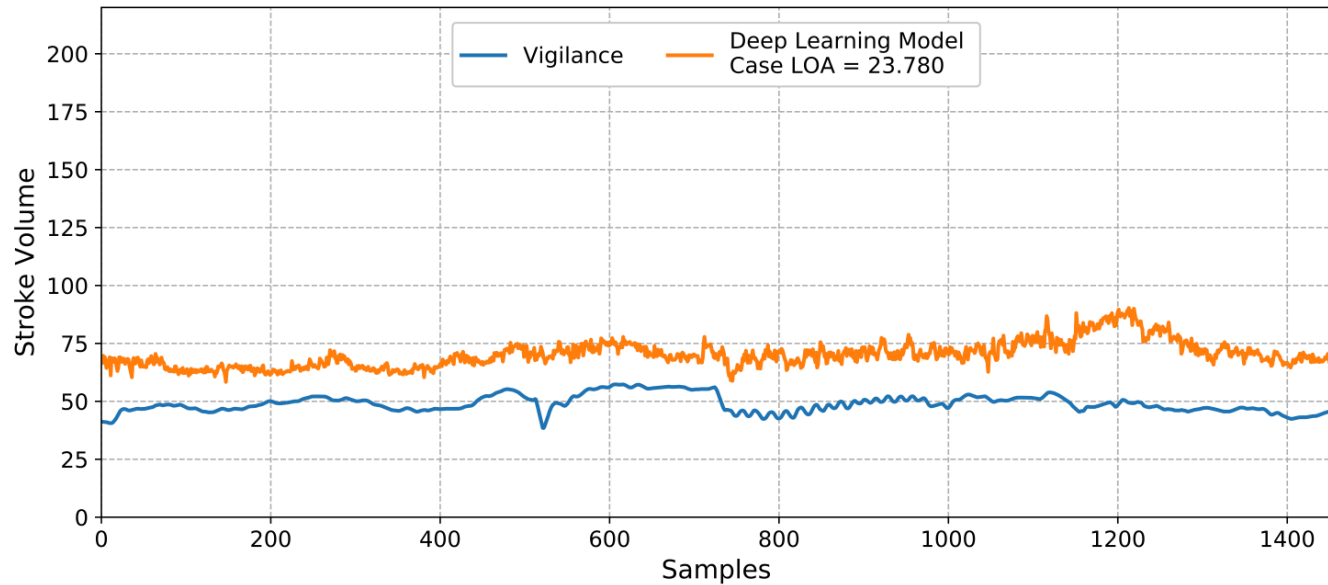

CaseID : Patient19 (anonymized)

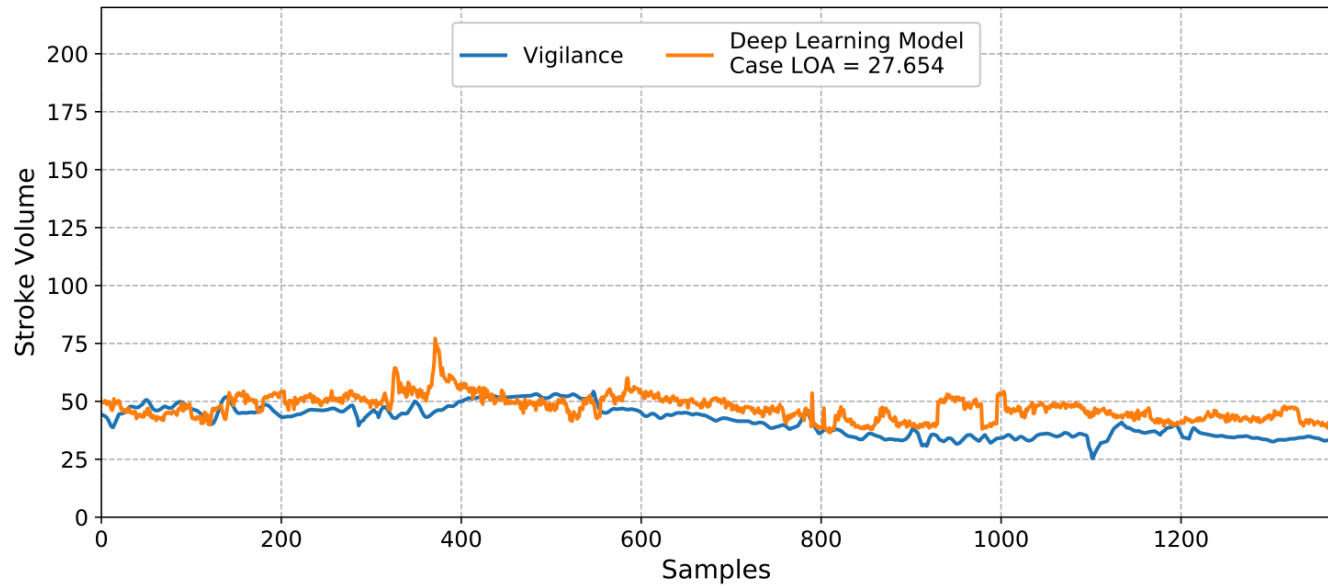



CaseID : Patient20 (anonymized)

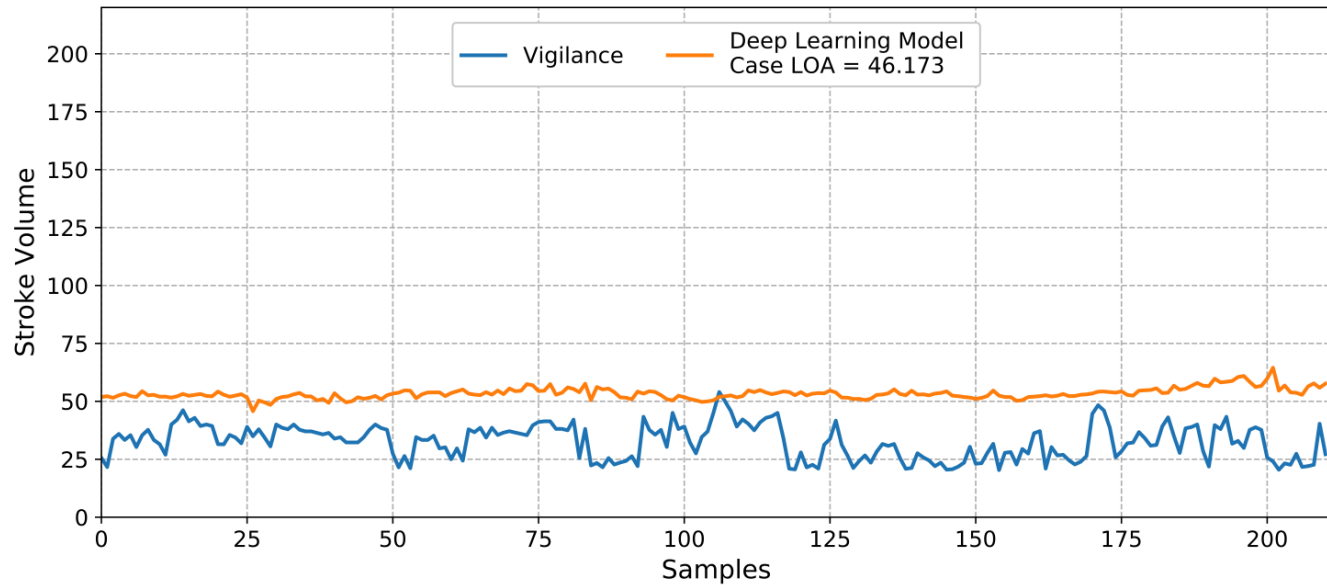

CaseID : Patient21 (anonymized)

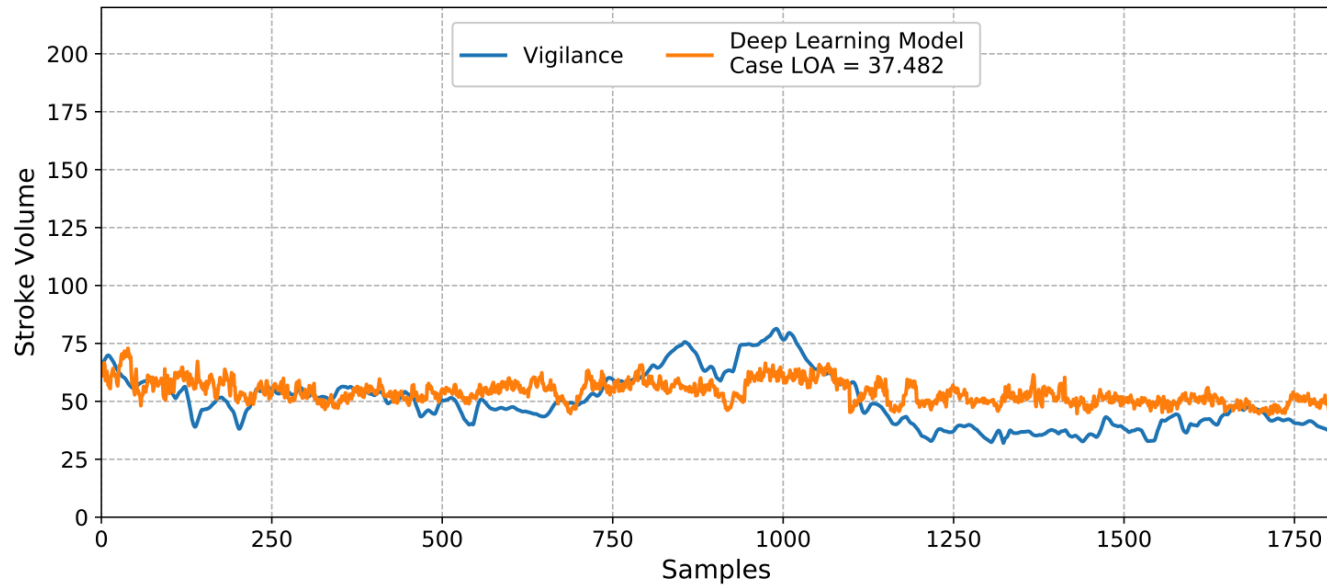

CaseID : Patient22 (anonymized)

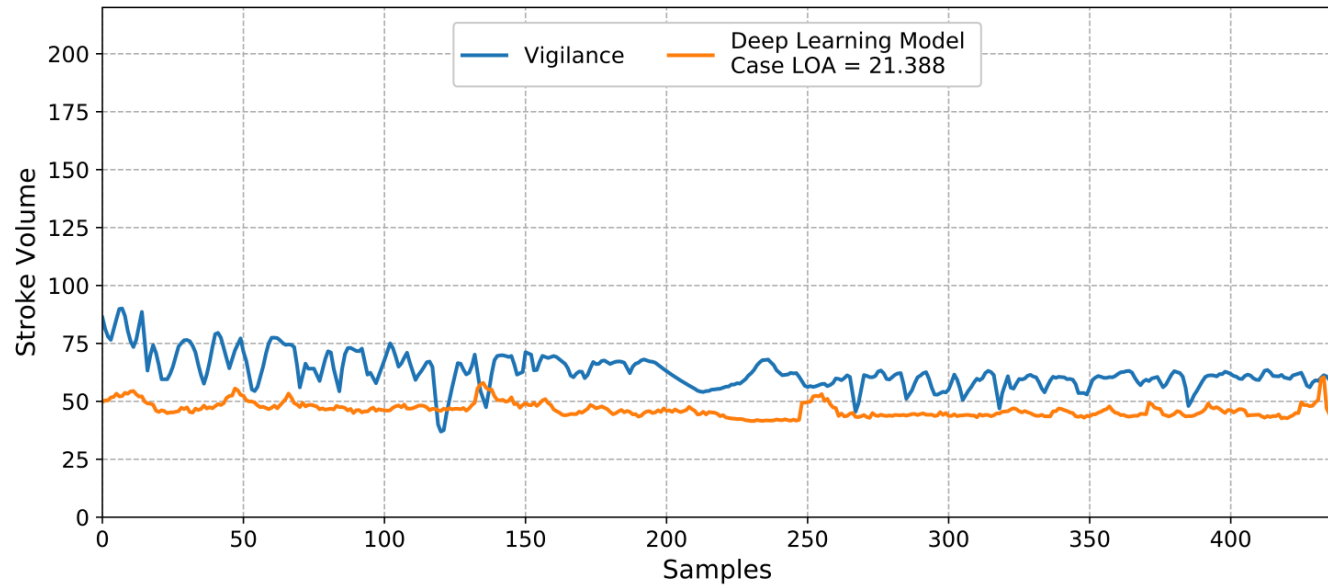

CaseID : Patient23 (anonymized)

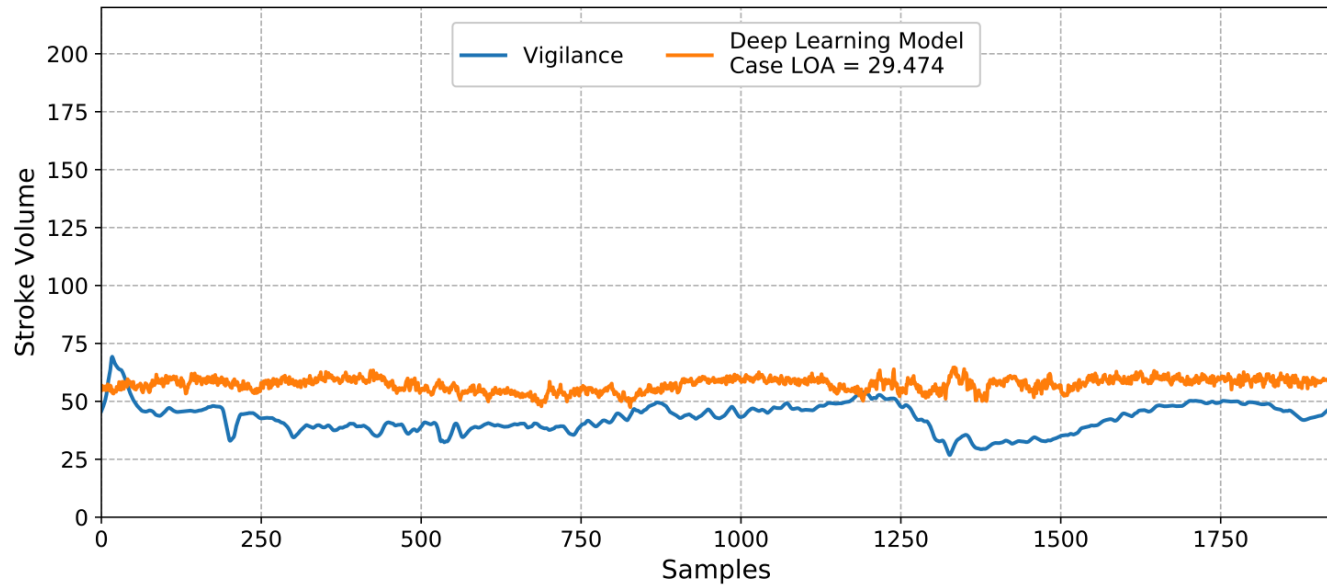

CaseID : Patient24 (anonymized)

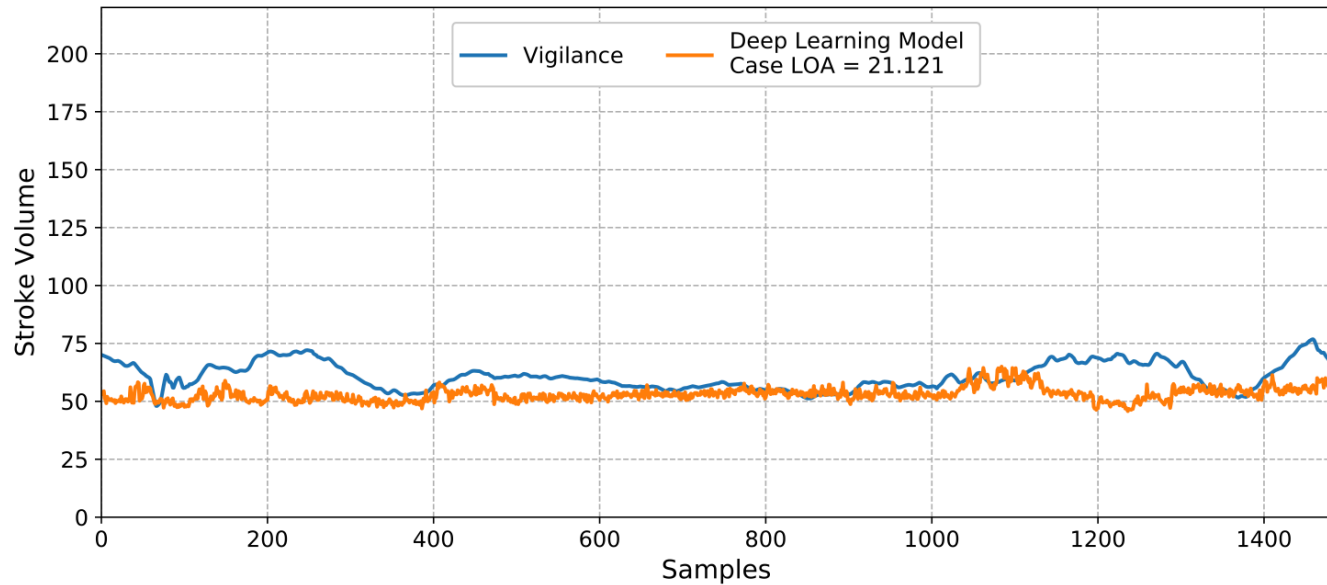

CaseID : Patient25 (anonymized)

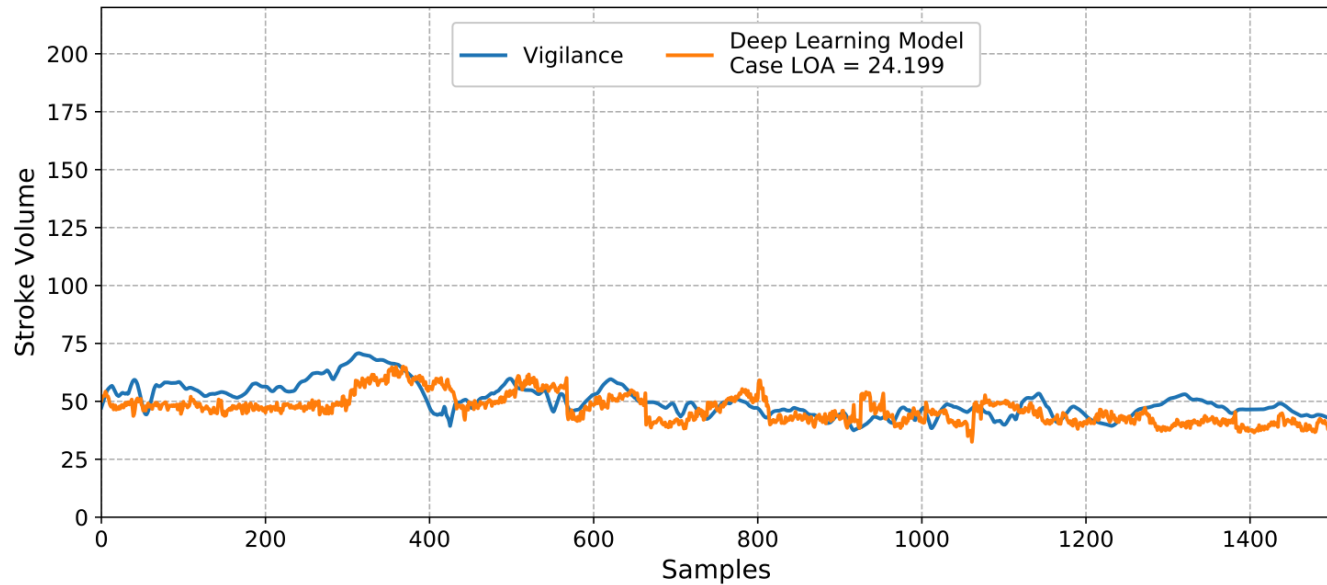

CaseID : Patient26 (anonymized)

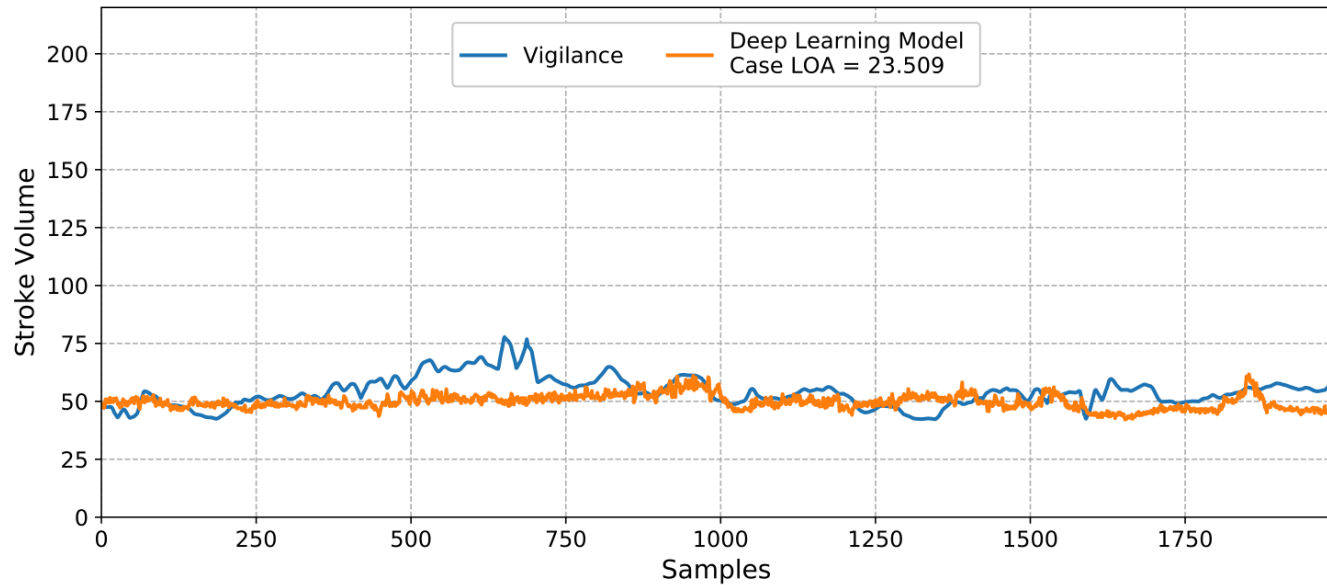

CaseID : Patient27 (anonymized)

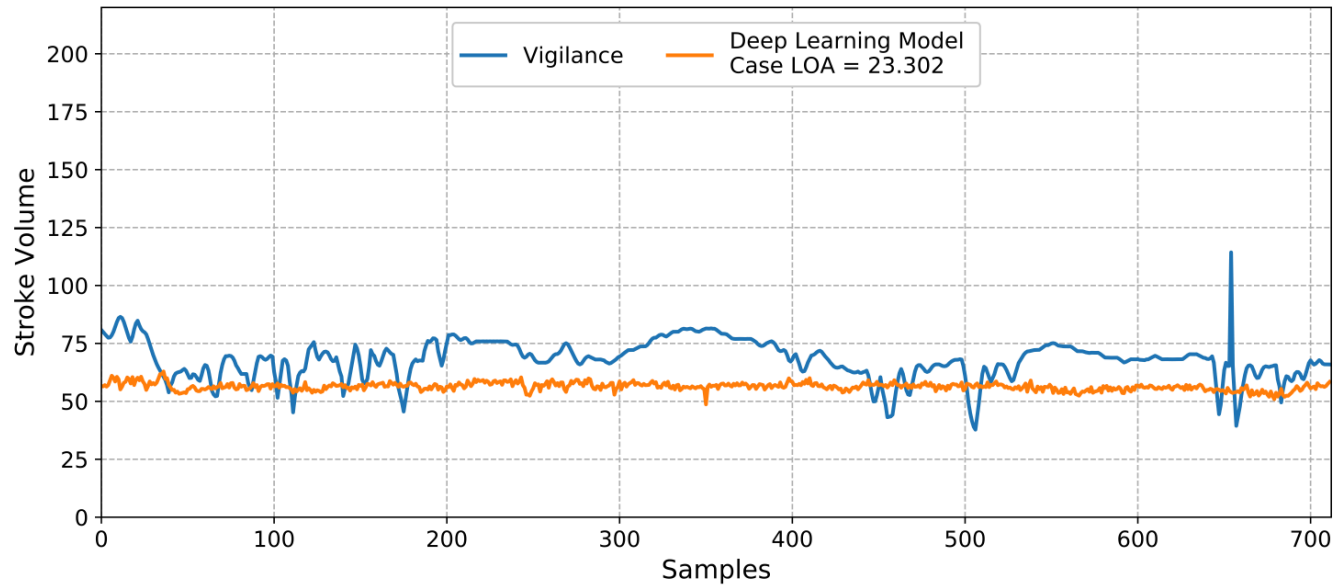



CaseID : Patient28 (anonymized)

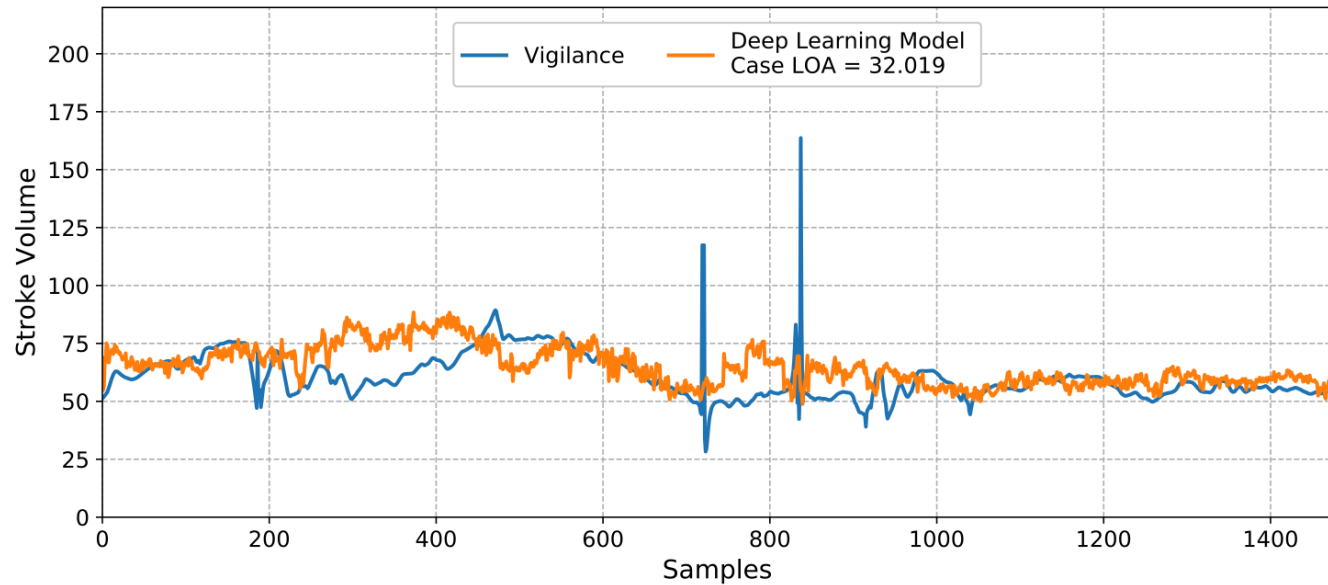

CaseID : Patient29 (anonymized)

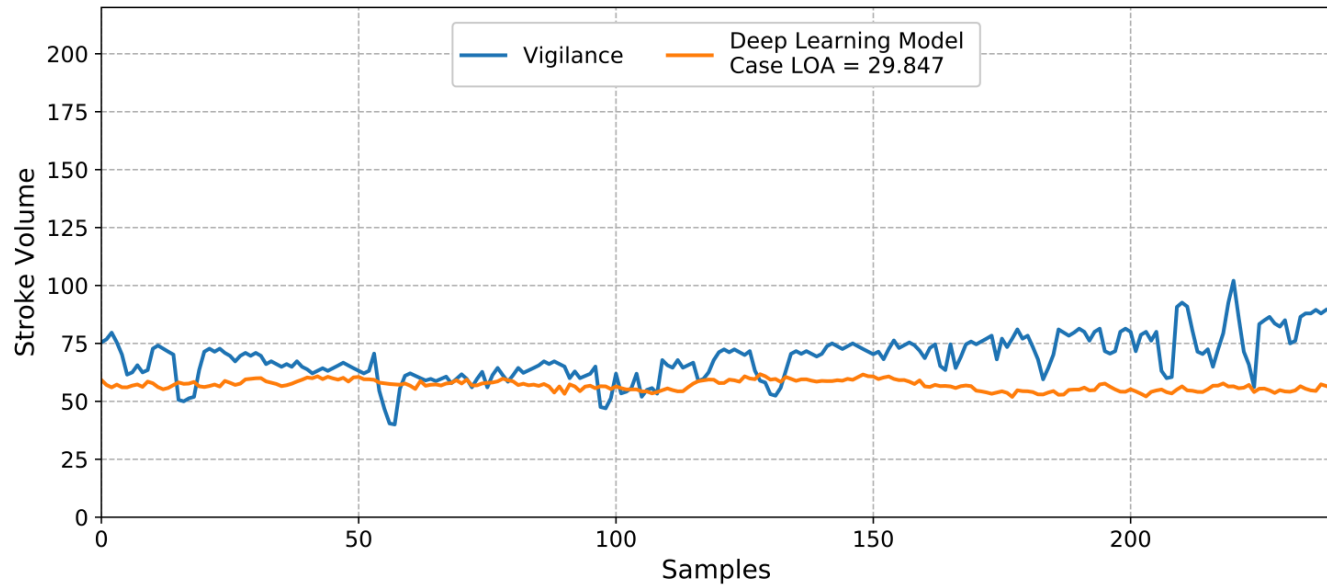

CaseID : Patient30 (anonymized)

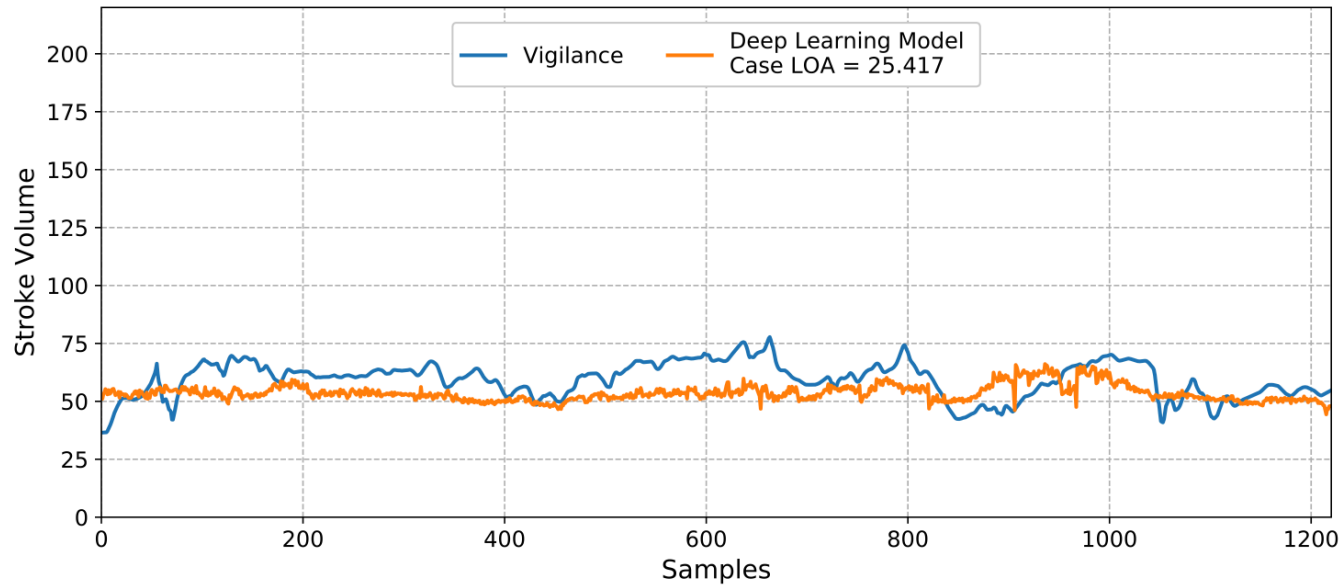

CaseID : Patient31 (anonymized)

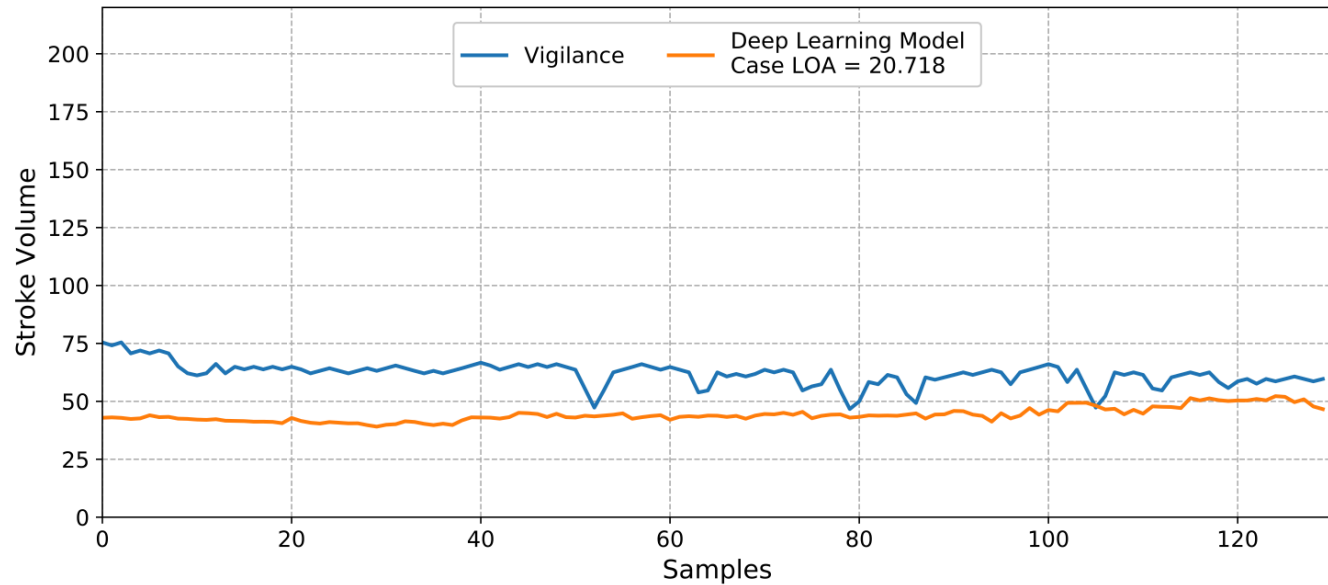

CaseID : Patient32 (anonymized)

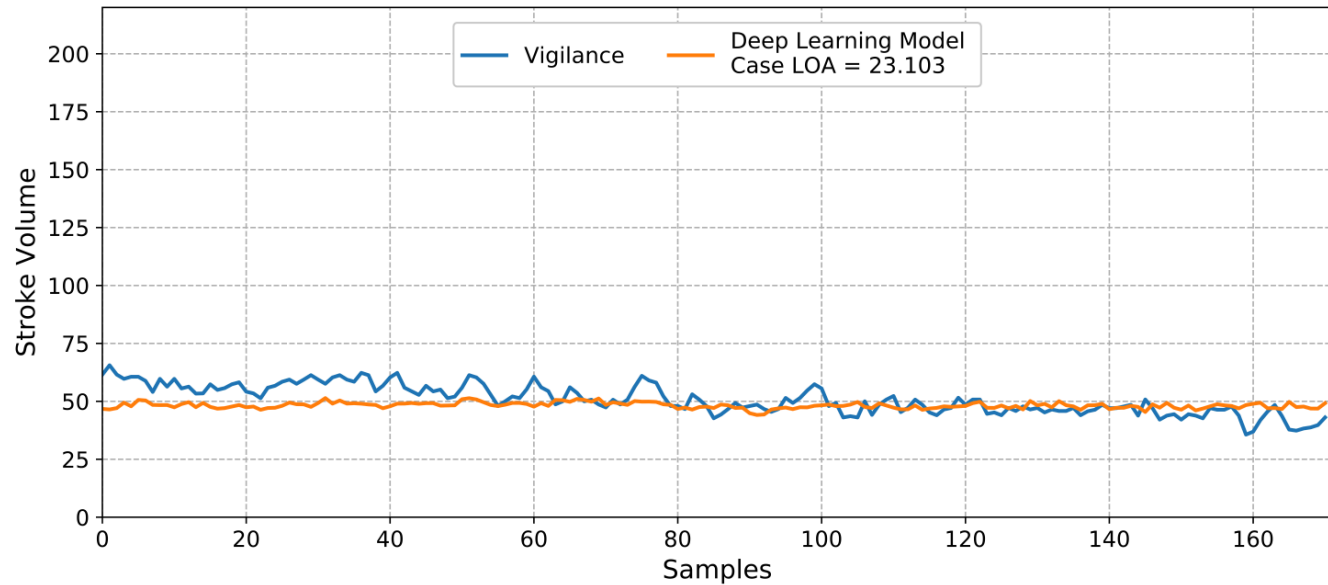

CaseID : Patient33 (anonymized)

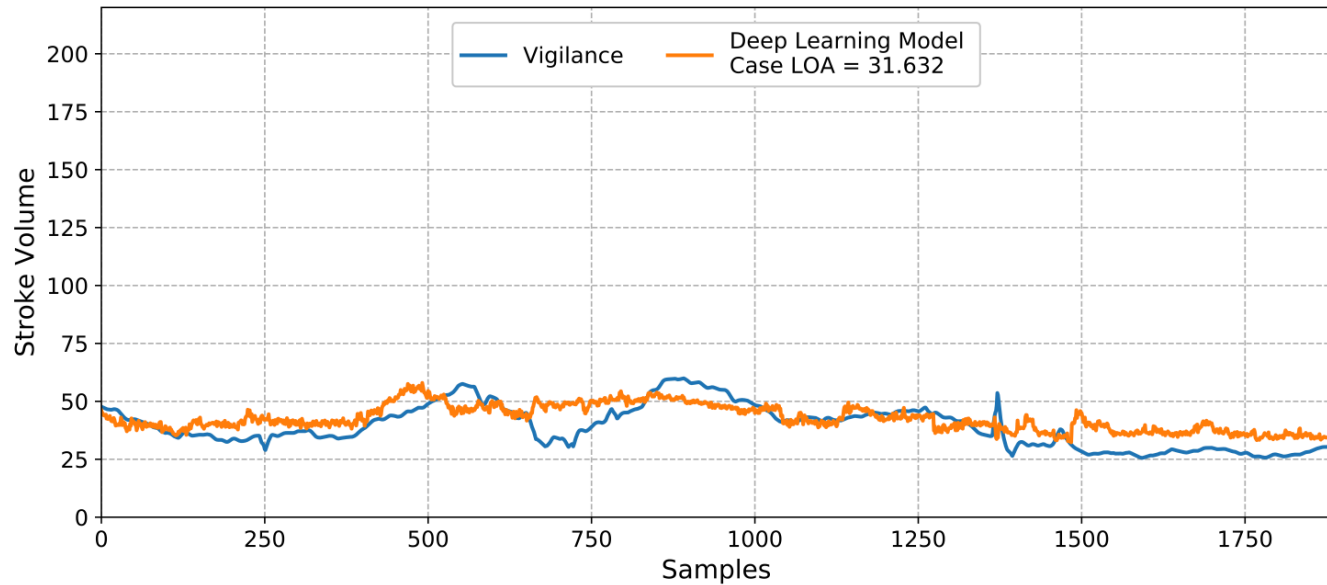

CaseID : Patient34 (anonymized)

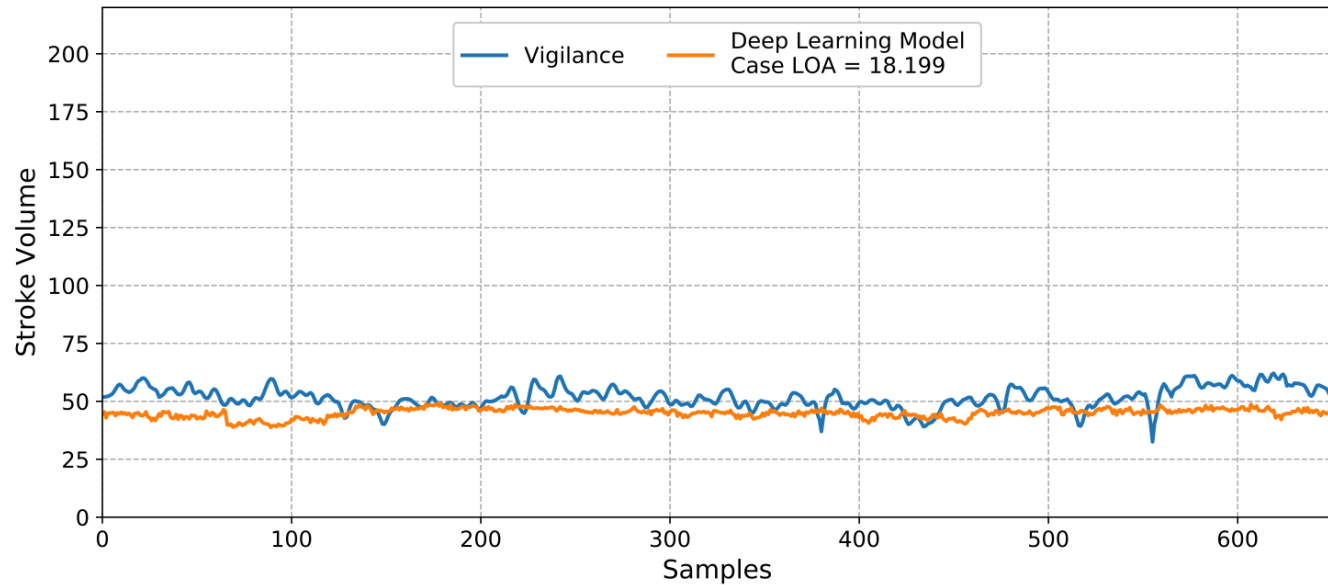

CaseID : Patient35 (anonymized)

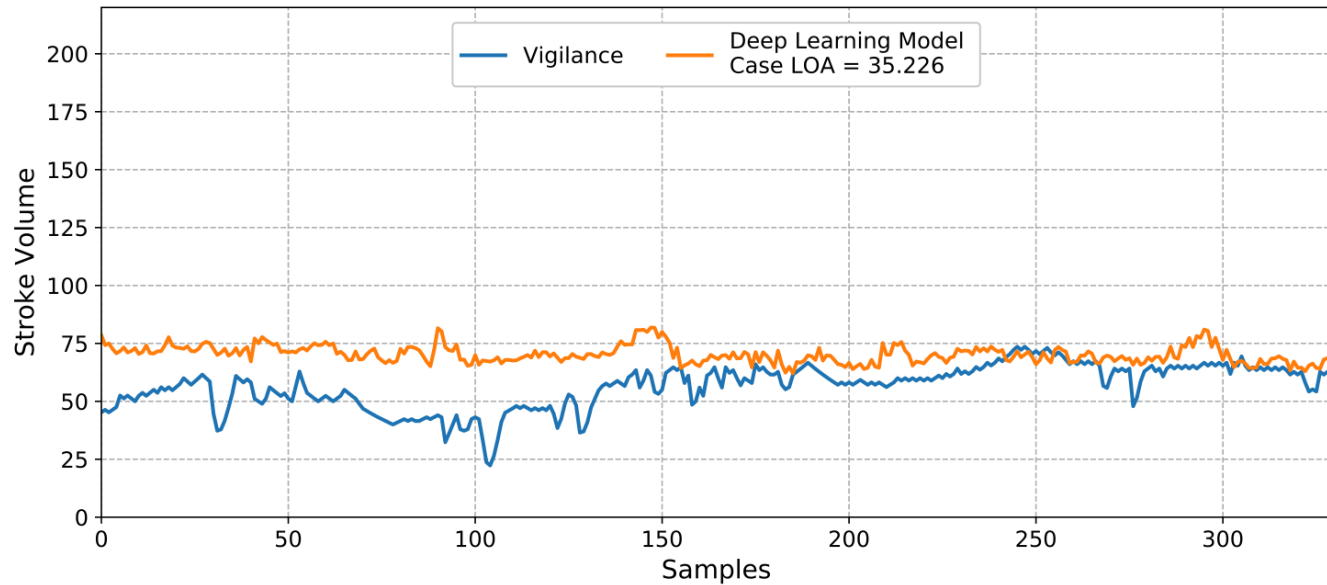



CaseID : Patient36 (anonymized)

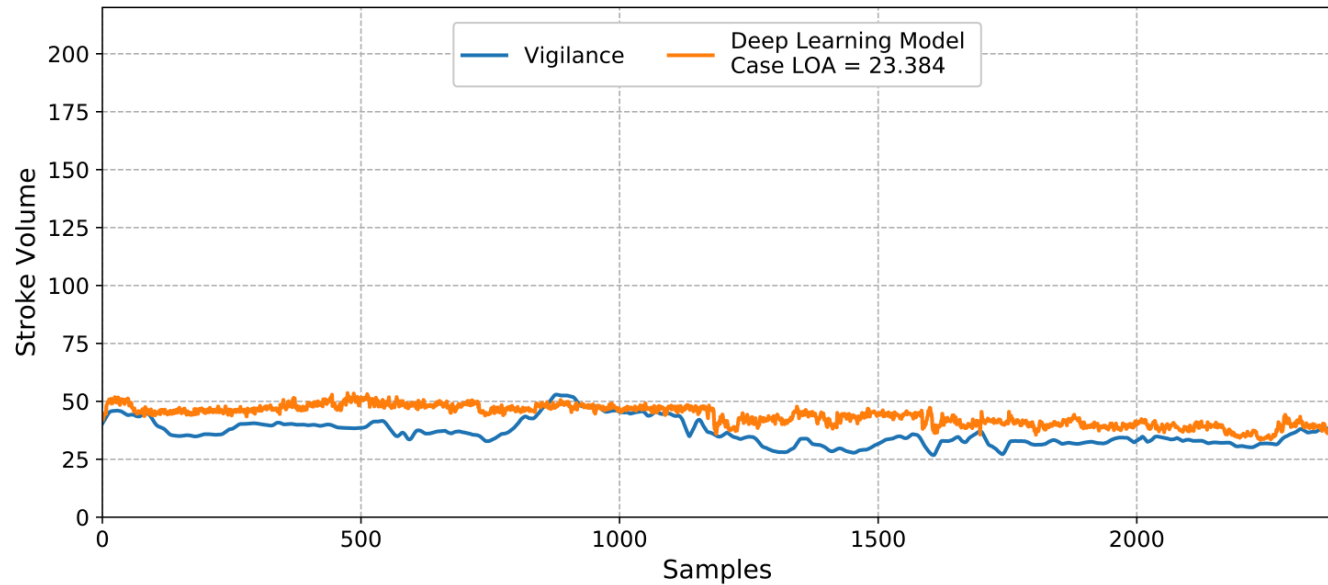

CaseID : Patient37 (anonymized)

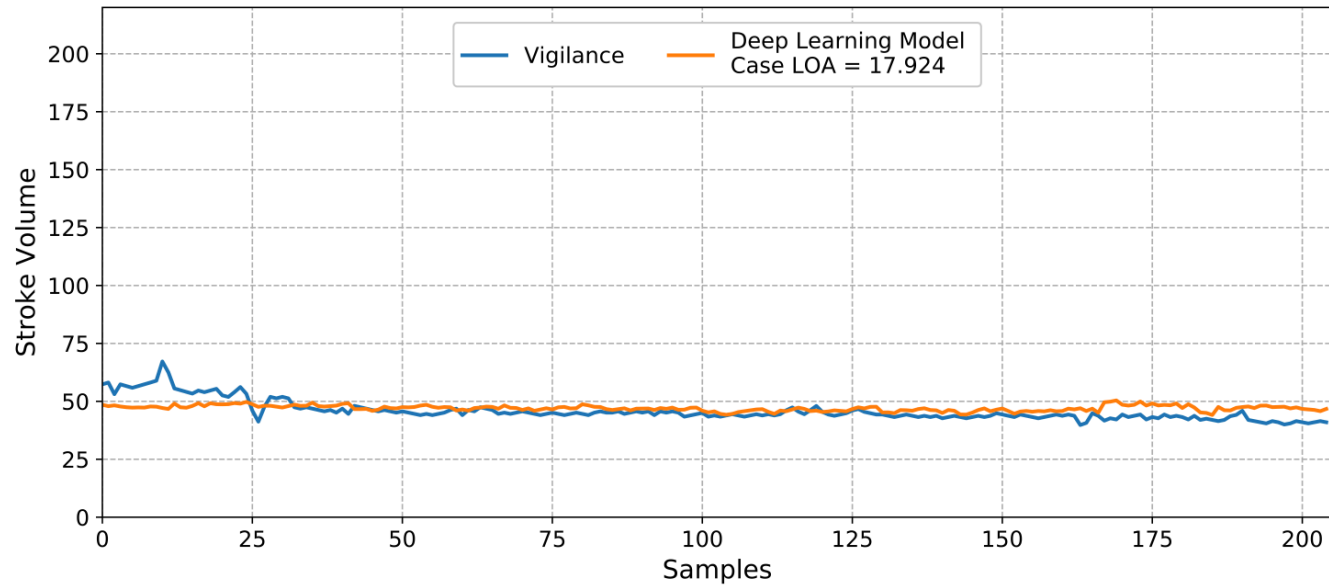

CaseID : Patient38 (anonymized)

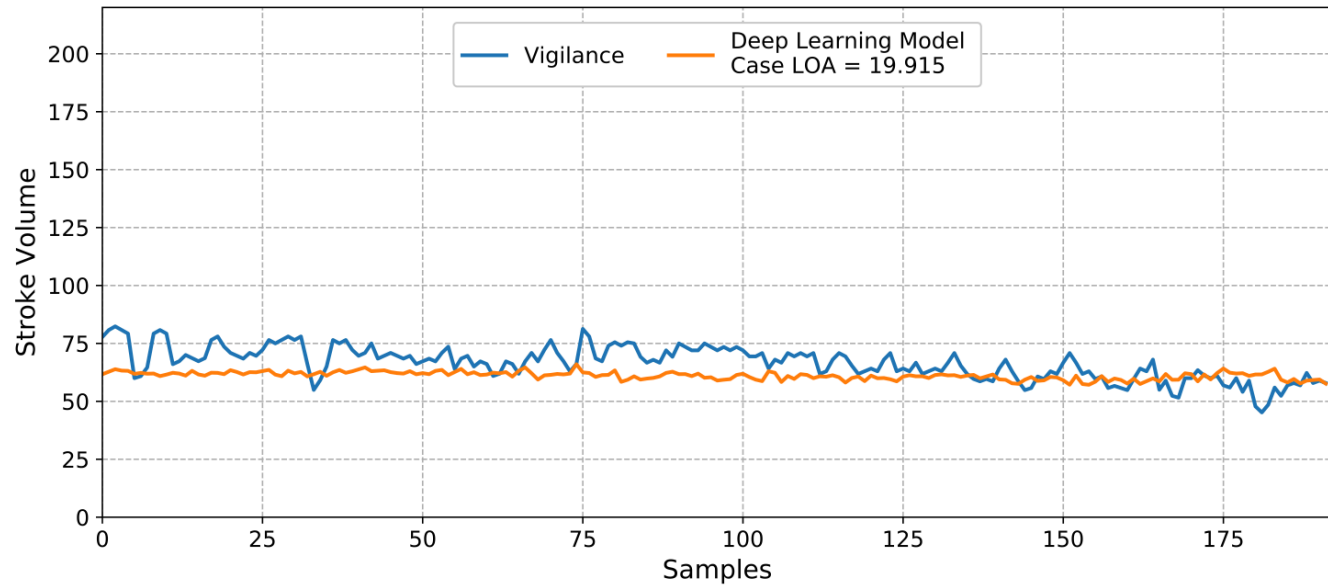

CaseID : Patient39 (anonymized)

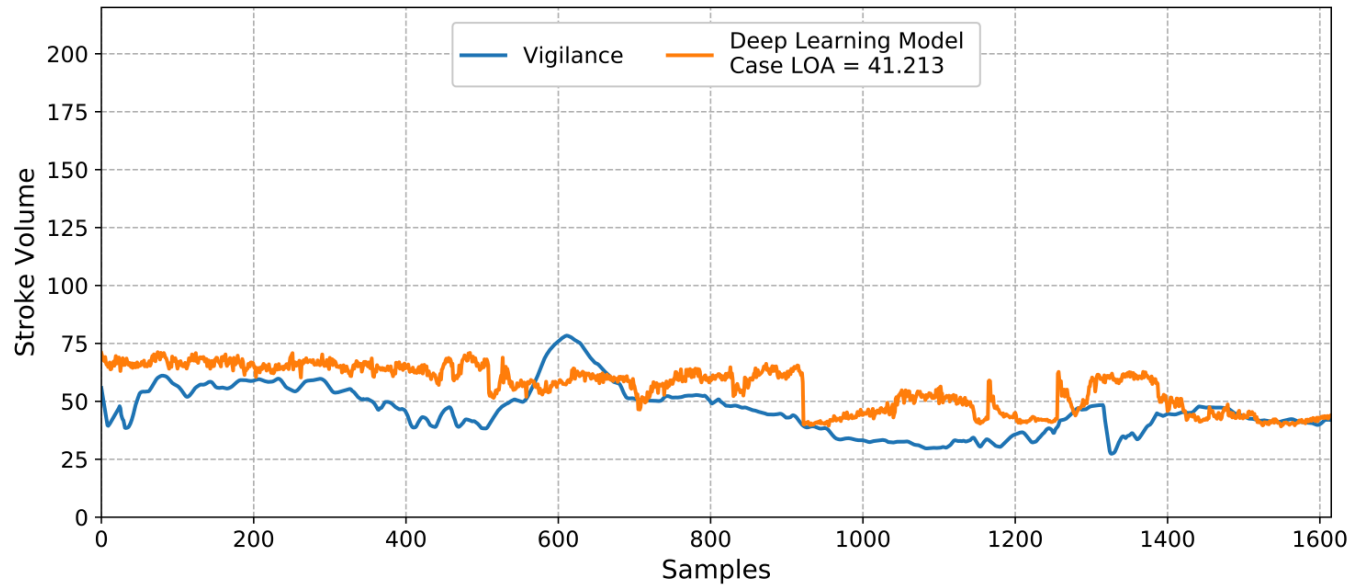

CaseID : Patient40 (anonymized)

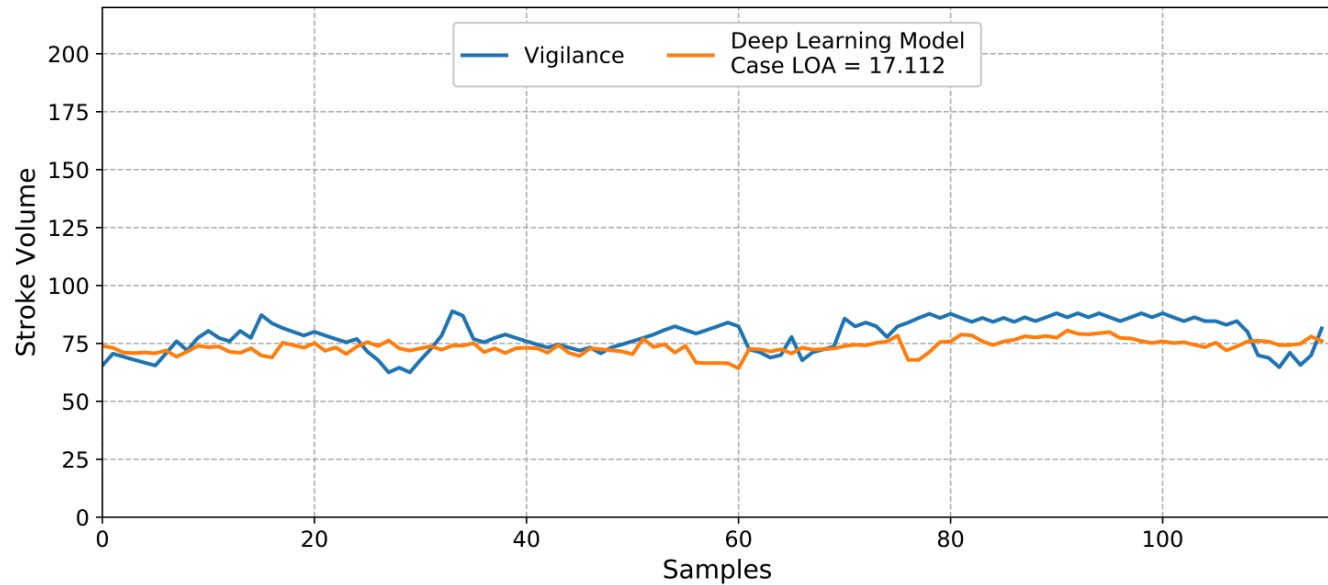

CaseID : Patient41 (anonymized)

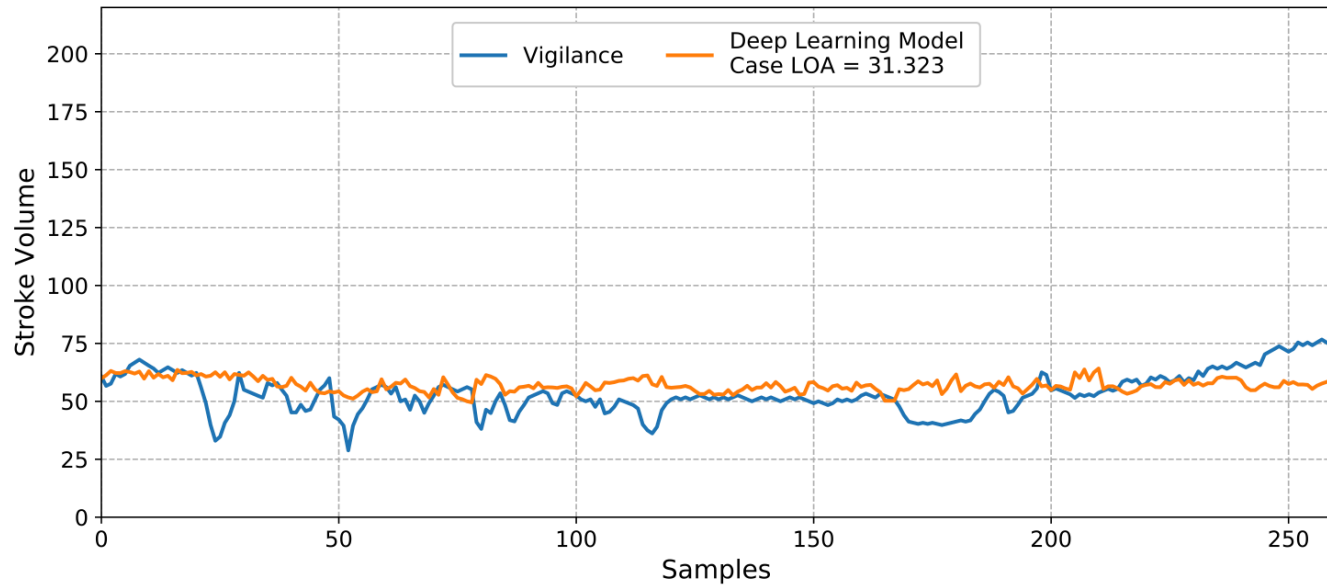

CaseID : Patient42 (anonymized)

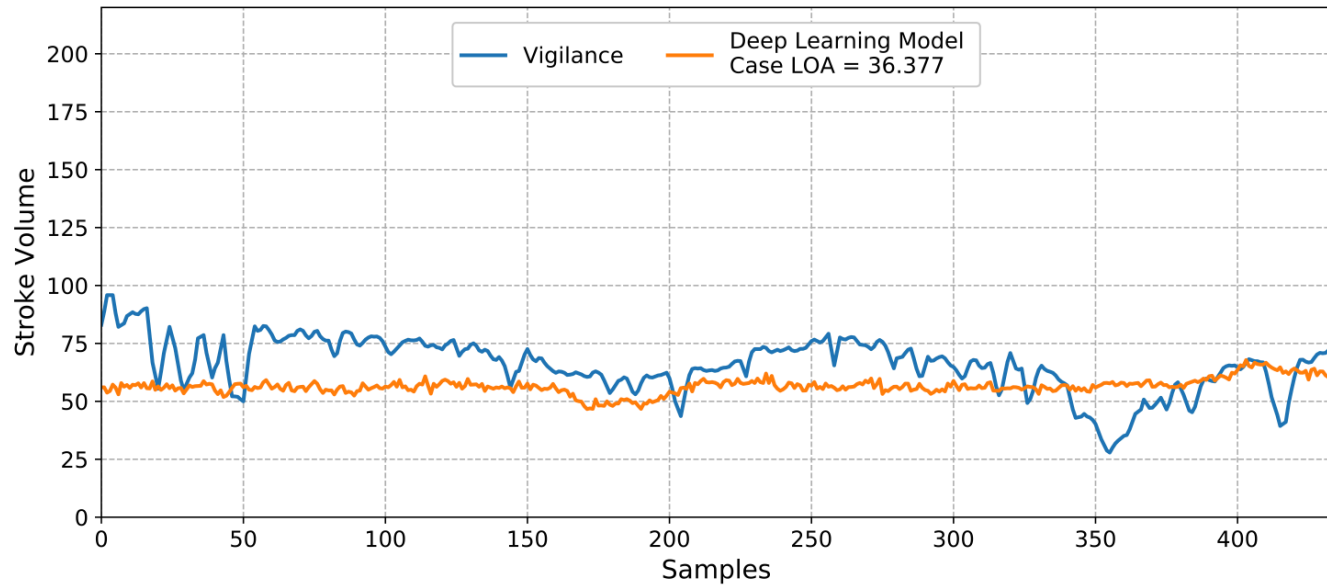

CaseID : Patient43 (anonymized)

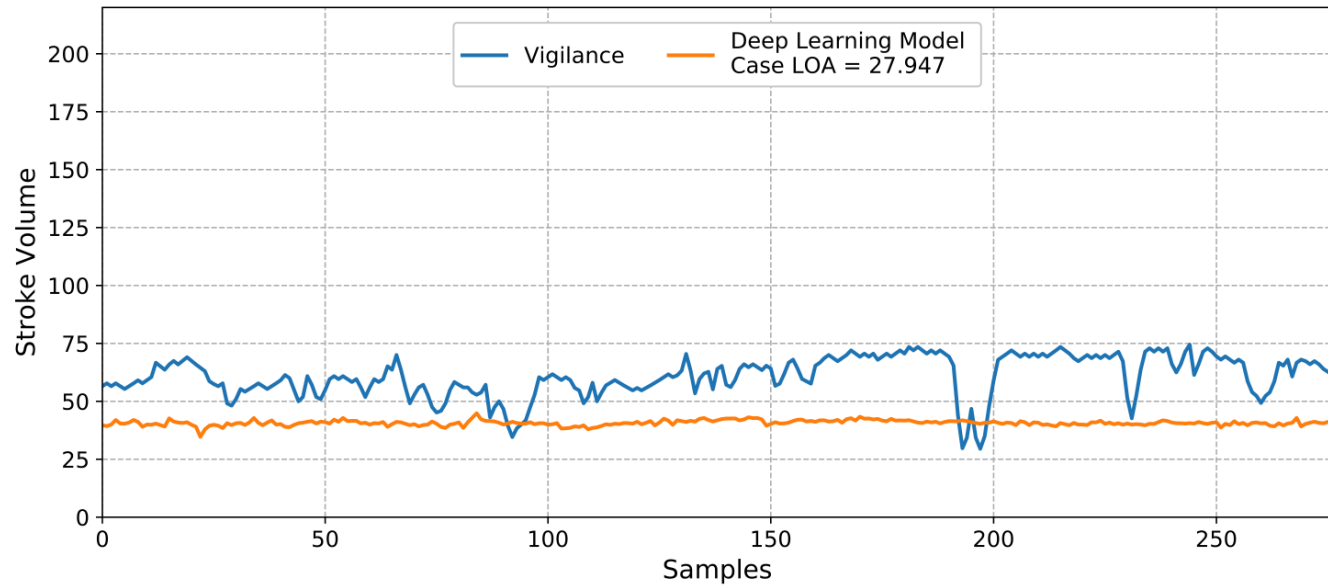



CaseID : Patient44 (anonymized)

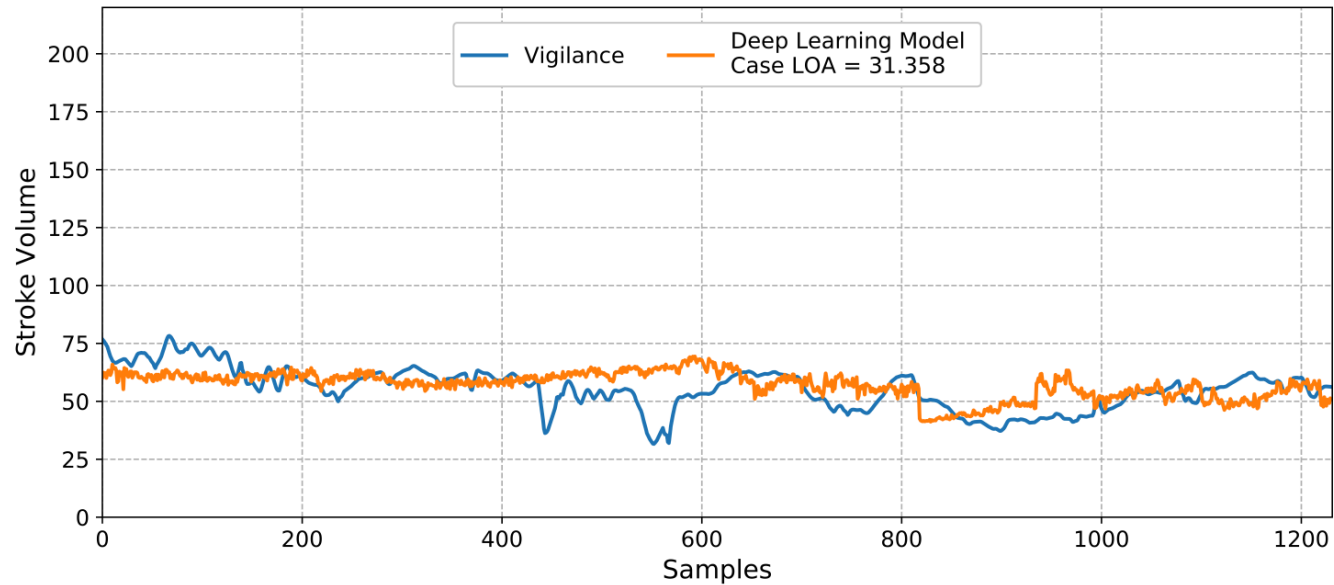

CaseID : Patient45 (anonymized)

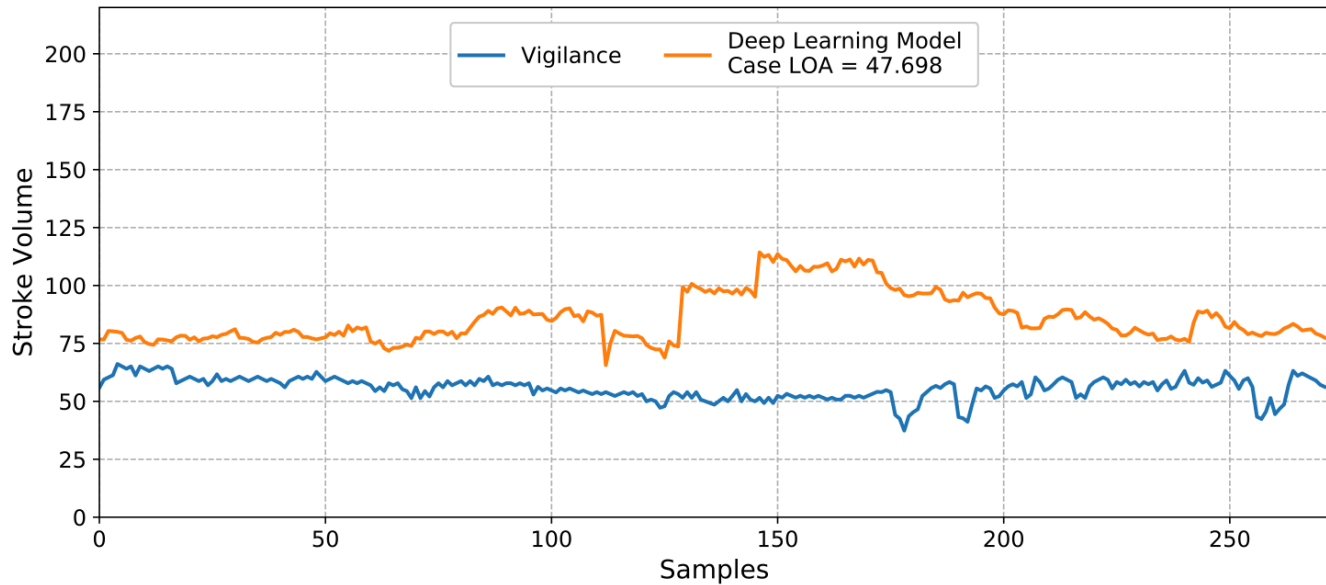

CaseID : Patient46 (anonymized)

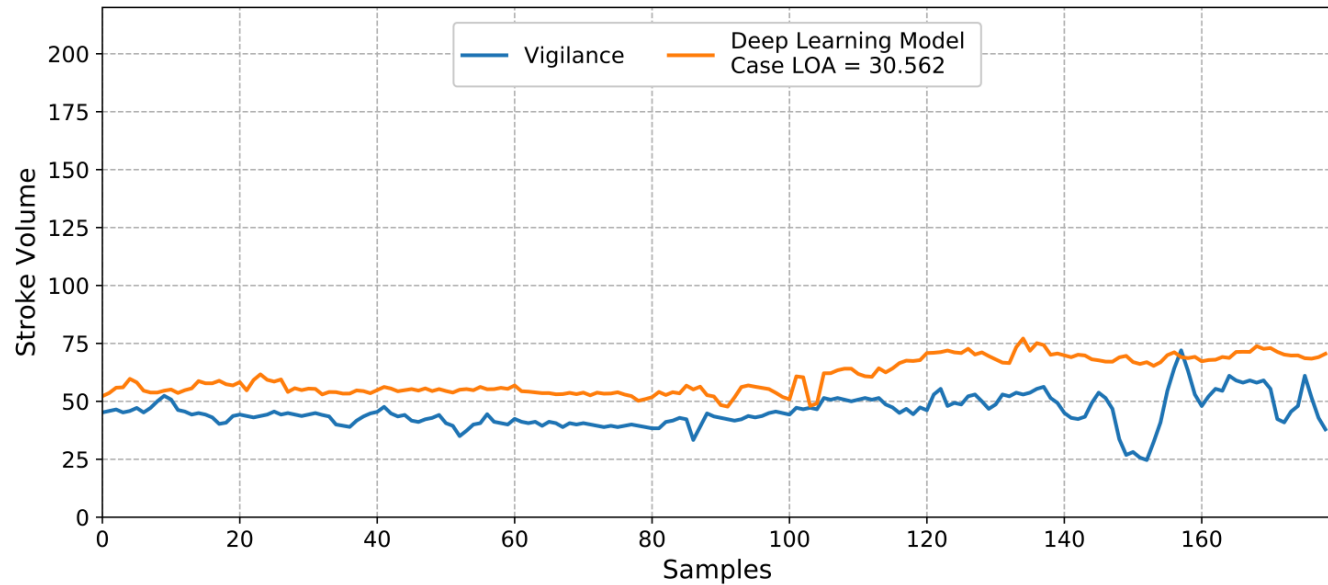

CaseID : Patient47 (anonymized)

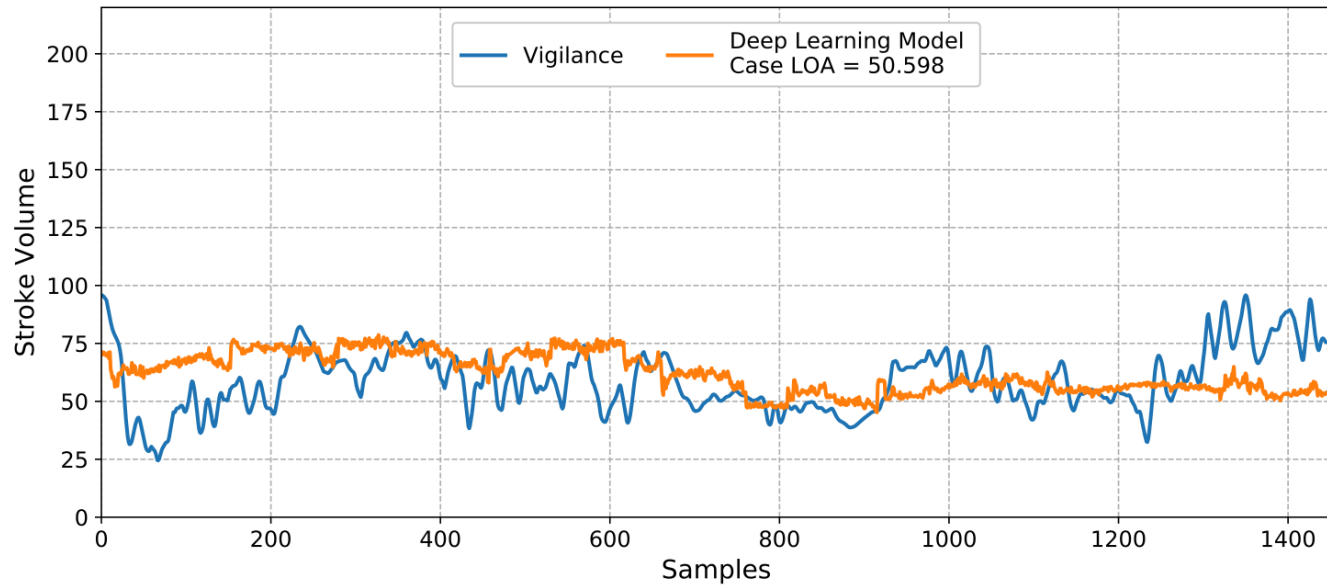

CaseID : Patient48 (anonymized)

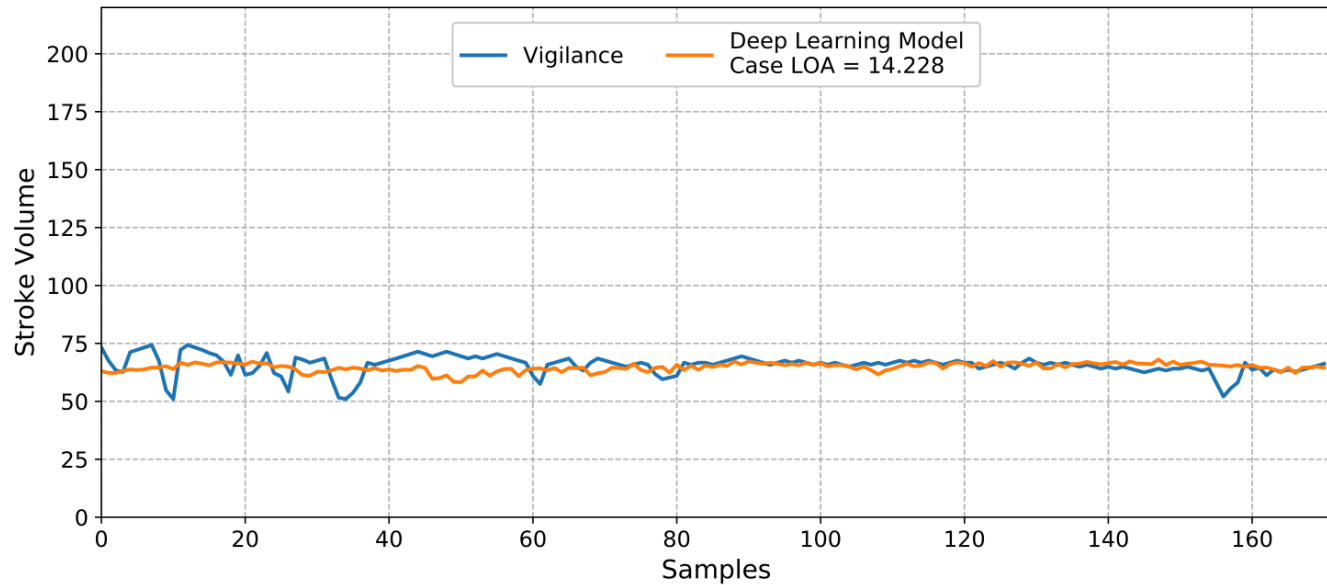

CaseID : Patient49 (anonymized)

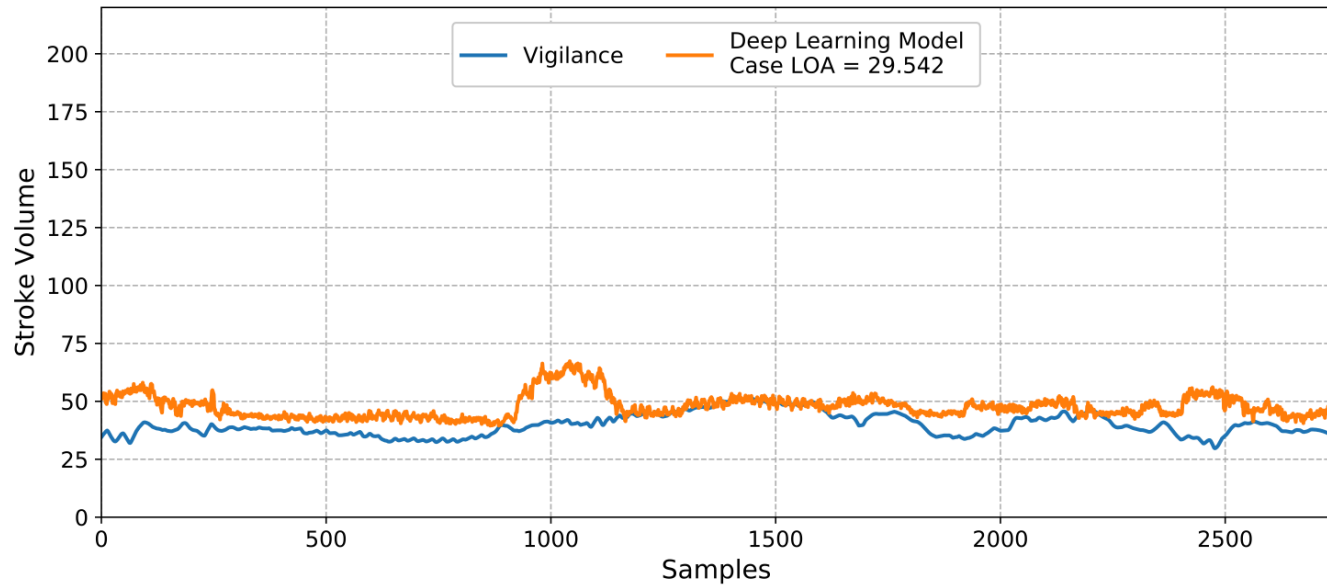

CaseID : Patient50 (anonymized)

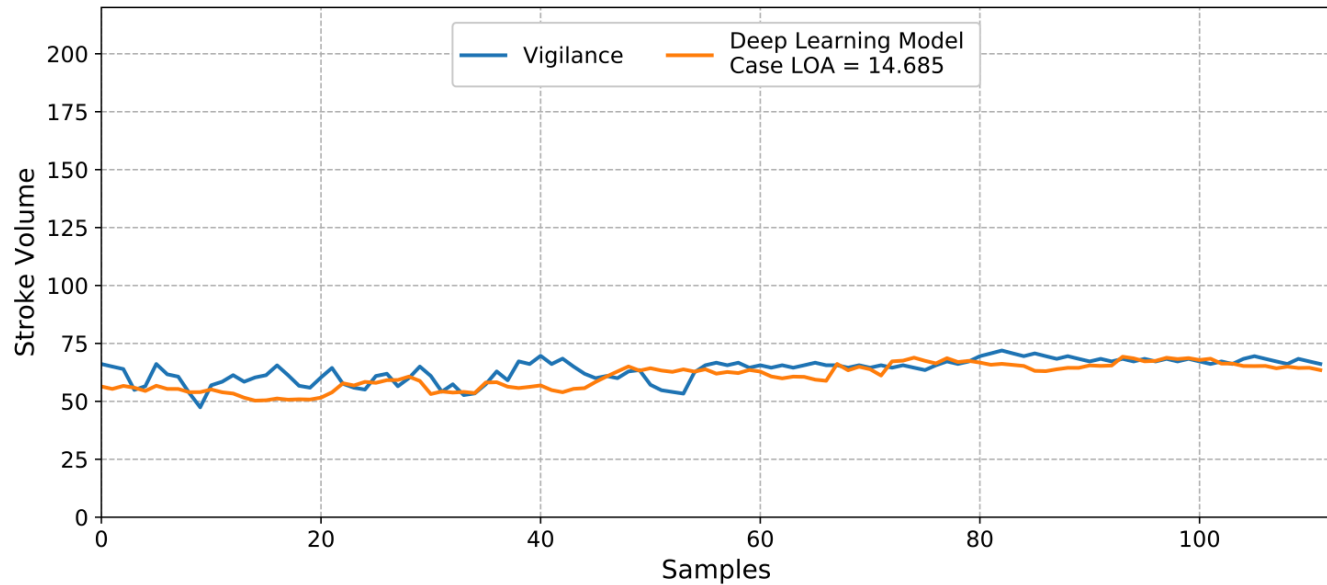

CaseID : Patient51 (anonymized)

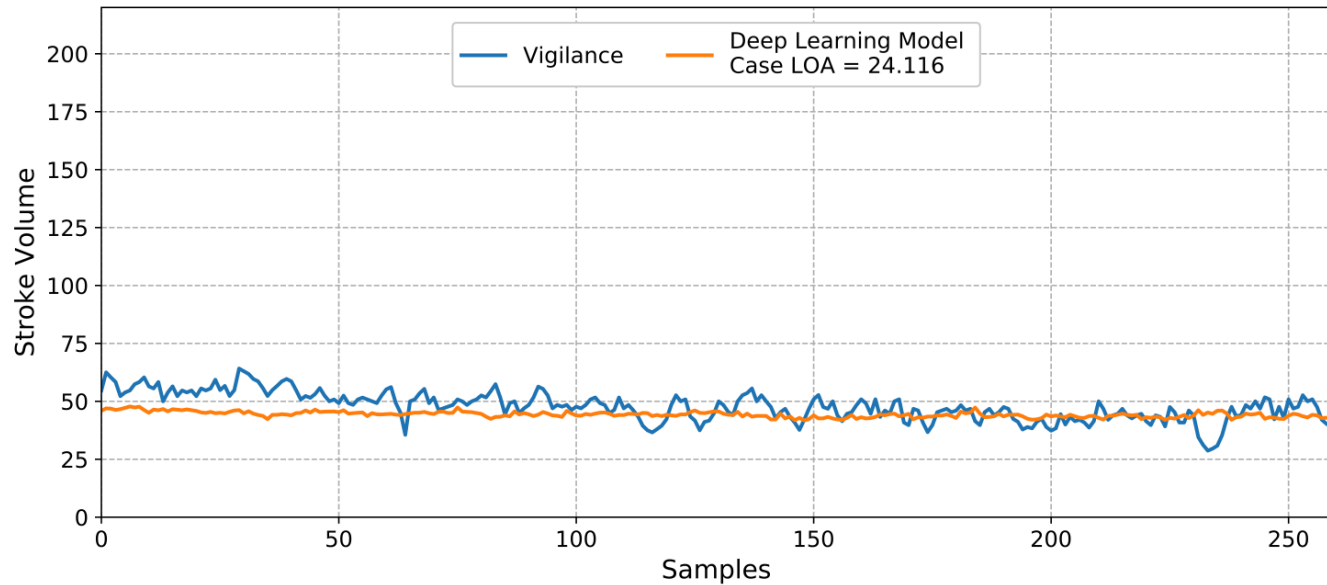



CaseID : Patient52 (anonymized)

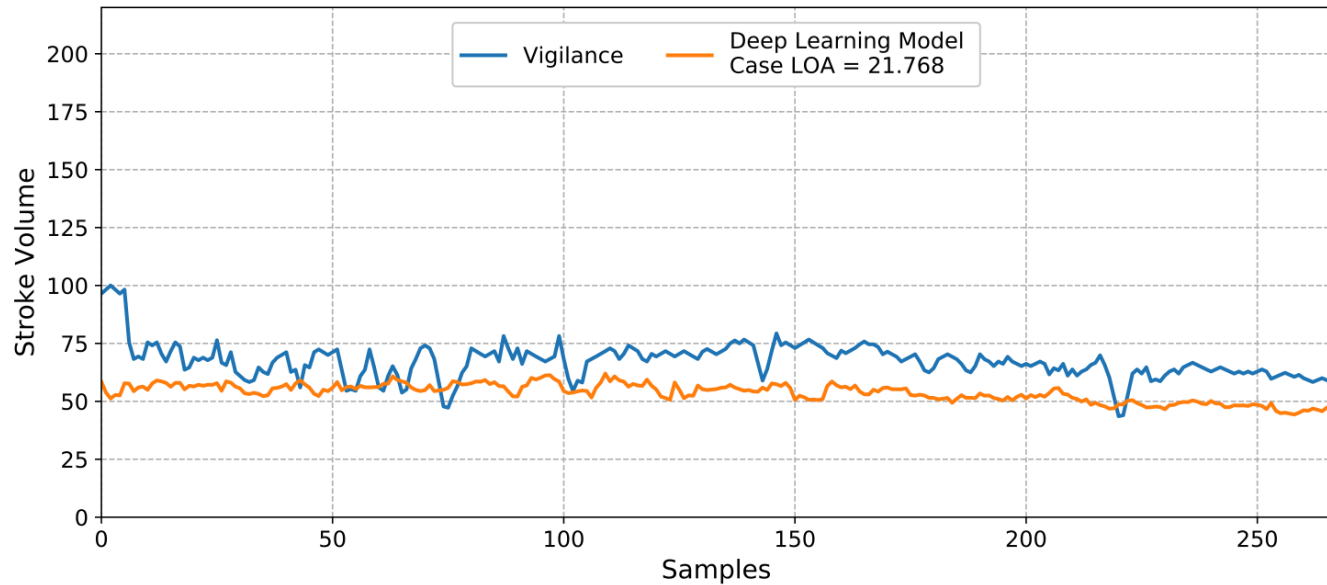

CaseID : Patient53 (anonymized)

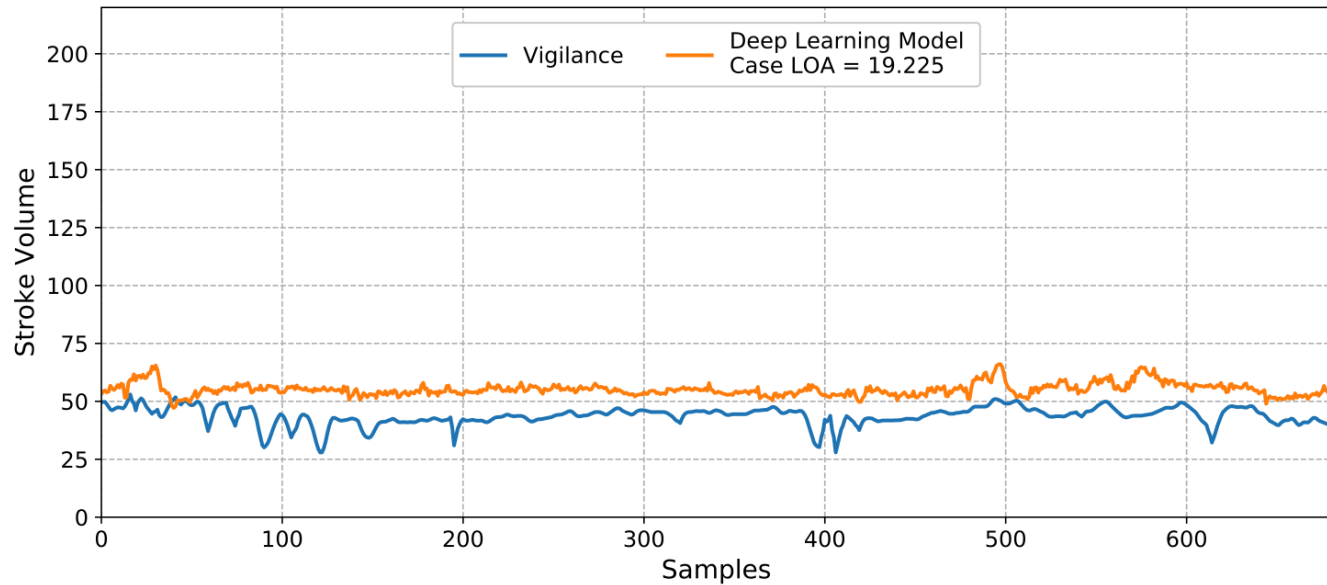

CaseID : Patient54 (anonymized)

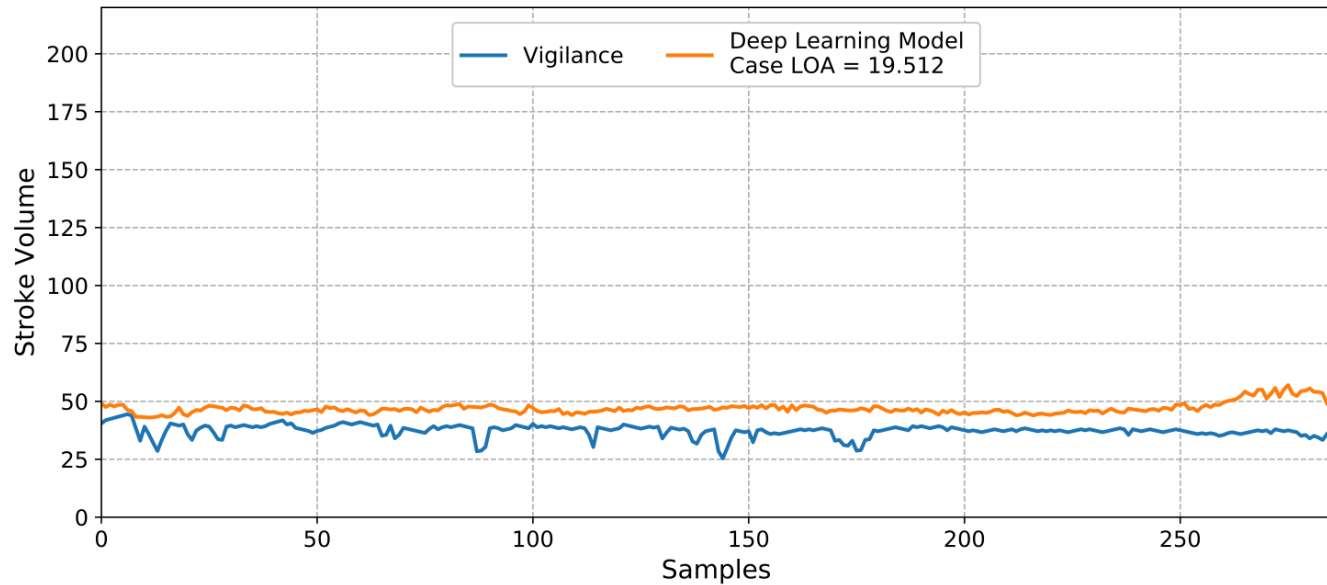

CaseID : Patient55 (anonymized)

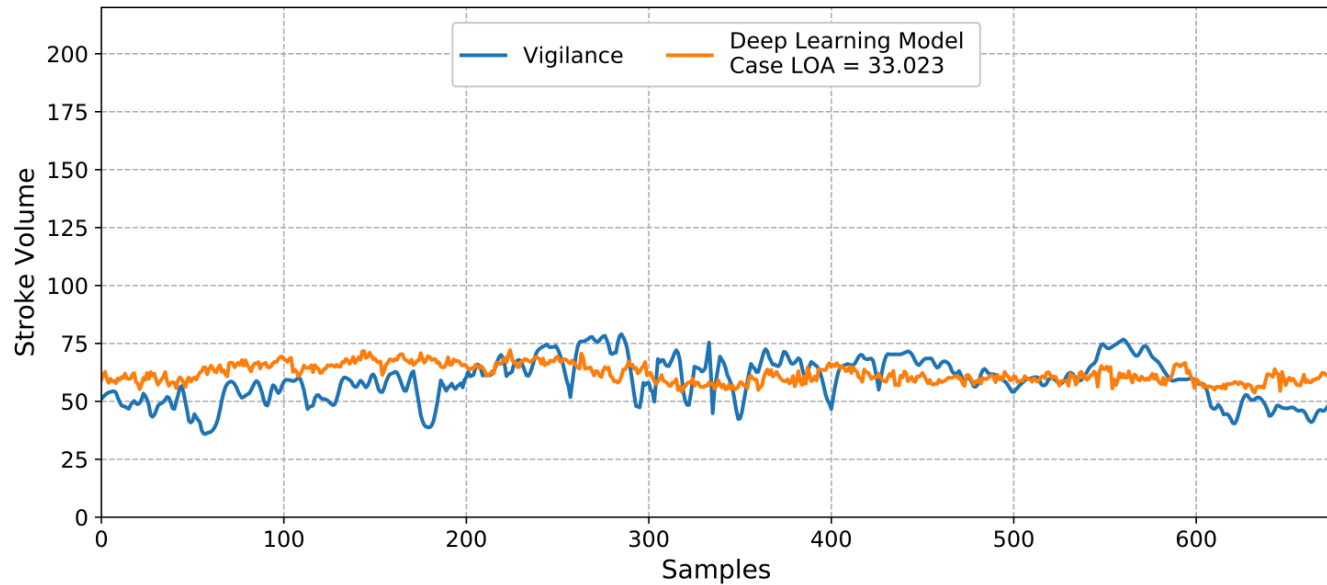

CaseID : Patient56 (anonymized)

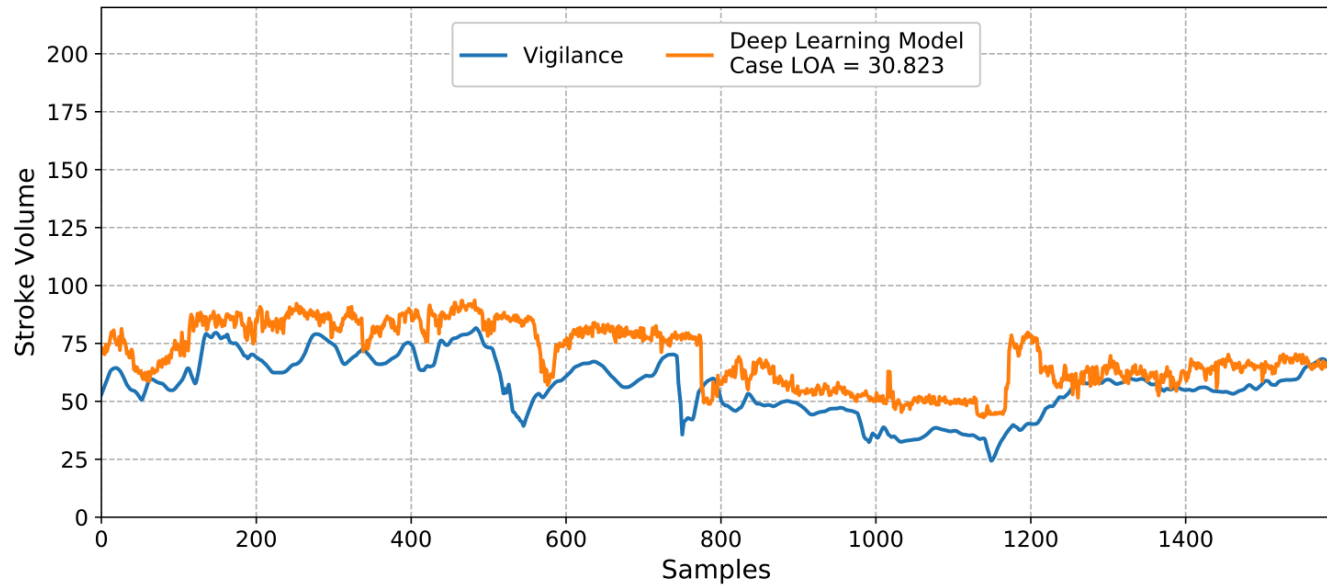

CaseID : Patient57 (anonymized)

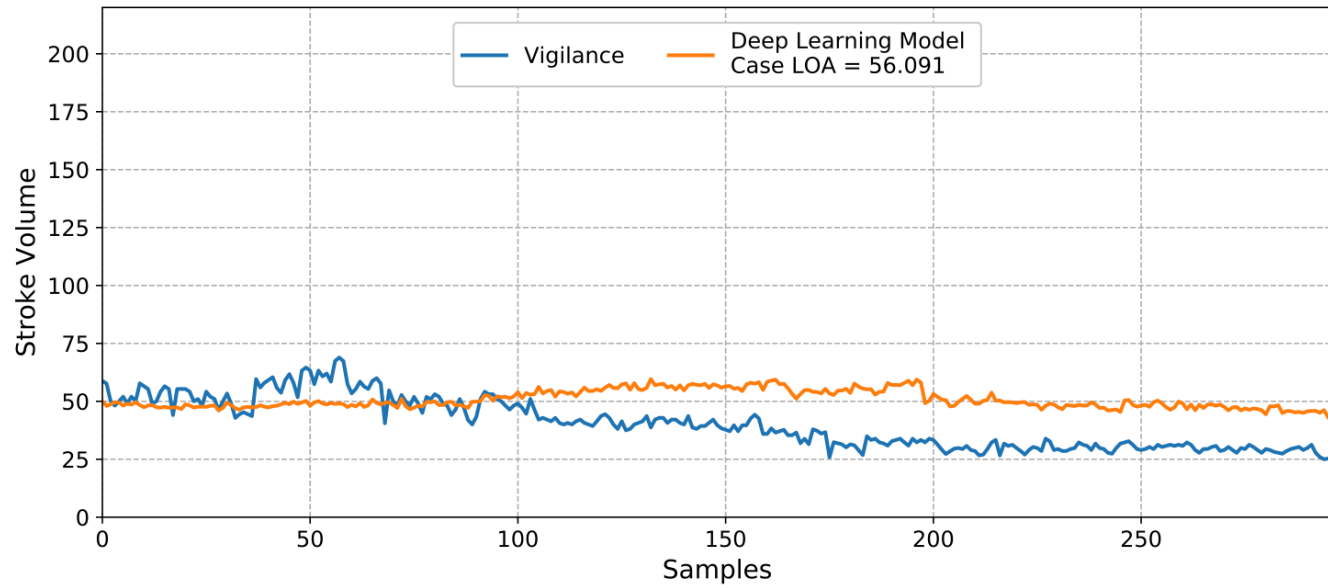

CaseID : Patient58 (anonymized)

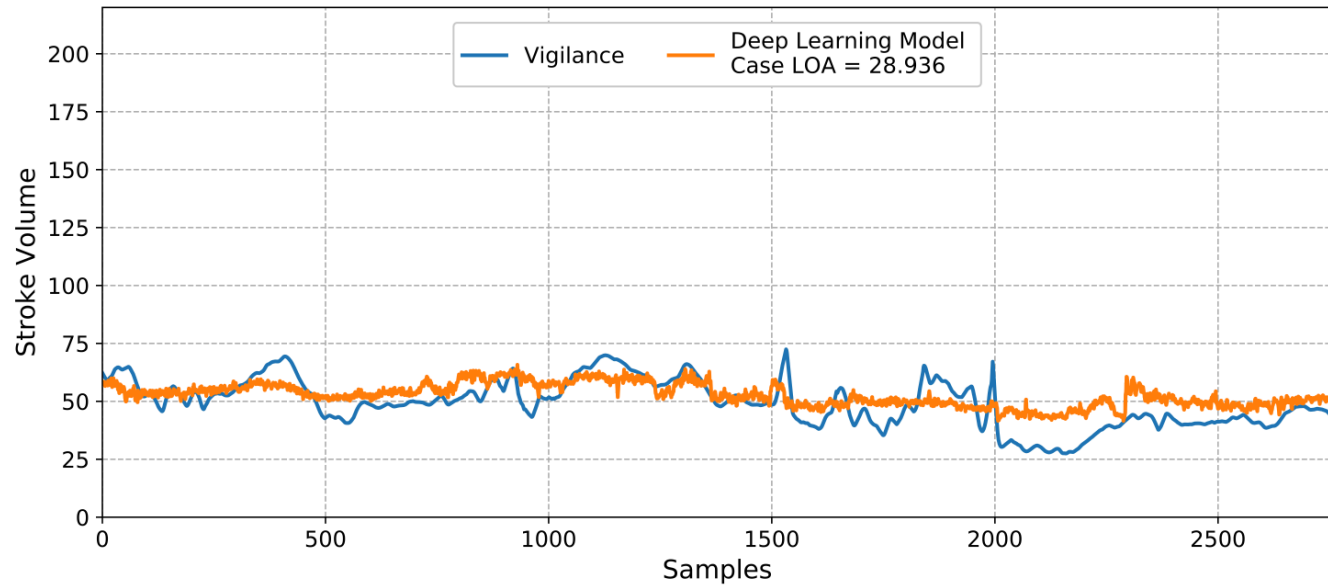

CaseID : Patient59 (anonymized)

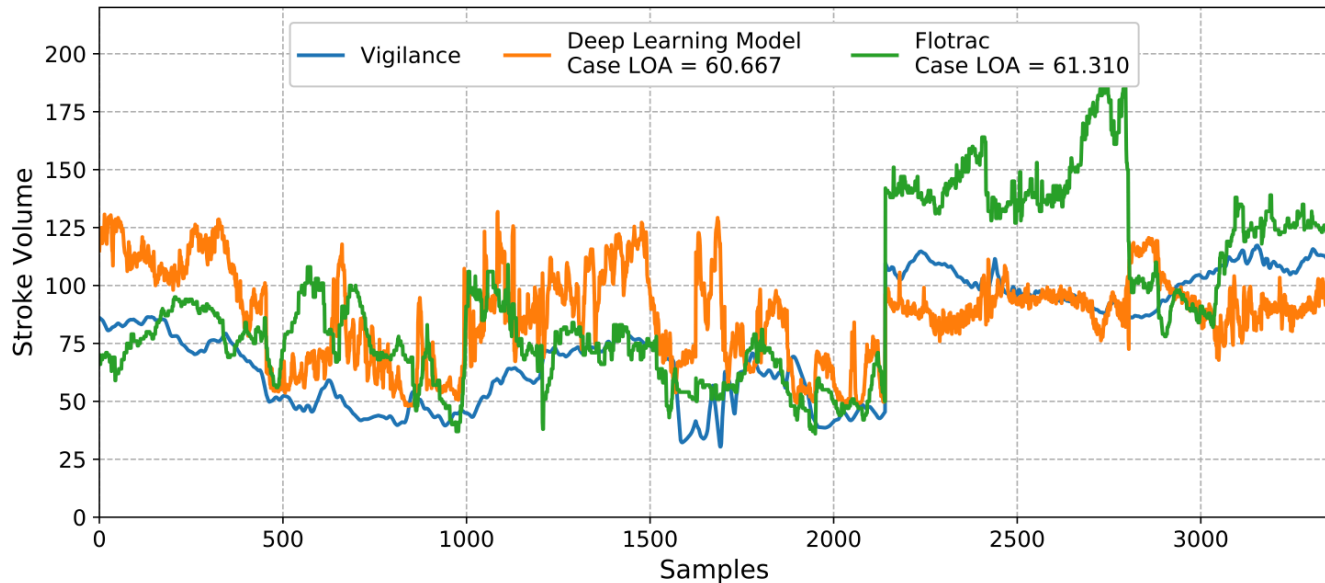



CaseID : Patient60 (anonymized)

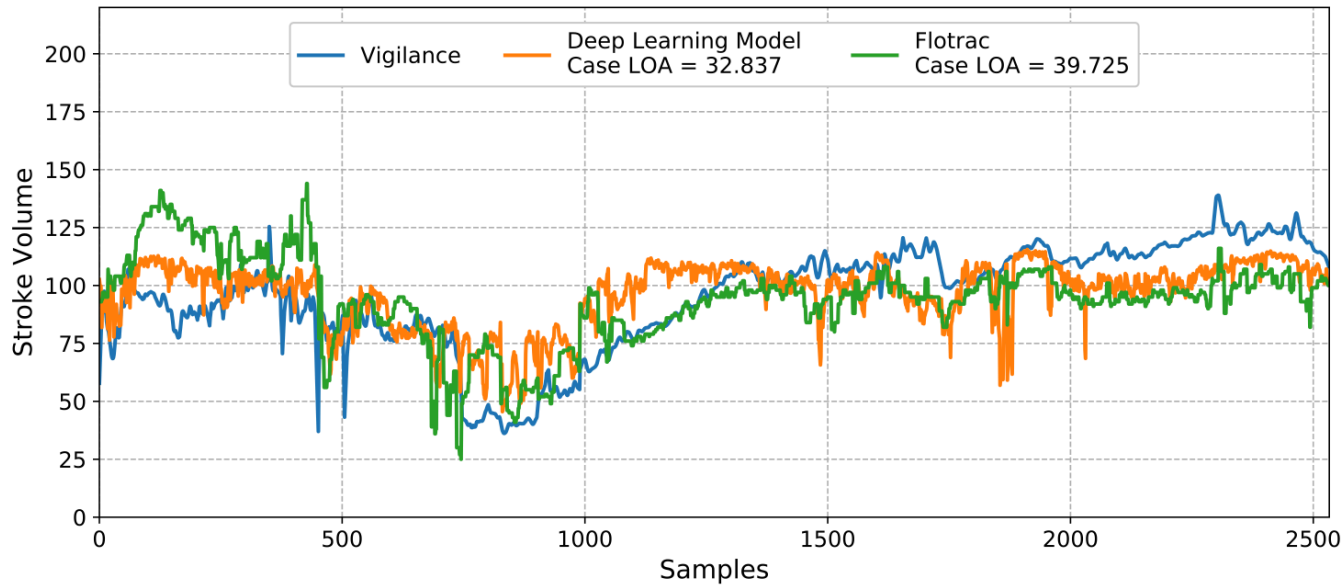

CaseID : Patient61 (anonymized)

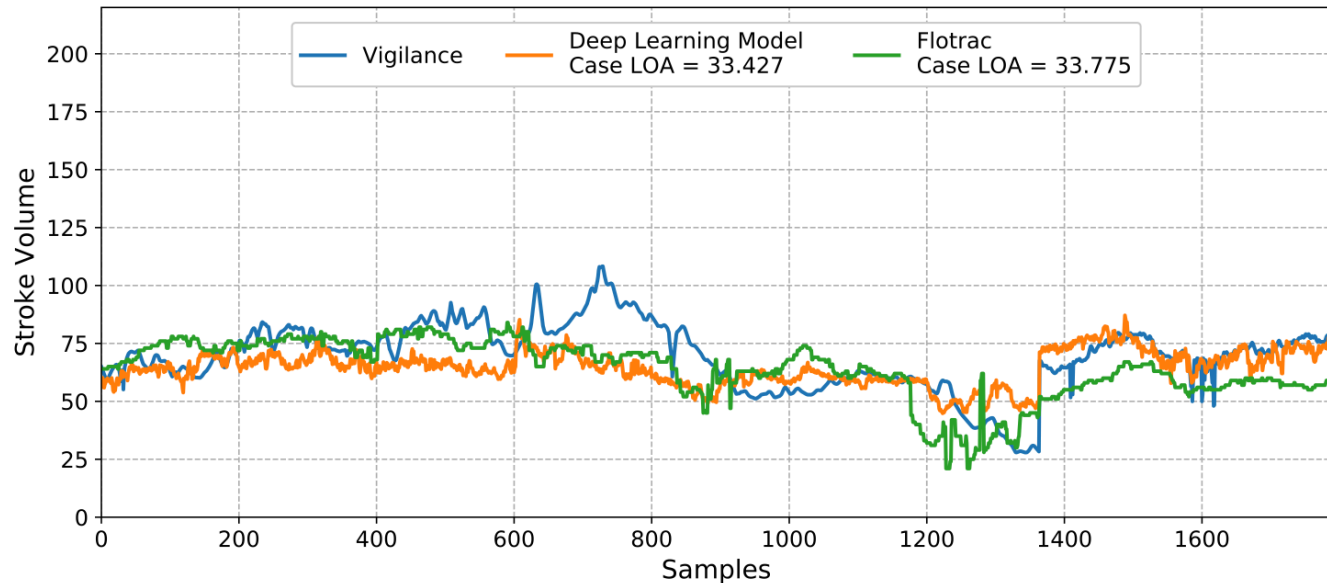

CaseID : Patient62 (anonymized)

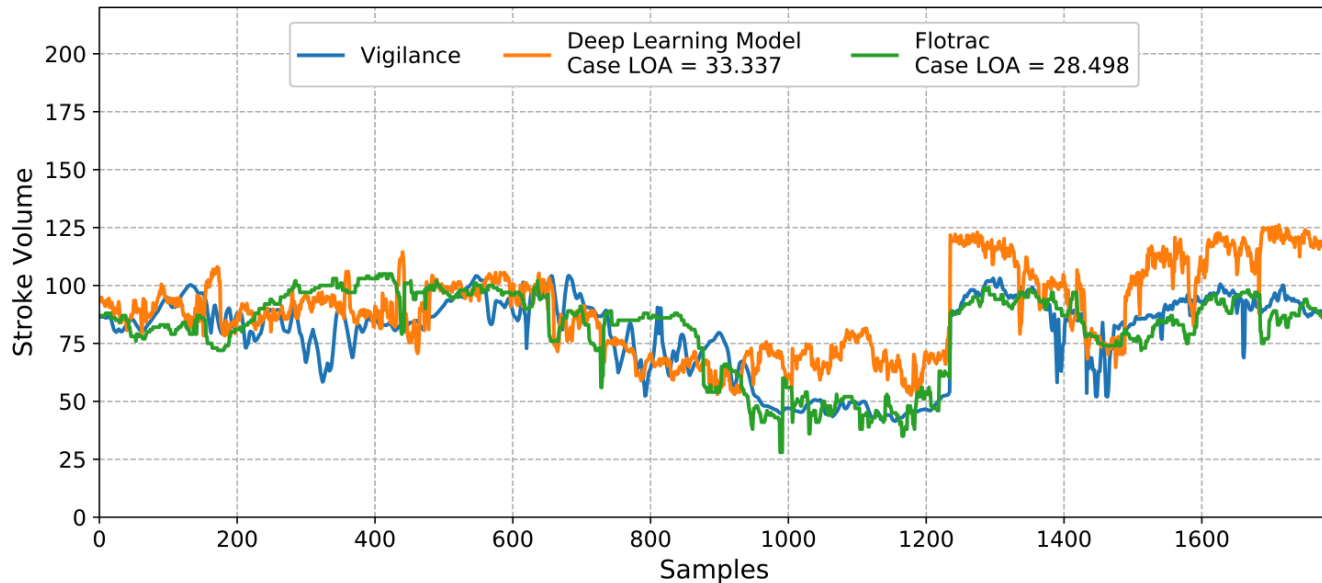

CaseID : Patient63 (anonymized)

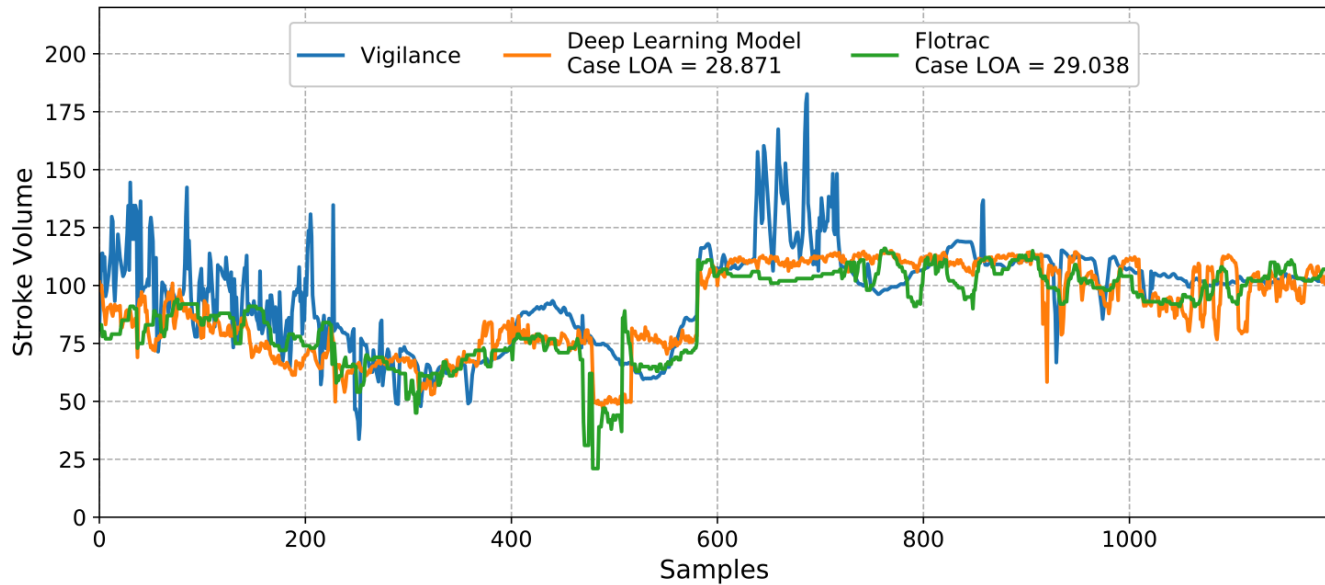

CaseID : Patient64 (anonymized)

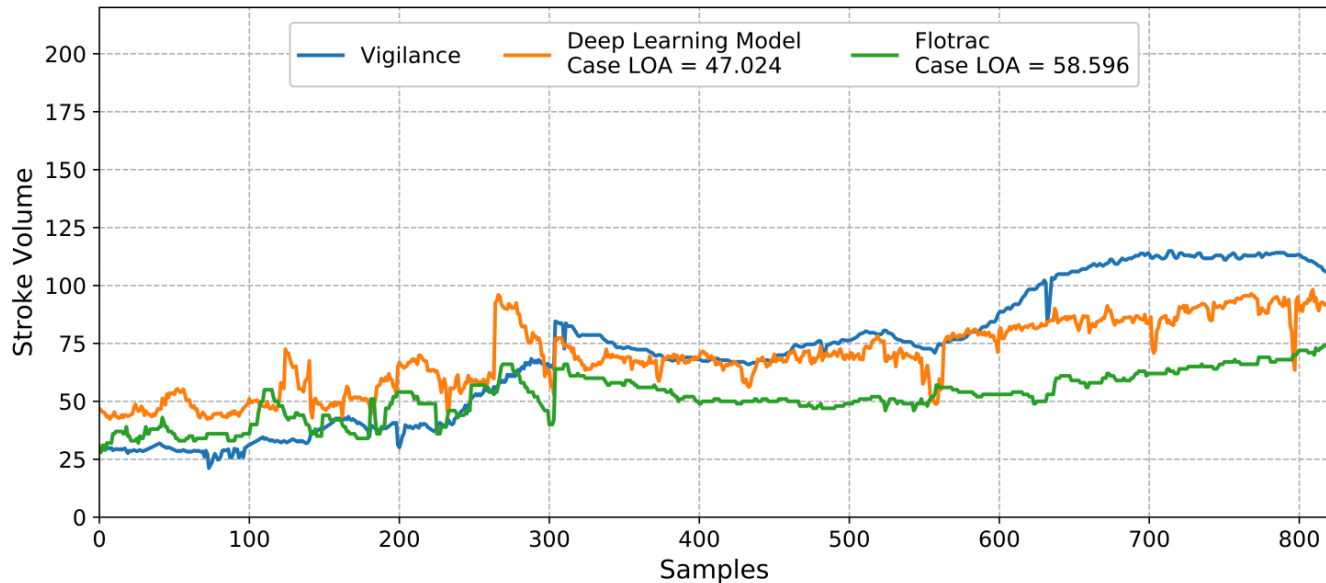

CaseID : Patient65 (anonymized)

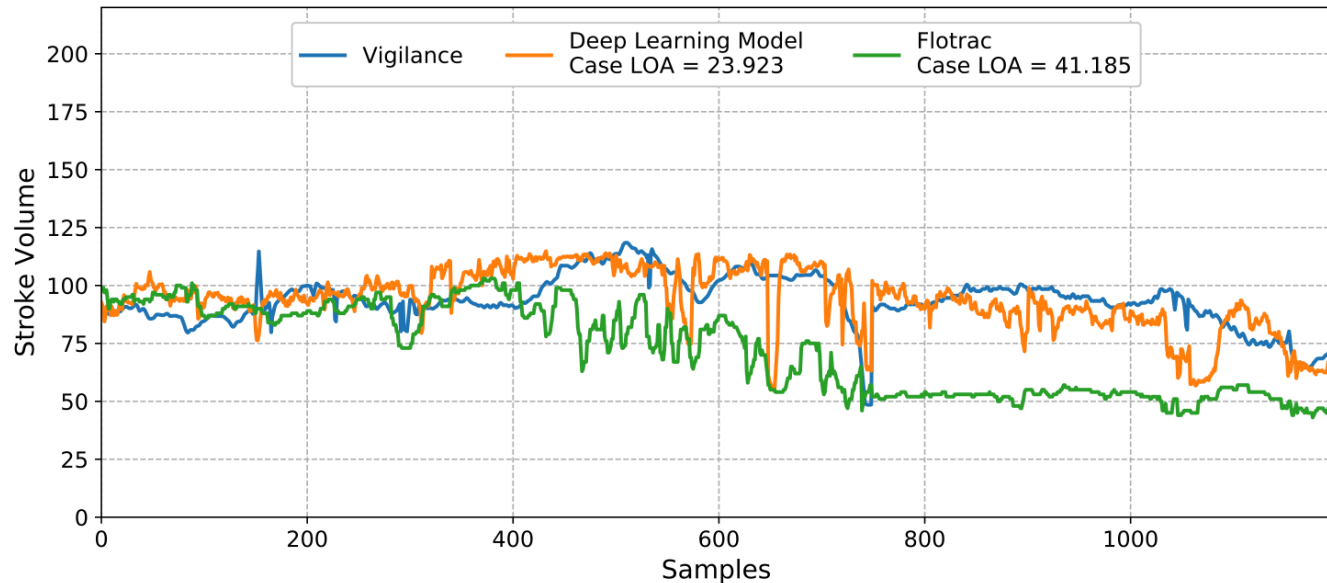

CaseID : Patient66 (anonymized)

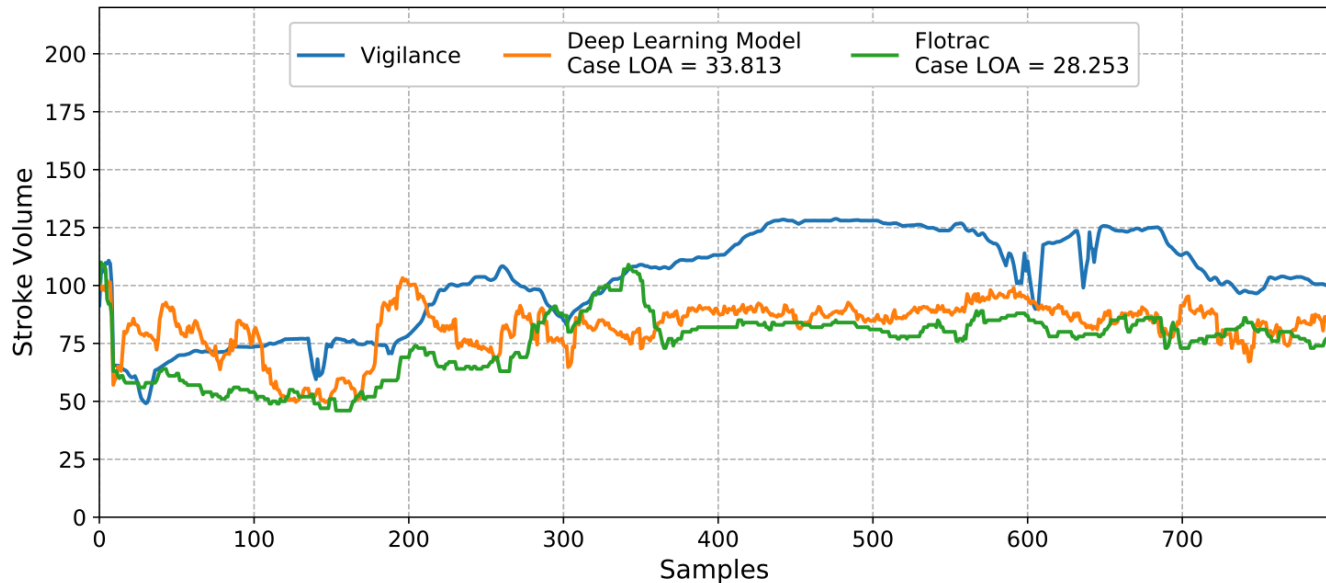

CaseID : Patient67 (anonymized)

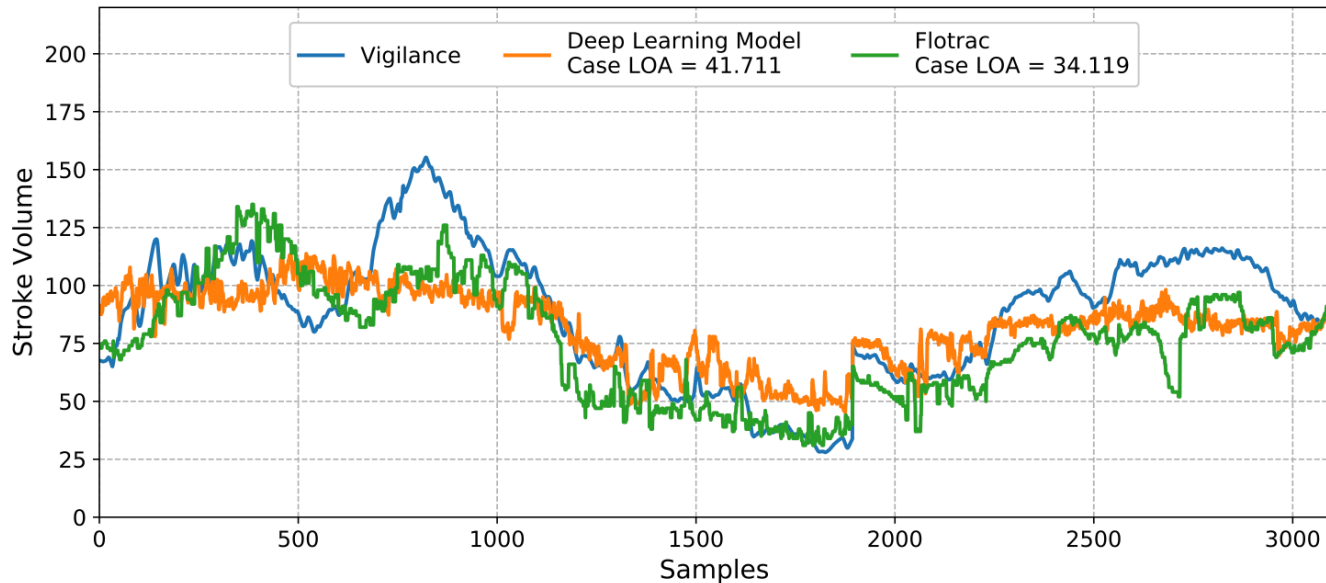



CaseID : Patient68 (anonymized)

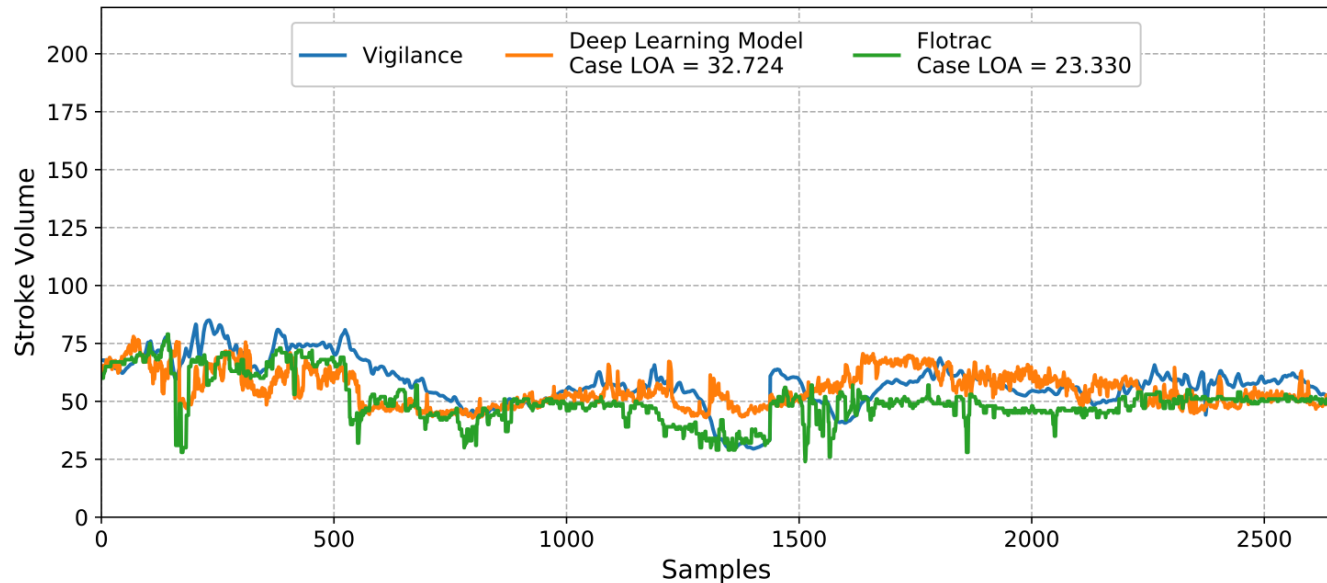

CaseID : Patient69 (anonymized)

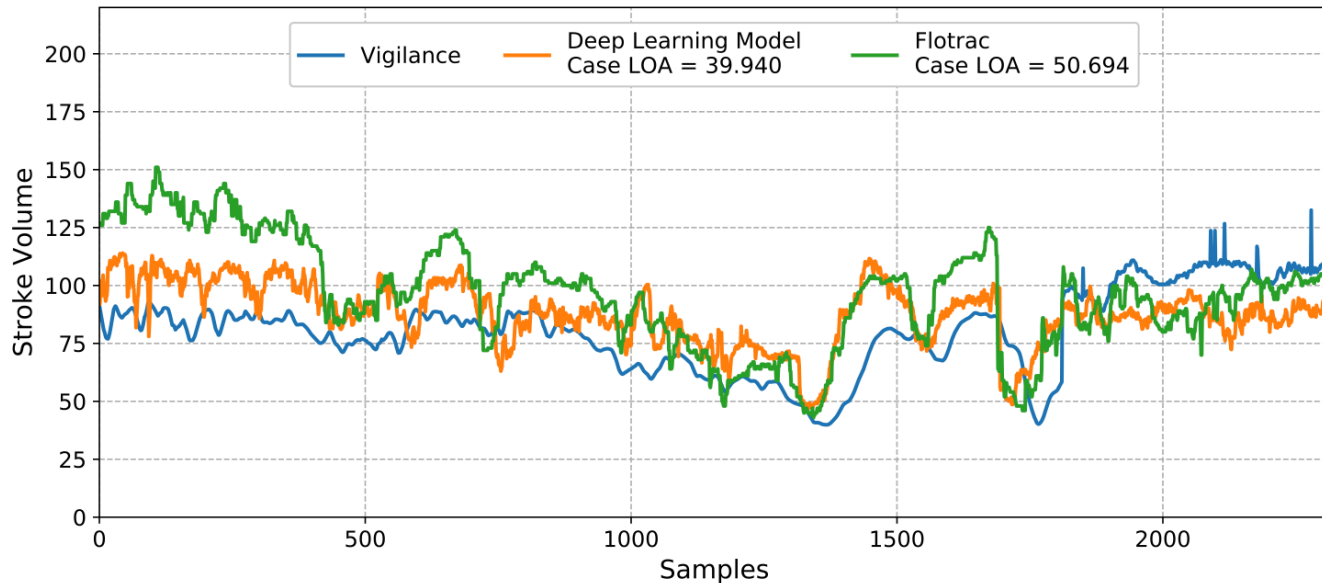

CaseID : Patient70 (anonymized)

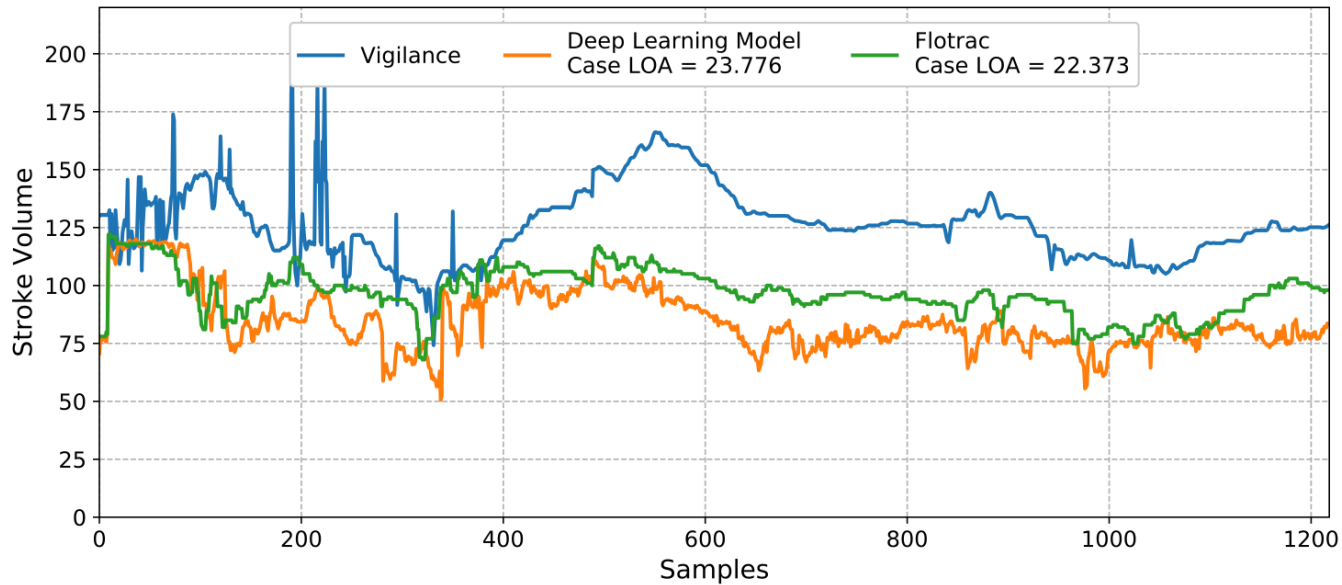

CaseID : Patient71 (anonymized)

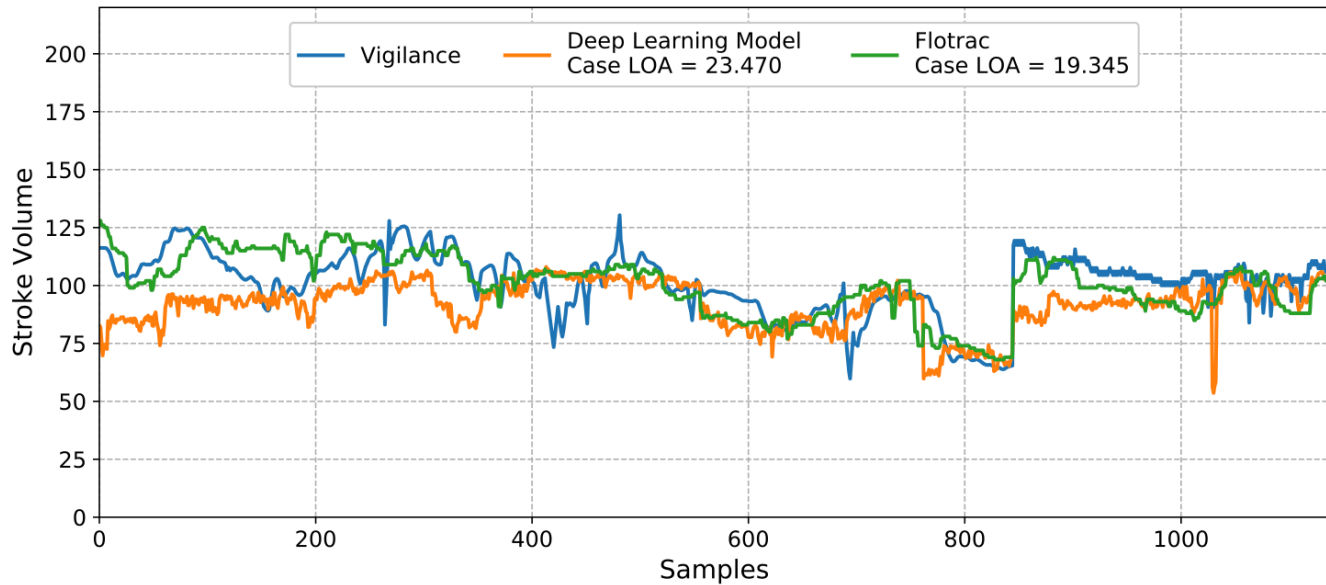

CaseID : Patient72 (anonymized)

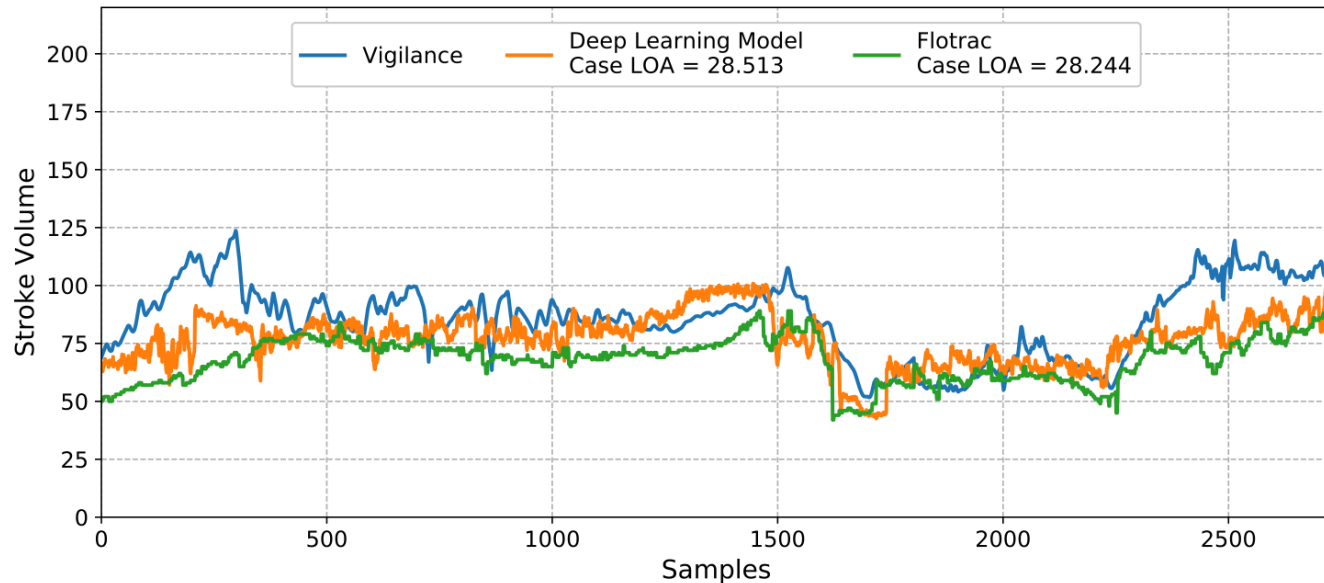

CaseID : Patient73 (anonymized)

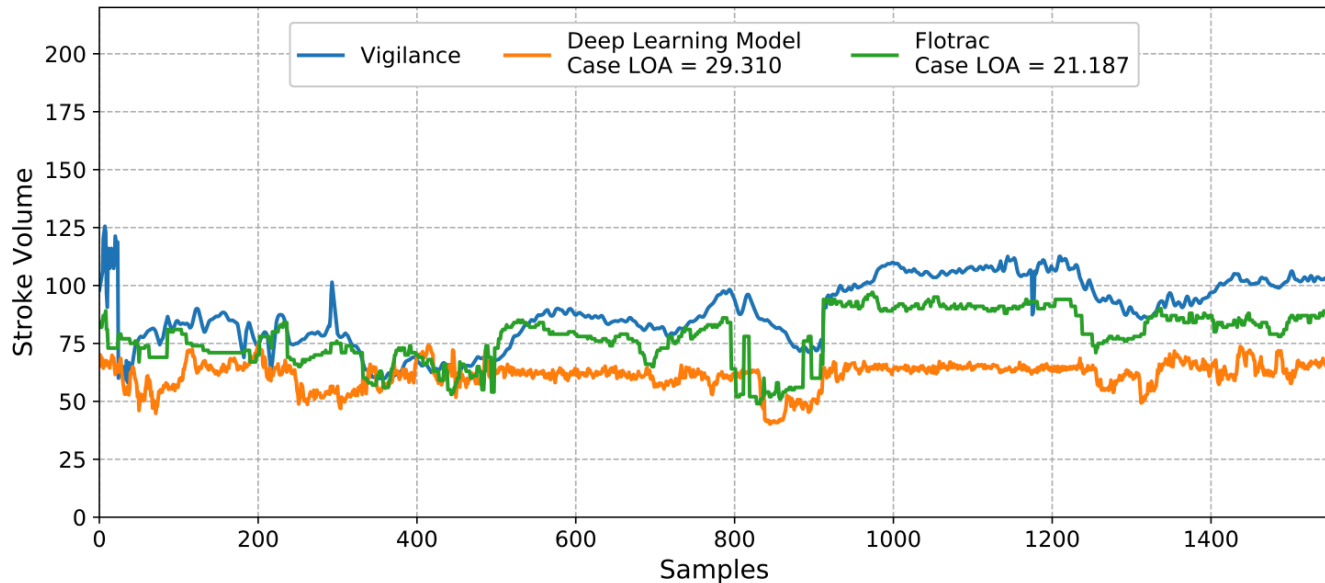

CaseID : Patient74 (anonymized)

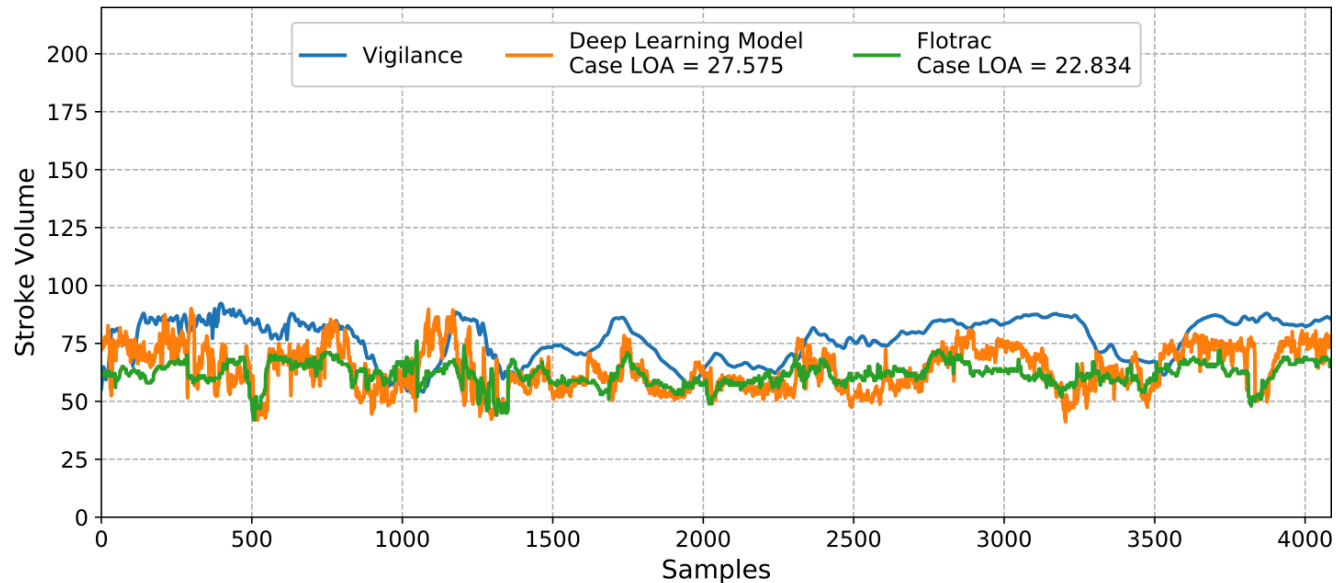

CaseID : Patient75 (anonymized)

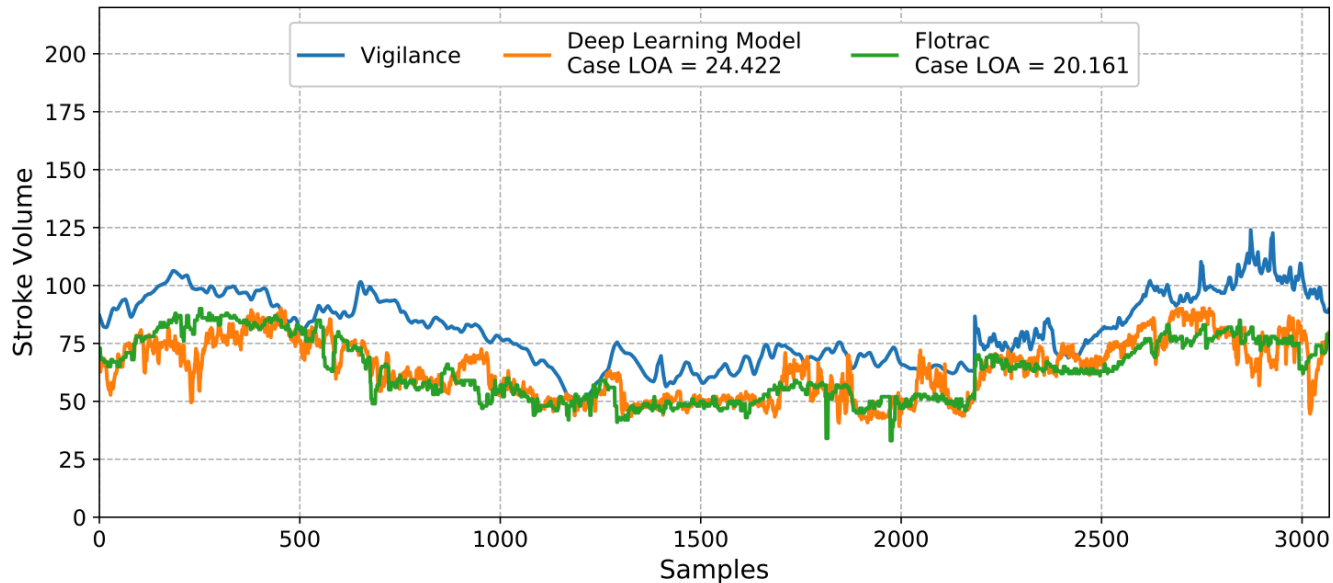



CaseID : Patient76 (anonymized)

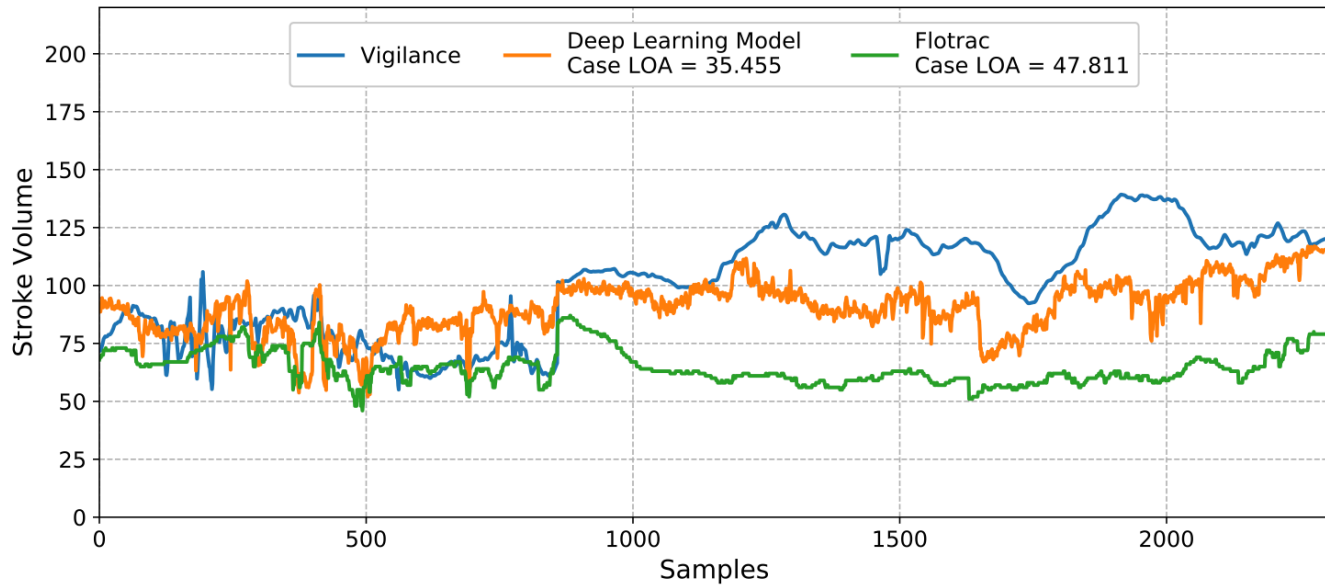

CaseID : Patient77 (anonymized)

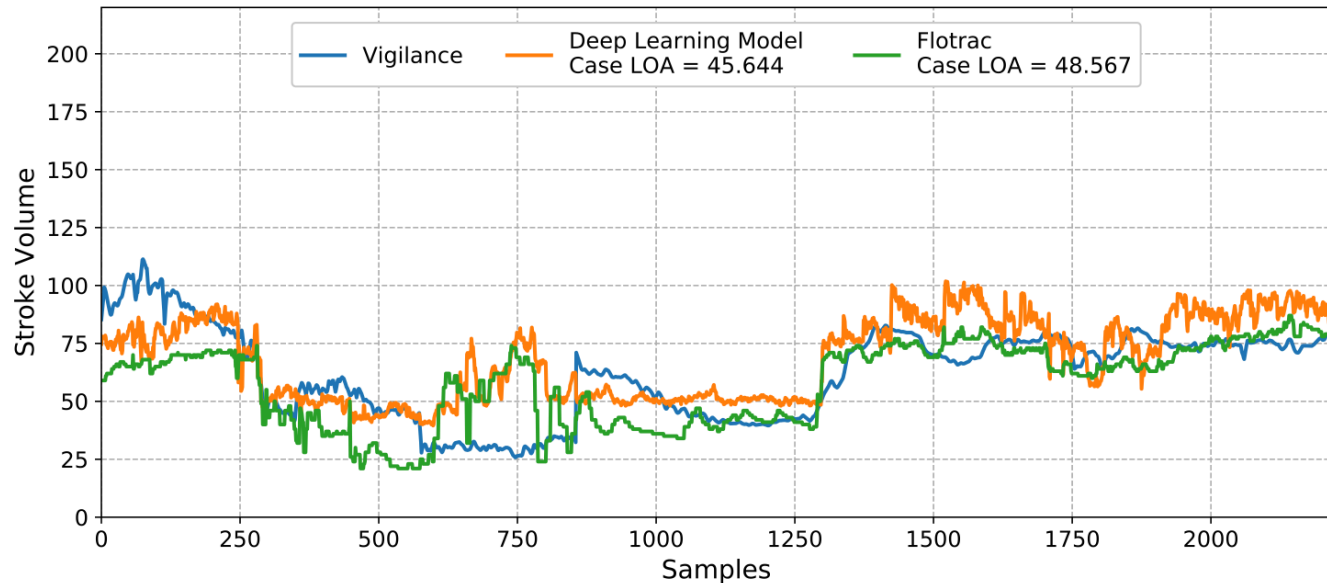

CaseID : Patient78 (anonymized)

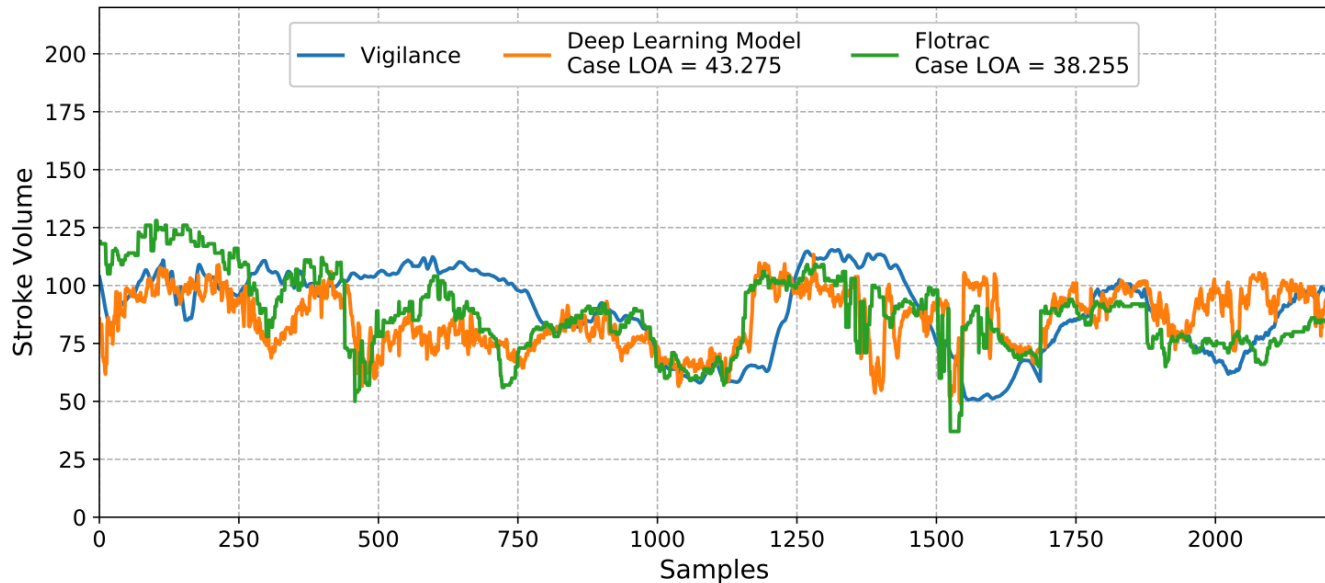

CaseID : Patient79 (anonymized)

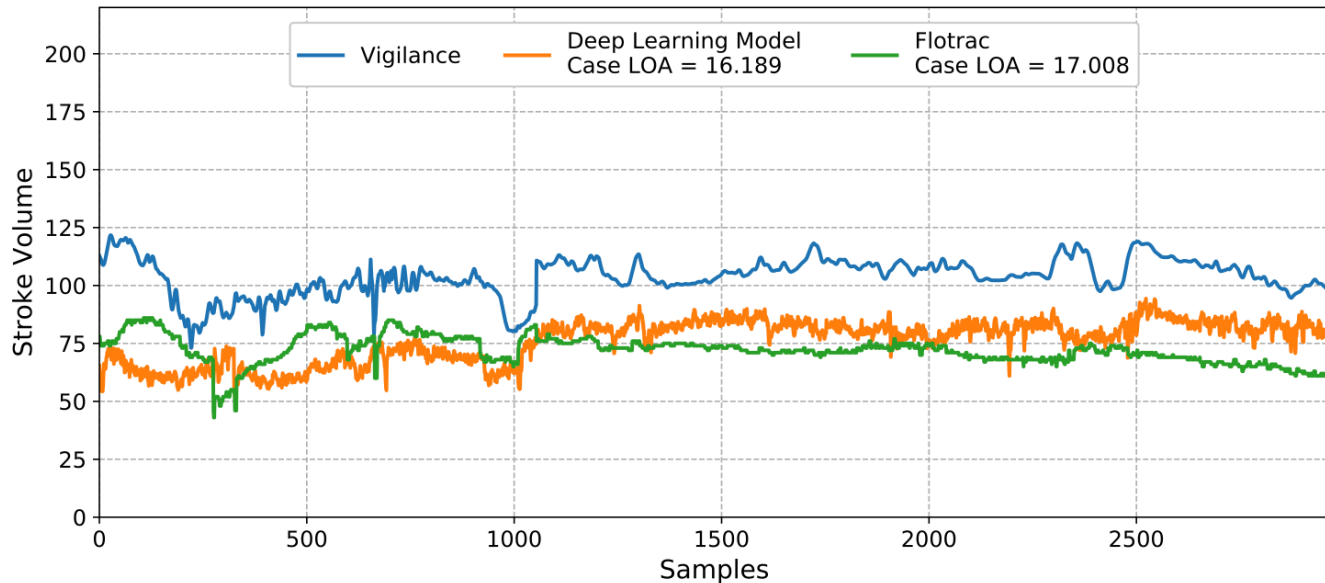

CaseID : Patient80 (anonymized)

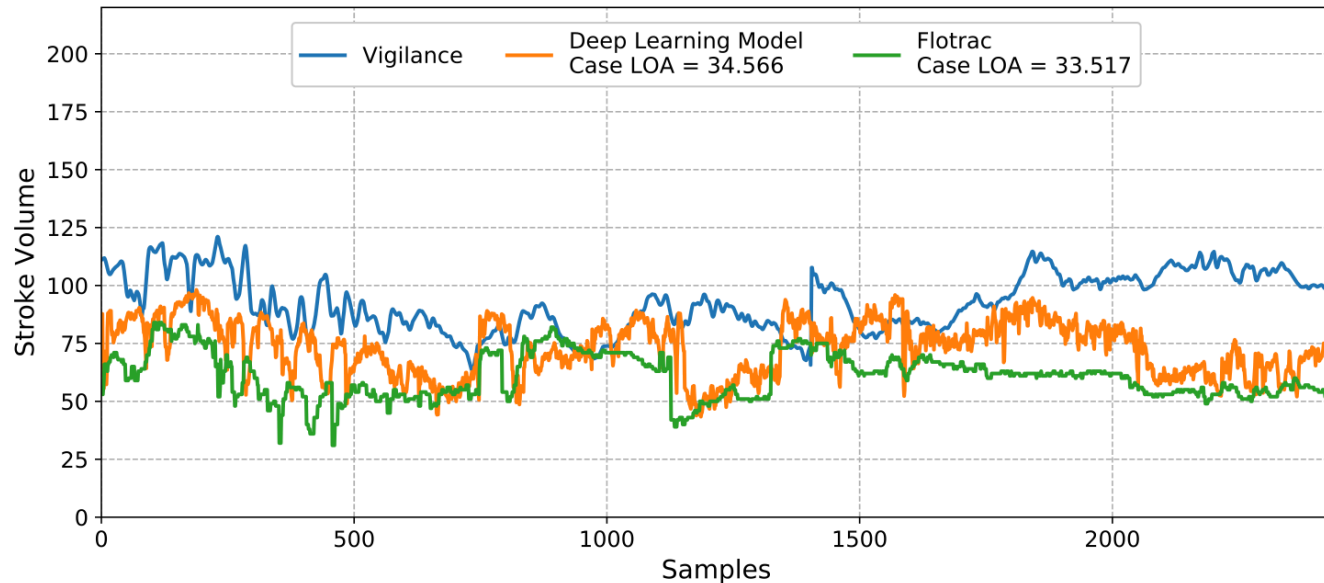

CaseID : Patient81 (anonymized)

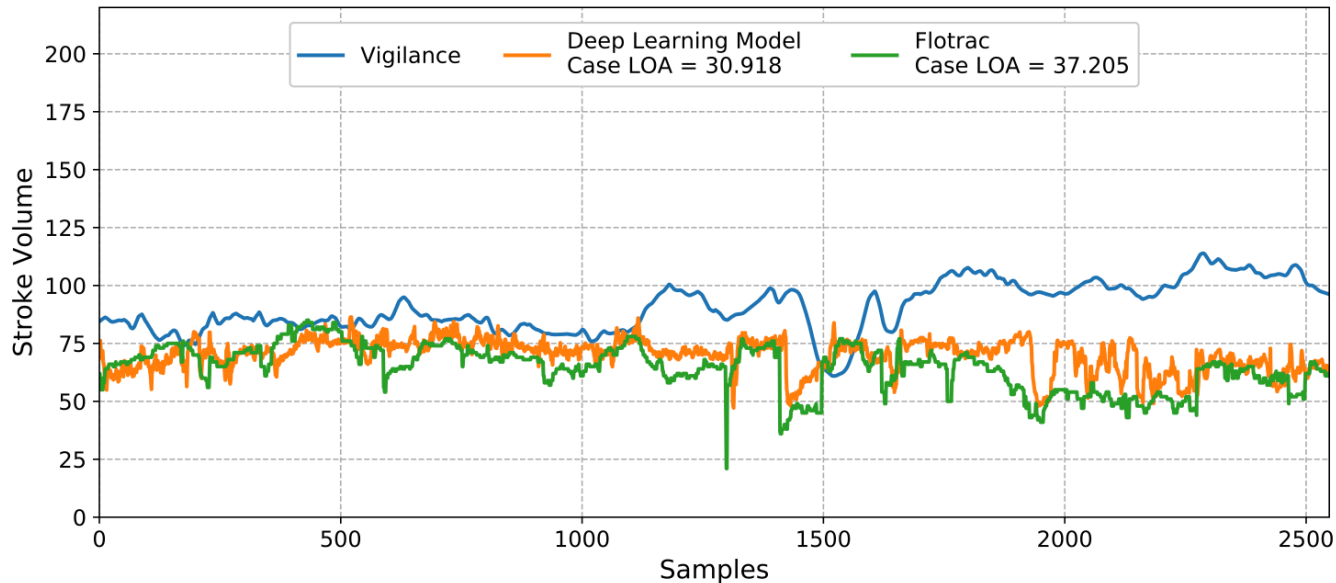

CaseID : Patient82 (anonymized)

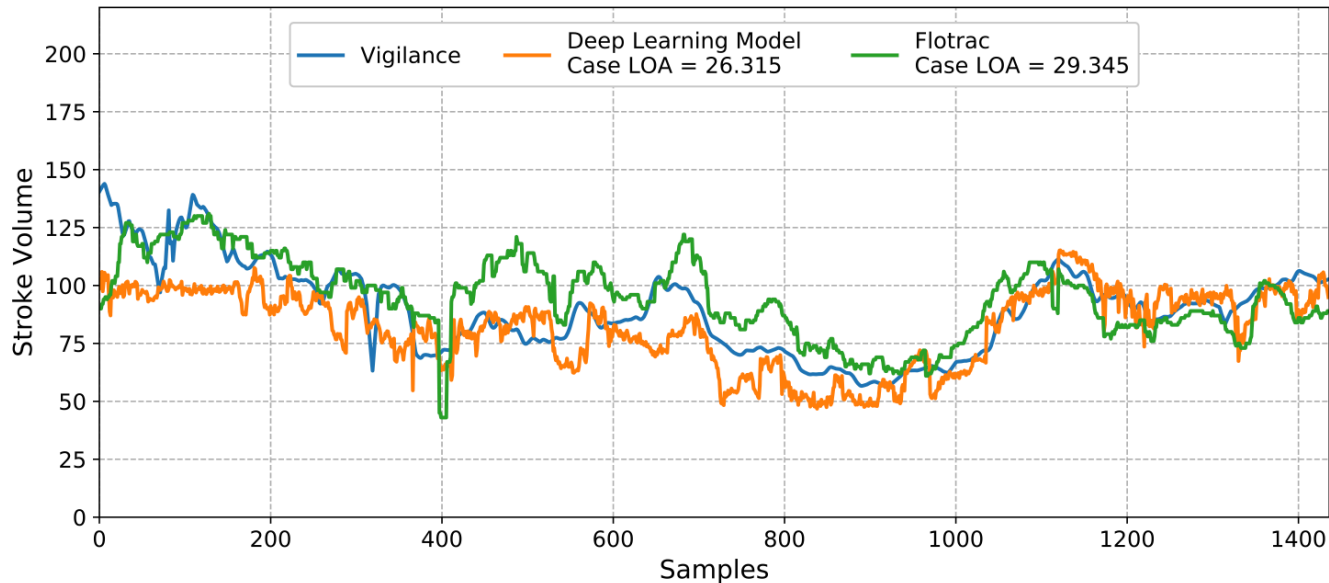

CaseID : Patient83 (anonymized)

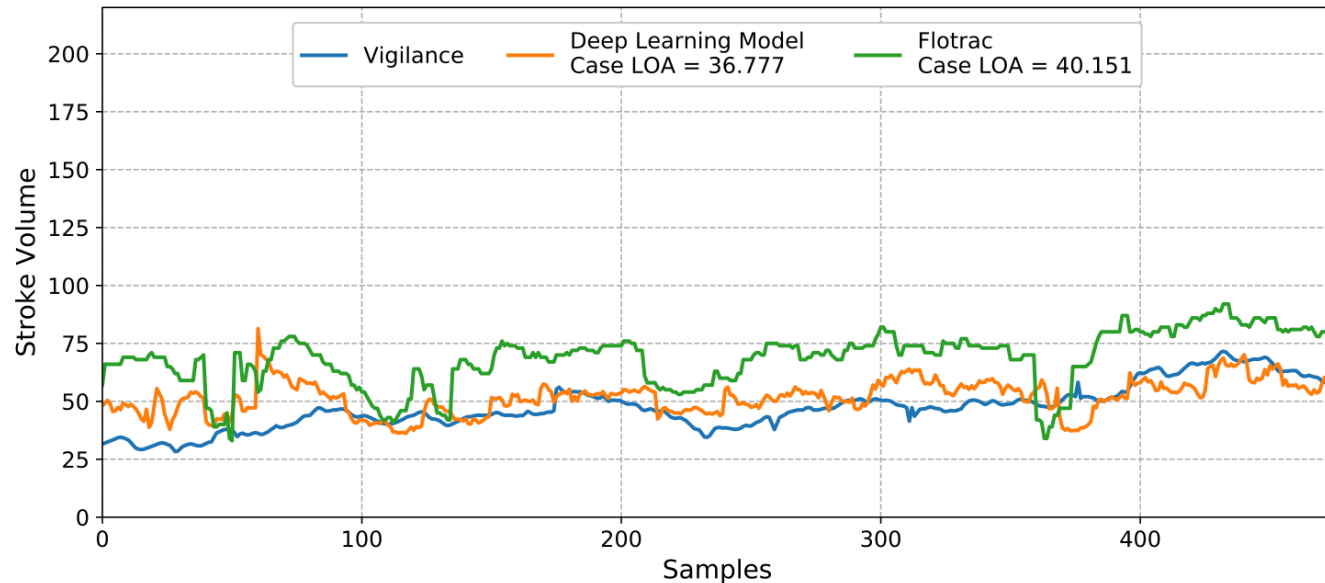



CaseID : Patient84 (anonymized)

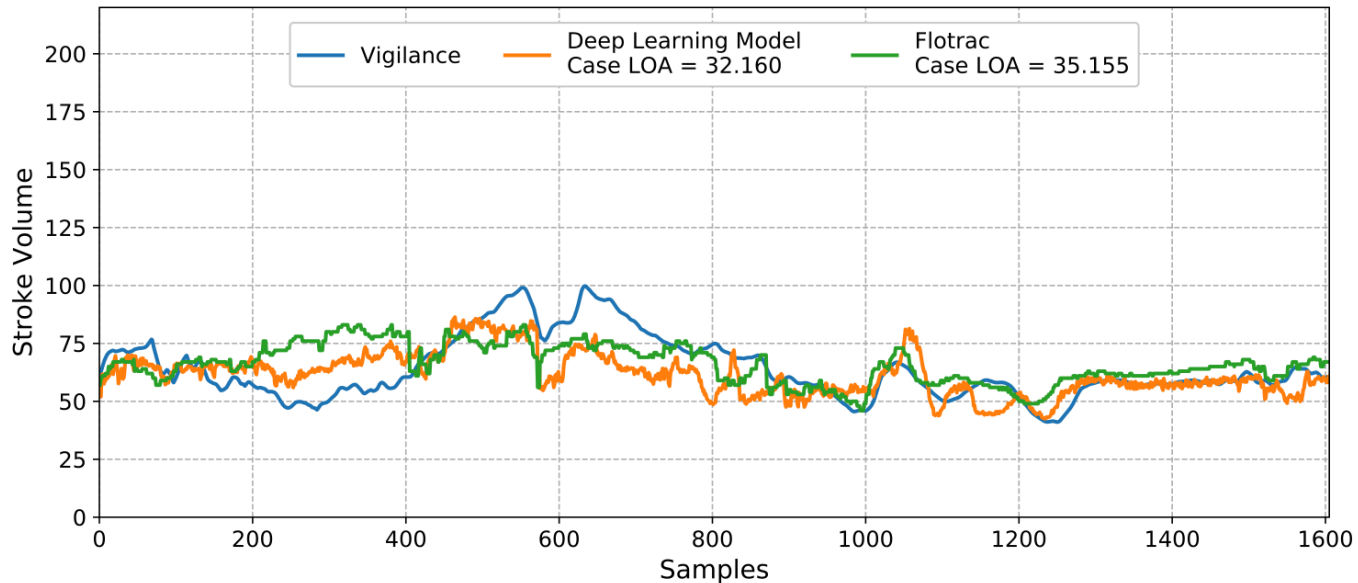

CaseID : Patient85 (anonymized)

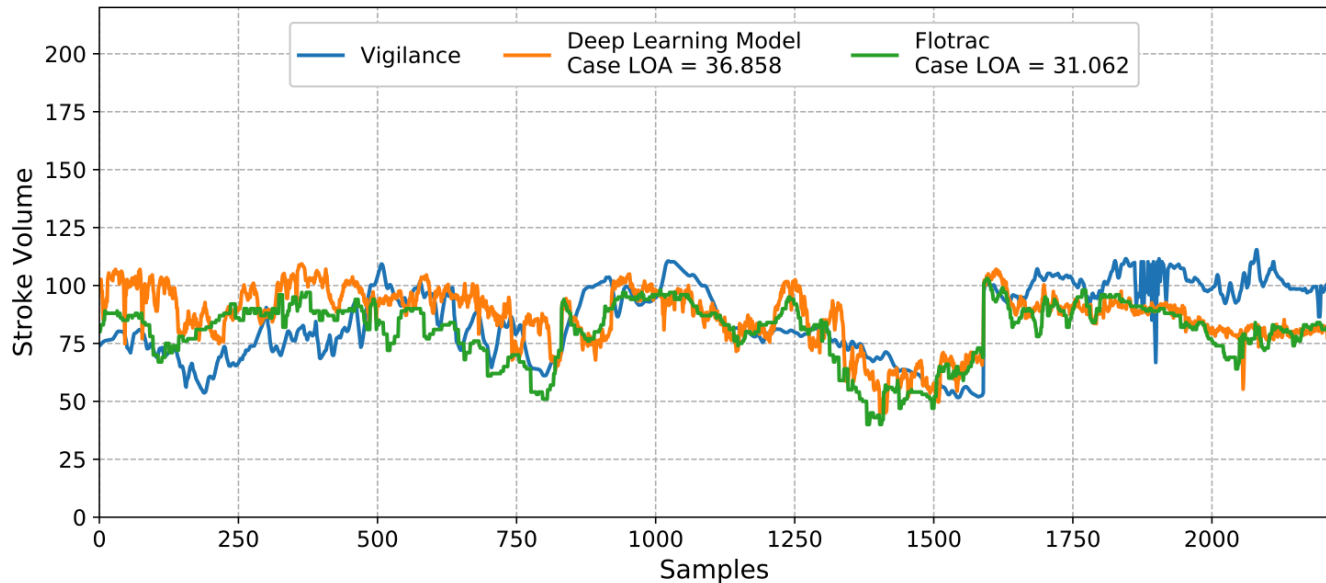

CaseID : Patient86 (anonymized)

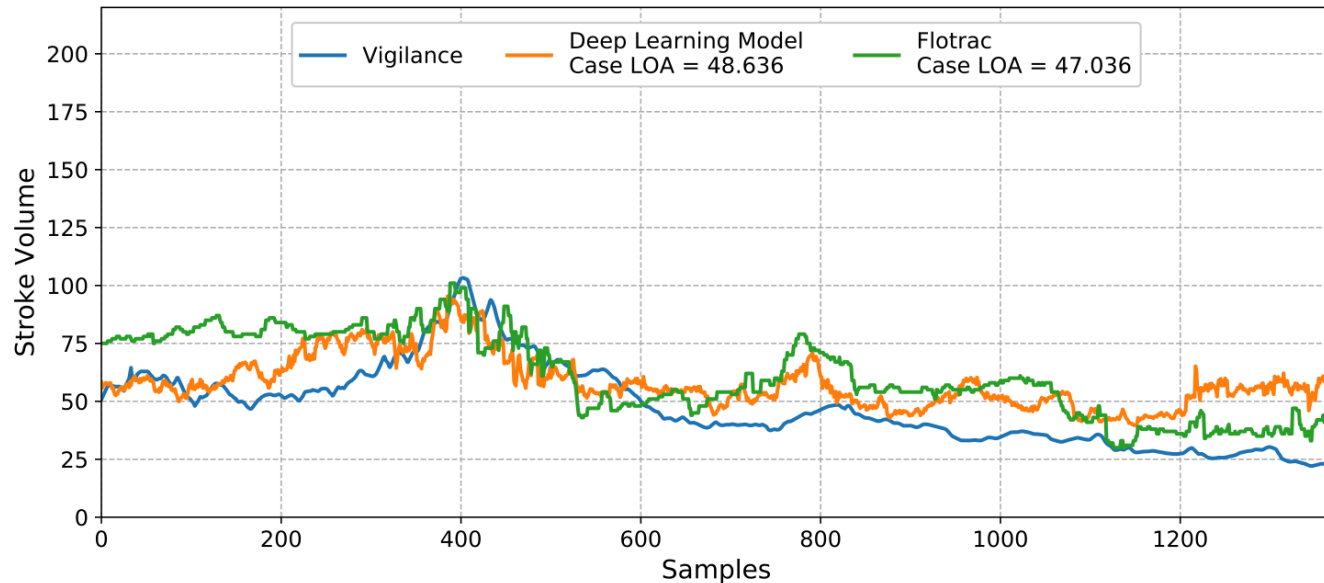

CaseID : Patient87 (anonymized)

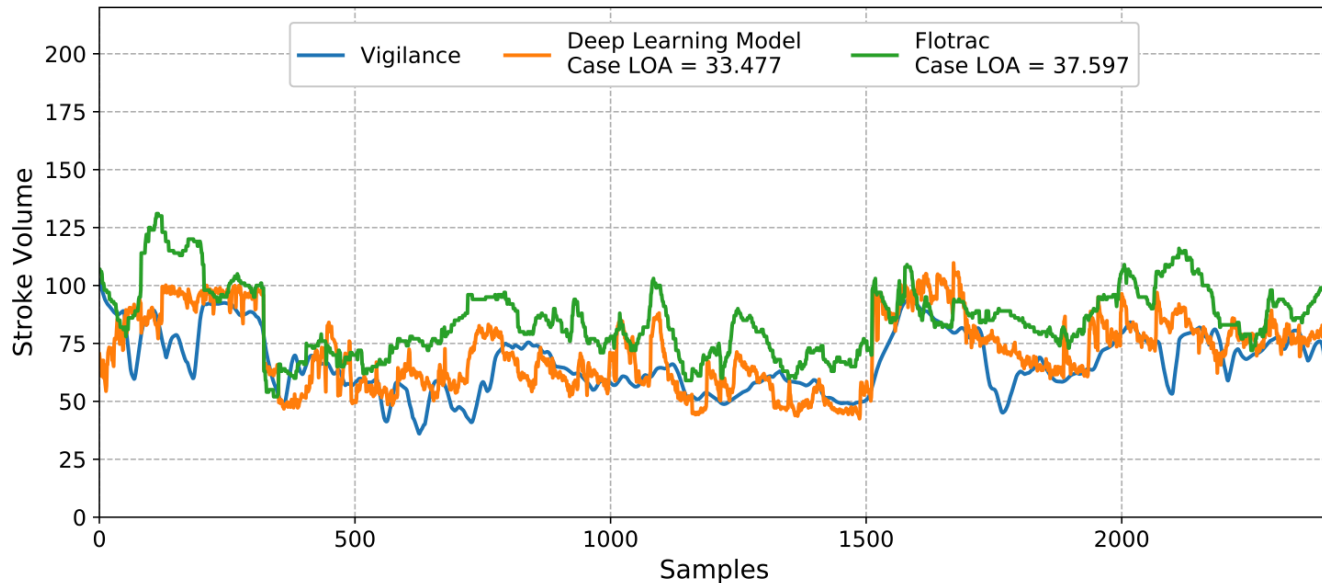

CaseID : Patient88 (anonymized)

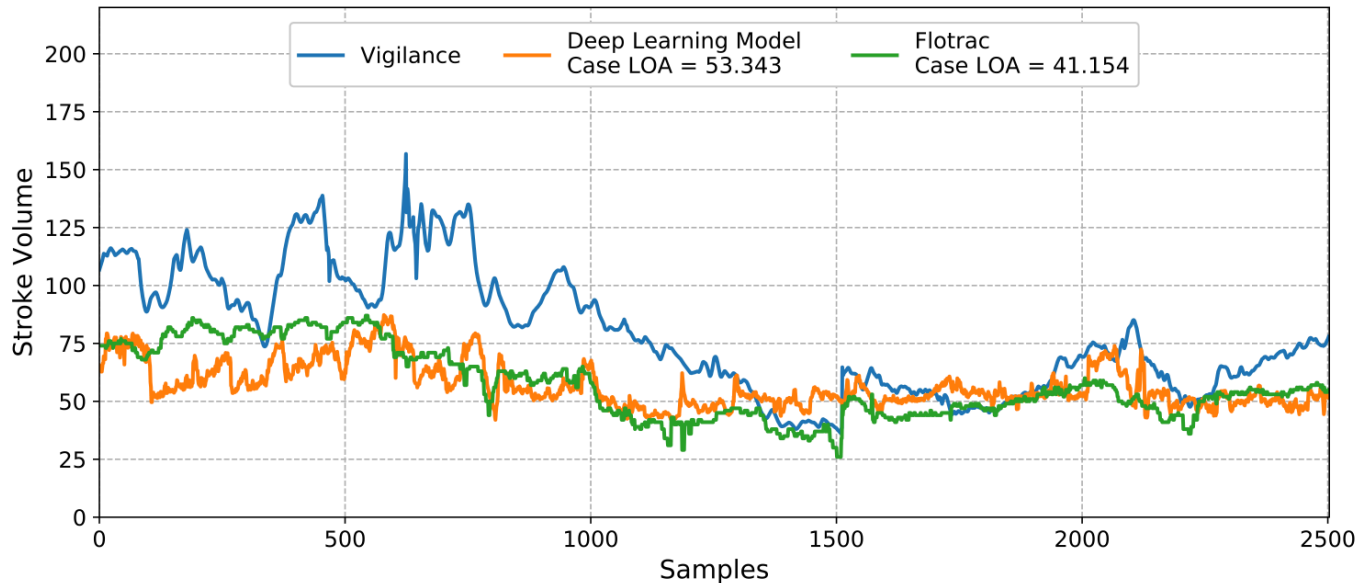

CaseID : Patient89 (anonymized)

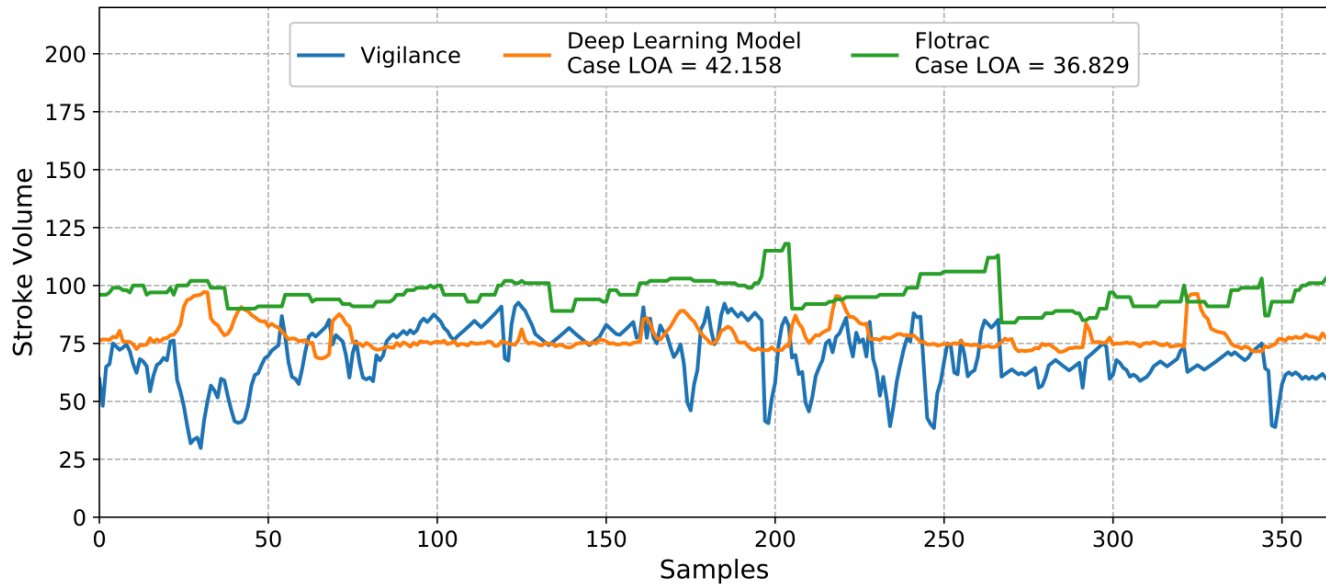

CaseID : Patient90 (anonymized)

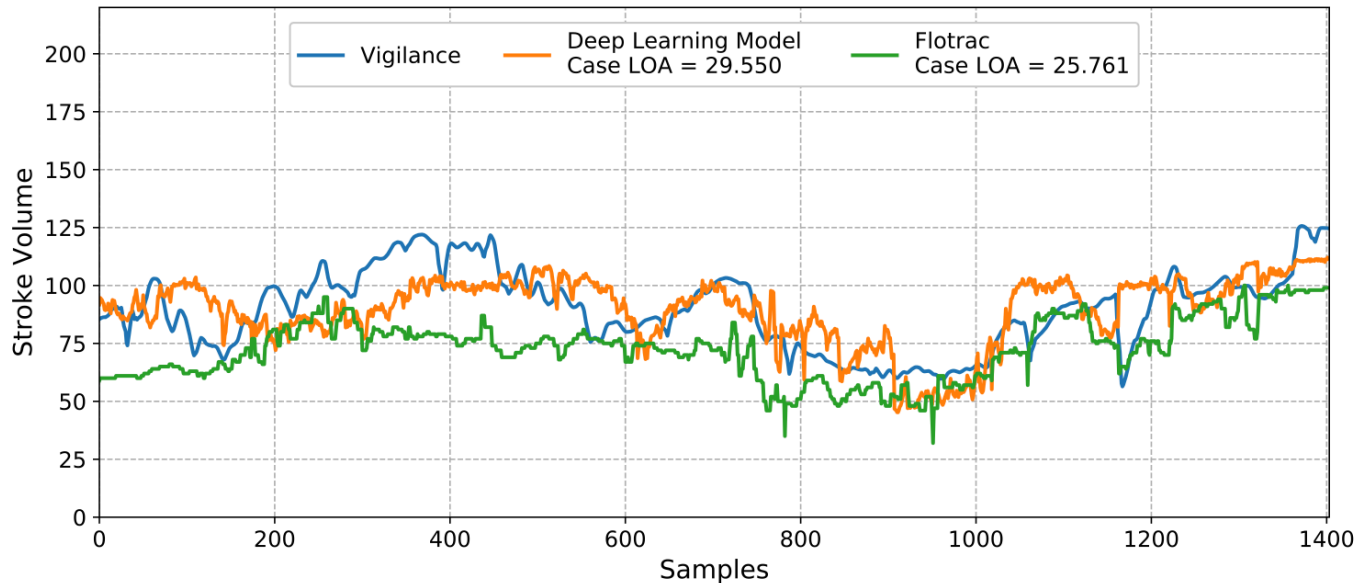

CaseID : Patient91 (anonymized)

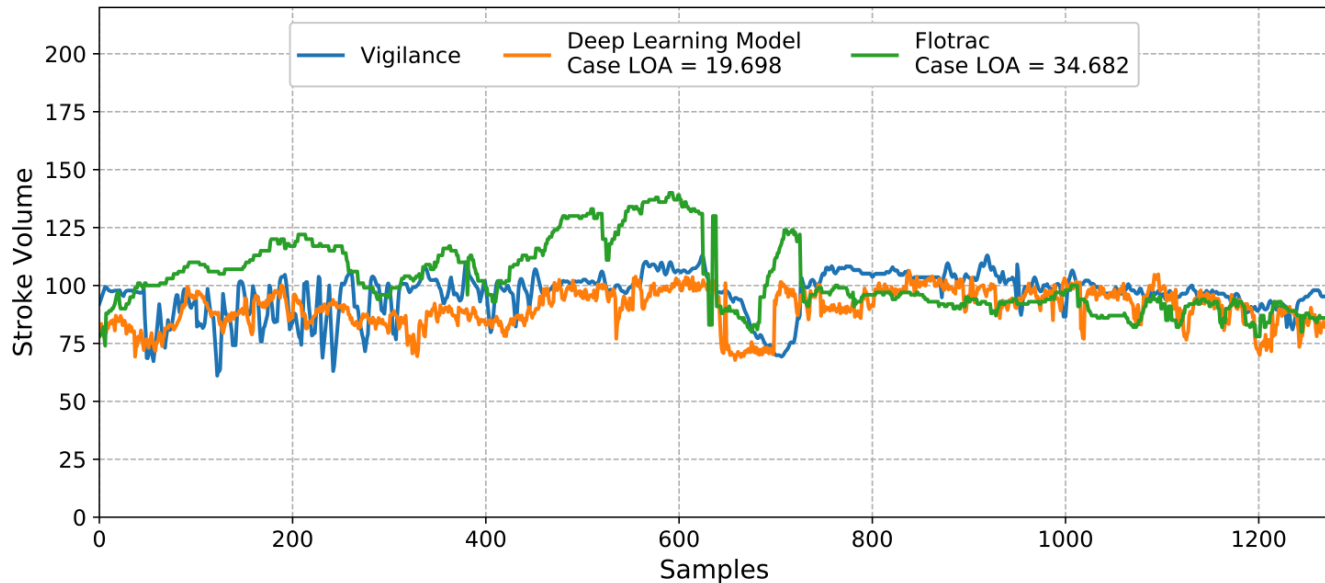



CaseID : Patient92 (anonymized)

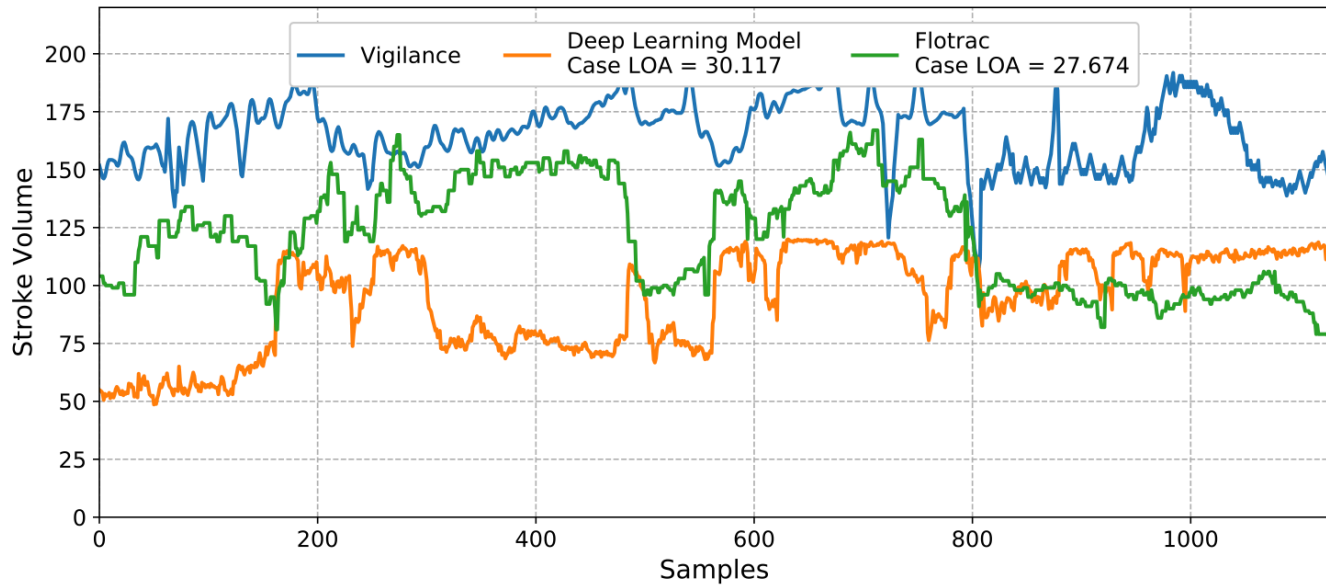

CaseID : Patient93 (anonymized)

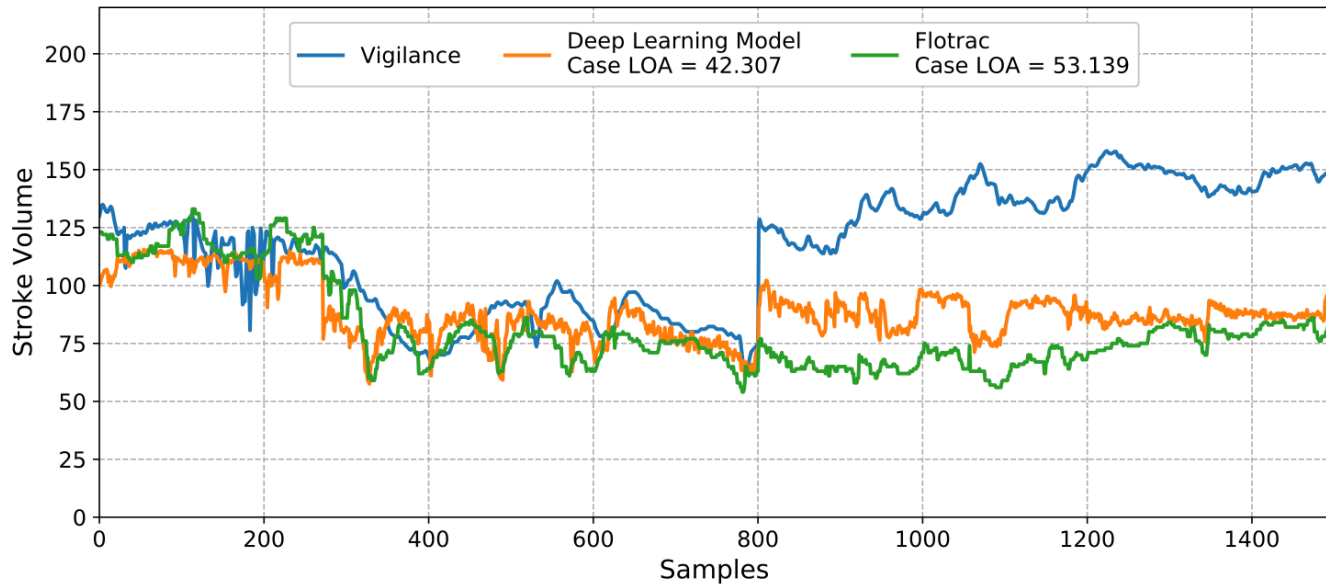

CaseID : Patient94 (anonymized)

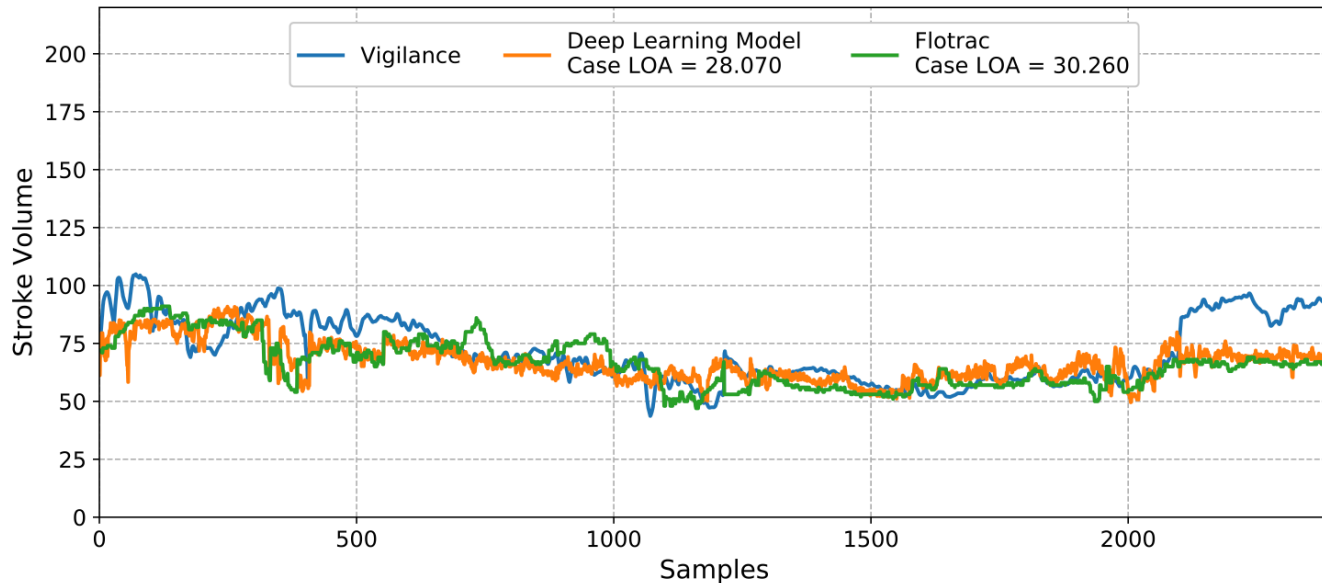

CaseID : Patient95 (anonymized)

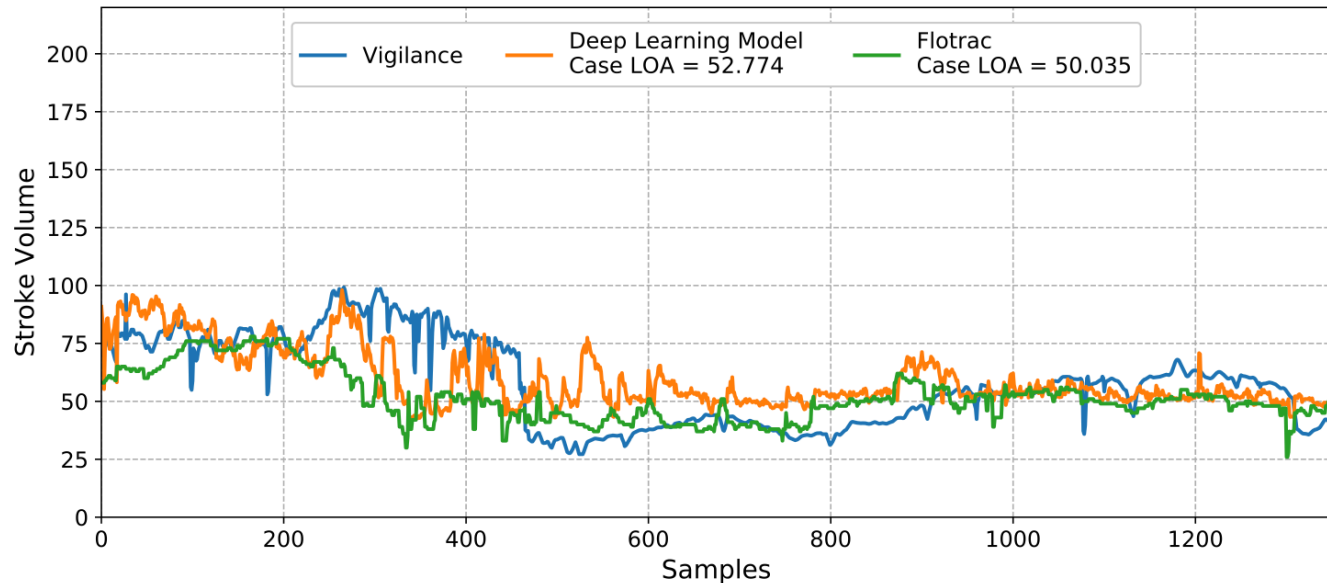

CaseID : Patient96 (anonymized)

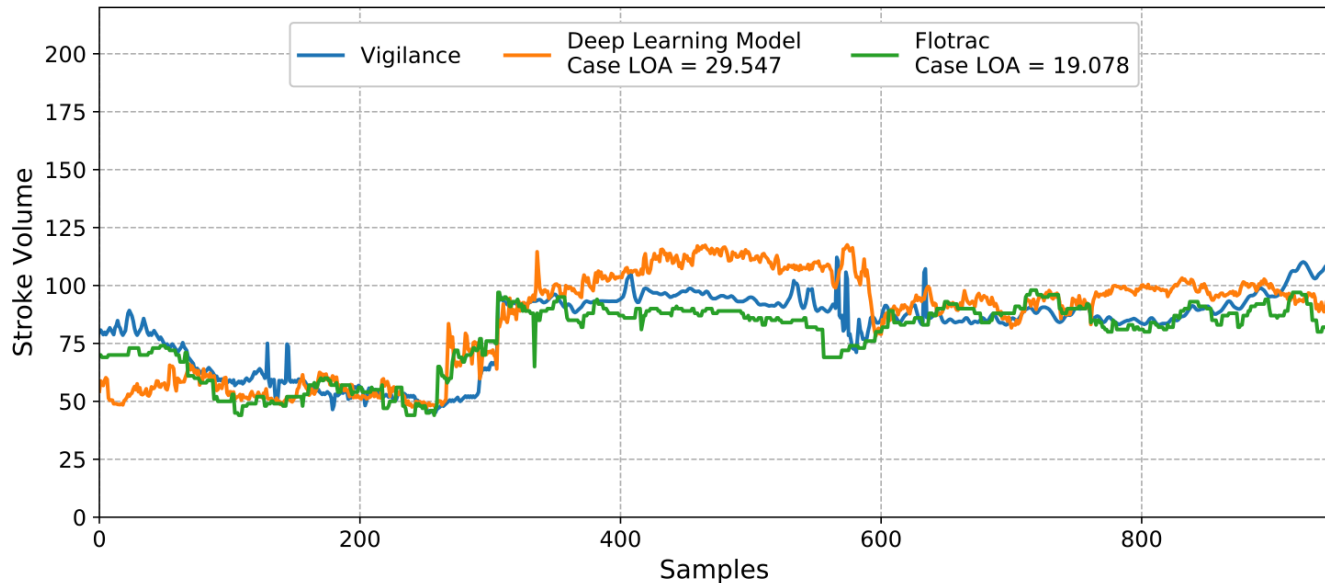

CaseID : Patient97 (anonymized)

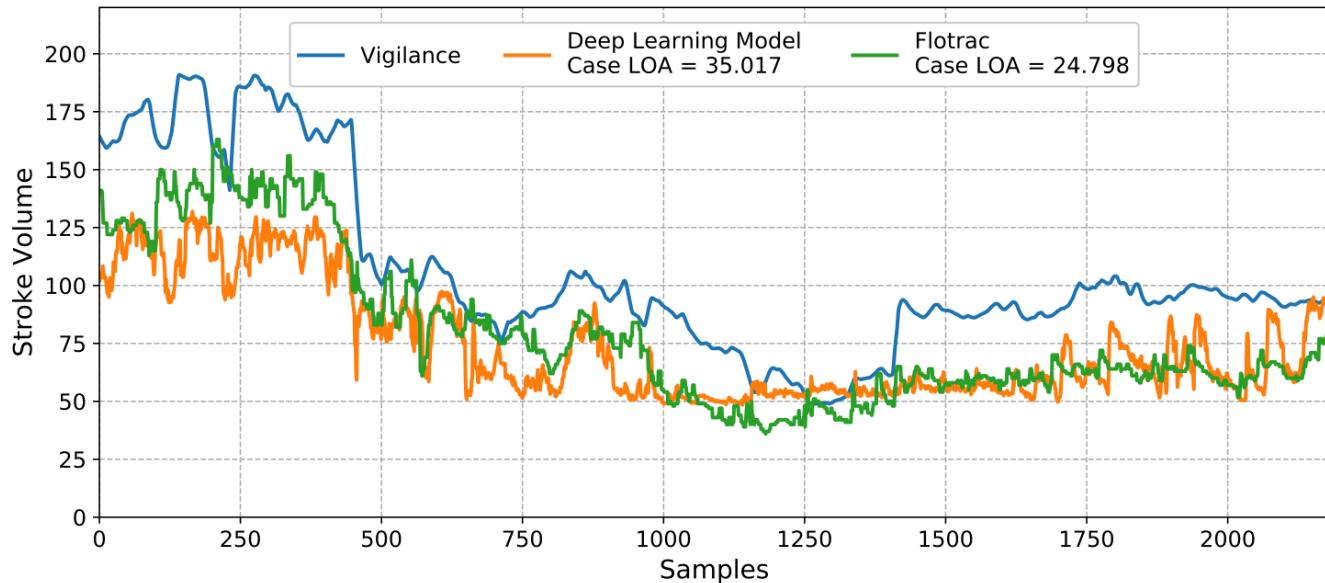

CaseID : Patient98 (anonymized)

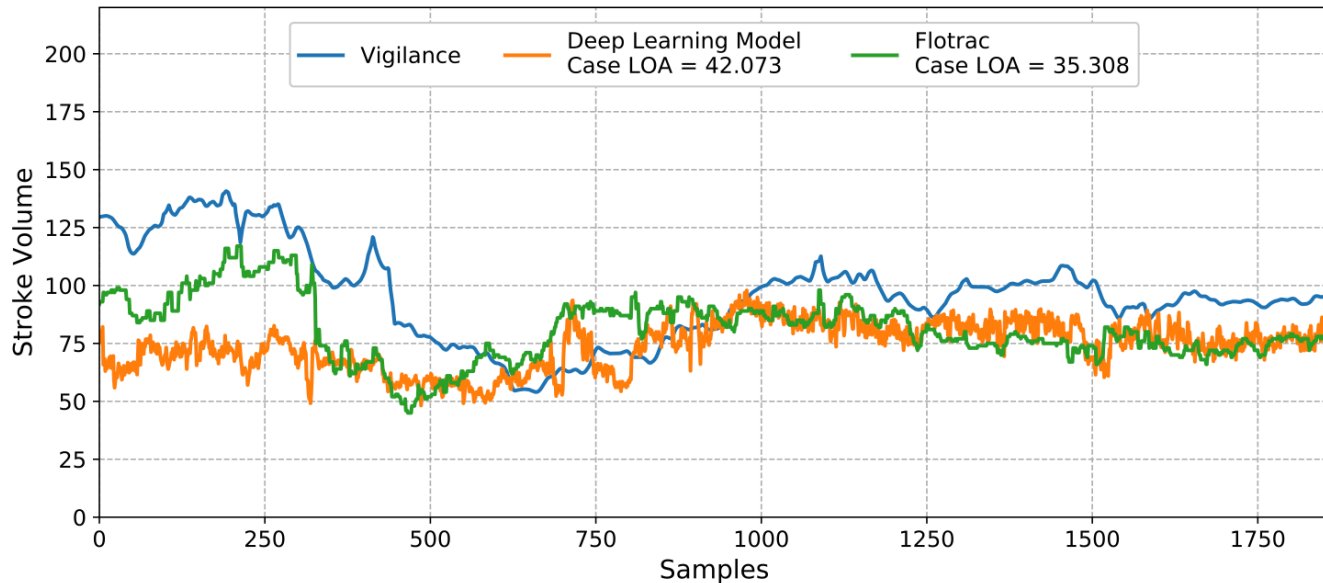

Supplement: medinform_v9i8e24762_app2.pdf [file medinform_v9i8e24762_app2.pdf]
